# Supplementary material
Source: publisher figshare collection journal article supplement (https://gsapubs.figshare.com/ndownloader/files/23306348)
Supplement: Supplementary file 1 [file 23306348]

**Slagstad, T., and Kirkland, C.L., 2017, The use of detrital zircon data in terrane analysis: A nonunique answer to provenance and tectonostratigraphic position in the Scandinavian Caledonides: Lithosphere, <https://doi.org/10.1130/L663.1>.**

**GSA Data Repository Item 2017392**

## **Data Repository Supplement DR1 – Methods**

### **Laser ablation inductively coupled mass spectrometry (LA-ICP-MS) zircon U-Pb geochronology at NGU (sample M0082)**

The instrumentation used at NGU consists of a Finnigan MAT Element 1 single-collector high-resolution sector ICP-MS, coupled to a UP193–FX 193 nm short-pulse excimer laser ablation system from New Wave Research. The laser was set to ablate 35  $\mu\text{m}$  spots with a repetition rate of 12 Hz and an energy corresponding to a fluence of 3 J/cm<sup>2</sup>. The sample aerosol was transported from the sample chamber in a He gas, and introduced in the ICP-MS instrument as a mixture of He and Ar gas. The data were acquired in a time-resolved counting scanning mode for 60 s. Masses <sup>202</sup>Hg, <sup>204</sup>(Hg+Pb), <sup>206</sup>Pb, <sup>207</sup>Pb, <sup>208</sup>Pb, <sup>232</sup>Th and <sup>238</sup>U were measured. Monitoring <sup>202</sup>Hg and assuming a <sup>202</sup>Hg/<sup>204</sup>Hg ratio of 4.36 (natural abundance) corrects the interference of <sup>204</sup>Hg on <sup>204</sup>Pb. A 60 second delay was performed after each zircon analysis, and a 60 second gas blank was acquired at regular intervals. The measured isotope ratios were corrected for element- and mass-bias effects using the Geostandard 91500 reference zircon (1062.4  $\pm$  0.4 Ma; Wiedenbeck et al., 1995), normally based on 15 to 30 analyses during one analytical session. The data reduction was performed using MS Excel spreadsheets with Visual Basic macros developed in-house.

## Laser ablation split-stream inductively coupled mass spectrometry (LA-SS-ICP-MS)

The majority of the samples (85XXX) were analysed using a split stream laser ablation system where a portion of the ablated material was split between a quadrupole ICPMS for U–Pb analysis and a multicollector ICPMS for Lu–Hf analysis, meaning that age and compositional information was obtained from the same analytical volume. Zircon was ablated using a Resonetics RESolution M–50A–LR system, incorporating a COMpex 102 193 nm excimer UV laser. Following two cleaning pulses and a 40 s period of background analysis, samples were spot ablated for 35 s at a 10 Hz repetition rate using a 33  $\mu\text{m}$  beam and laser energy at the sample surface of  $2.3 \text{ J/cm}^2$ . An additional 40 s of baseline was collected after ablation. The sample cell was flushed with ultrahigh purity He (300 mL/min) and N<sub>2</sub> (1.0 mL/min) and high purity Ar was employed as the plasma carrier gas.

For U–Pb analysis isotopic intensities were measured using an Agilent 7700s quadrupole ICP–MS with the following elements monitored for 0.03 seconds each:  $^{28}\text{Si}$ ,  $^{29}\text{Si}$ ,  $^{204}\text{Pb}$ ,  $^{206}\text{Pb}$ ,  $^{207}\text{Pb}$ ,  $^{208}\text{Pb}$ ,  $^{232}\text{Th}$ , and  $^{238}\text{U}$ . Common lead concentration was monitored throughout the analysis, however, no significant  $^{204}\text{Pb}$  was detected and thus no common lead correction has been applied. The primary age standard used in this study was 91500 ( $1062.4 \pm 0.4 \text{ Ma}$ ; Wiedenbeck et al., 1995) with GJ–1 ( $608.5 \pm 1.5 \text{ Ma}$ ; Jackson et al., 2004) and R33 ( $419 \pm 0.4 \text{ Ma}$ ; Black et al., 2004) used as secondary age standards.  $^{206}\text{Pb}/^{238}\text{U}$  ages calculated for all secondary zircon standards were treated as unknowns and found to be within 3% of the accepted value.

For Lu–Hf analysis on a Nu Plasma II multi-collector inductively coupled plasma mass spectrometer all isotopes ( $^{180}\text{Hf}$ ,  $^{179}\text{Hf}$ ,  $^{178}\text{Hf}$ ,  $^{177}\text{Hf}$ ,  $^{176}\text{Hf}$ ,  $^{175}\text{Lu}$ ,  $^{174}\text{Hf}$ ,  $^{173}\text{Yb}$ ,  $^{172}\text{Yb}$  and  $^{171}\text{Yb}$ ) were counted on the Faraday collector array. Time resolved data was baseline

subtracted and reduced using Iolite (DRS after Woodhead et al., 2004), where  $^{176}\text{Yb}$  and  $^{176}\text{Lu}$  were removed from the 176 mass signal using  $^{176}\text{Yb}/^{173}\text{Yb} = 0.7962$  and  $^{176}\text{Lu}/^{175}\text{Lu} = 0.02655$  with an exponential law mass bias correction assuming  $^{172}\text{Yb}/^{173}\text{Yb} = 1.35274$  (Chu et al., 2002). The interference corrected  $^{176}\text{Hf}/^{177}\text{Hf}$  was normalized to  $^{179}\text{Hf}/^{177}\text{Hf} = 0.7325$  (Patchett and Tatsumoto, 1980) for mass bias correction. Zircons from the Mud Tank carbonatite locality were analysed together with the samples in each session to monitor the accuracy of the results. Nineteen analyses of Mud Tank yielded a  $^{176}\text{Hf}/^{177}\text{Hf}$  value of  $0.282507 \pm 23$  (MSWD = 0.2) identical within uncertainty to the recommended value ( $0.282522 \pm 42$ ; Griffin et al., 2006, 2007). GJ-1 and R33 zircons were also run to verify the method and yielded weighted average  $^{176}\text{Hf}/^{177}\text{Hf}$  values (GJ-1 =  $0.282073 \pm 0.000051$ , MSWD = 1.8, n = 18; R33  $0.282788 \pm 0.000027$ , MSWD = 1.1, n = 17) within uncertainty of their accepted values (R33 =  $0.282764 \pm 0.000014$ , Fisher et al., 2014; GJ-1 =  $0.282022 \pm 11$ , Matteini et al., 2010). In addition, the corrected  $^{180}\text{Hf}/^{177}\text{Hf}$  ratio was calculated to monitor the accuracy of the mass bias correction and yielded an average value of 1.886835, which is within the range of values reported by Thirlwall and Anczkiewicz (2004). Calculation of  $\epsilon\text{Hf}$  values employed the decay constant of Scherer et al. (2001) and the Chondritic Uniform Reservoir (CHUR) values of Blichert-Toft and Albarède (1997).

## References

- Black, L. P., Kamo, S. L., Allen, C. M., Davis, D. W., Aleinikoff, J. N., Valley, J. W., Mundil, R., Campbell, I. H., Korsch, R. J., Williams, I. S., and Foudoulis, C., 2004, Improved  $^{206}\text{Pb}/^{238}\text{U}$  microprobe geochronology by the monitoring of a trace-element-related matrix effect; SHRIMP, ID-TIMS, ELA-ICP-MS and oxygen isotope documentation for a series of zircon standards: *Chemical Geology*, v. 205, p. 115-140.
- Blichert-Toft, J., and Albarède, F., 1997, The Lu-Hf isotope geochemistry of chondrites and the evolution of the mantle-crust system: *Earth and Planetary Science Letters*, v. 148, p. 243-258.
- Chu, N.-C., Taylor, R. N., Chavagnac, V., Nesbitt, R. W., Boella, R. M., Milton, J. A., German, C. R., Bayon, G., and Burton, K., 2002, Hf isotope ratio analysis using multi-collector inductively coupled plasma mass spectrometry: an evaluation of

isobaric interference corrections: *Journal of Analytical Atomic Spectrometry*, v. 17, p. 1567-1574.

- Fisher, C. M., Vervoort, J. D., and DuFrane, S. A., 2014, Accurate Hf isotope determinations of complex zircons using the “laser ablation split stream” method: *Geochemistry, Geophysics, Geosystems*, v. 15, p. 121-139.
- Griffin, W. L., Pearson, N. J., Belousova, E. A., and Saeed, A., 2006, Comment: Hf-isotope heterogeneity in zircon 91500: *Chemical Geology*, v. 233, p. 358-363.
- , 2007, Reply to “Comment to short-communication ‘Comment: Hf-isotope heterogeneity in zircon 91500’ by W.L. Griffin, N.J. Pearson, E.A. Belousova and A. Saeed (*Chemical Geology* 233 (2006) 358–363)” by F. Corfu: *Chemical Geology*, v. 244, p. 354-356.
- Jackson, S. E., Pearson, N. J., Griffin, W. L., and Belousova, E. A., 2004, The application of laser ablation-inductively coupled plasma-mass spectrometry to in situ U-Pb zircon geochronology: *Chemical Geology*, v. 211, p. 47-69.
- Matteini, M., Dantas, E. L., Pimentel, M. M., and Bühn, B., 2010, Combined U-Pb and Lu-Hf isotope analyses by laser ablation MC-ICP-MS: methodology and applications: *Anais da Academia Brasileira de Ciências*, v. 82, p. 479-491.
- Patchett, P. J., and Tatsumoto, M., 1980, Hafnium isotope variations in oceanic basalts: *Geophysical Research Letters*, v. 7, p. 1077-1080.
- Scherer, E., Münker, C., and Mezger, K., 2001, Calibration of the Lutetium-Hafnium Clock: *Science*, v. 293, p. 683.
- Thirlwall, M. F., and Anczkiewicz, R., 2004, Multidynamic isotope ratio analysis using MC-ICP-MS and the causes of secular drift in Hf, Nd and Pb isotope ratios: *International Journal of Mass Spectrometry*, v. 235, p. 59-81.
- Wiedenbeck, M., Allé, P., Corfu, F., Griffin, W. L., Meier, M., Oberli, F., Von Quadt, A., Roddick, J. C., and Spiegel, W., 1995, Three natural zircon standards for U-Th-Pb-Lu-Hf, trace element and REE analyses: *Geostandards Newsletter*, v. 19, p. 1-23.
- Woodhead, J., Hergt, J., Shelley, M., Eggins, S., and Kemp, R., 2004, Zircon Hf-isotope analysis with an excimer laser, depth profiling, ablation of complex geometries, and concomitant age estimation: *Chemical Geology*, v. 209, p. 121-135.
