# Supplementary material
Source: publisher figshare collection journal article supplement (https://gsapubs.figshare.com/ndownloader/files/23306348)
Supplement: Supplementary file 2 [file 23306348]

Archive with 3 entries (3 files):
- 2017392_DR1.pdf
- 2017392_DR2.xls
- 2017392_DR3.xls
