# Supplementary material
Source: publisher figshare collection journal article supplement (https://gsapubs.figshare.com/ndownloader/files/23306348)
Supplement: Supplementary file 2 [file 23306348 › 2017392_DR2.xls]

## Sheet: PlotDat2
Source sheet	All U-Pb data	3.21543	0.1966	1.6071	0.24	31.7347	0.0501079	3.44459	0.1966	9.85279	0.0769	9.4104	0.0783	8.65893	0.0726	7.66896	0.0735	7.61762	0.071	7.16723	0.088	7.5265	0.0735	7.80505	0.0759	6.80895	0.07186	6.85208	0.0778	6.85702	0.0784	6.9007	0.0841	7.04117	0.0743	6.10762	0.074	6.77789	0.0786	5.5207	0.07298	5.95092	0.0735	6.24286	0.0778	5.95701	0.0765	5.91265	0.0764
Plot name	Concordia2	9.51475	0.0769	1.62168	0.236498	15.6212	0.0547005	3.44019	0.19777	9.8463	0.0773537	9.40474	0.0787059	8.64701	0.0733163	7.66436	0.0742879	7.6114	0.0714537	7.16203	0.0885969	7.51767	0.0739537	7.79411	0.076473	6.80613	0.0720677	6.84725	0.0785163	6.85077	0.0789253	6.89485	0.0846253	7.02449	0.076616	6.10464	0.0742865	6.77195	0.078982	5.51022	0.0731256	5.9479	0.0738104	6.23831	0.0782537	5.95453	0.0767626	5.90877	0.0771402
Plot Type	1	9.11577	0.0783	1.68745	0.222656	10.2518	0.059901	3.42715	0.198895	9.82706	0.0777899	9.38797	0.0790962	8.61171	0.0740051	7.65073	0.0750456	7.59298	0.0718899	7.14663	0.0891709	7.49153	0.0743899	7.76172	0.0770241	6.79778	0.0722675	6.83294	0.0792051	6.83226	0.0794304	6.87753	0.0851304	6.97507	0.0788431	6.0958	0.074562	6.75433	0.0793494	5.47917	0.0732657	5.93896	0.0741089	6.22483	0.0786899	5.94716	0.0770152	5.8973	0.0778519
1st free col	123	8.03858	0.0726	1.75767	0.209729	7.56836	0.0657994	3.40597	0.199932	9.79582	0.0781919	9.36074	0.0794559	8.55438	0.0746398	7.62859	0.0757438	7.56307	0.0722919	7.12161	0.0896999	7.44908	0.0747919	7.70913	0.0775319	6.78422	0.0724516	6.8097	0.0798398	6.80219	0.0798959	6.8494	0.0855959	6.89483	0.0808955	6.08146	0.0748159	6.72572	0.0796879	5.42876	0.0733948	5.92443	0.0743839	6.20294	0.0790919	5.93519	0.0772479	5.87867	0.0785078
Sigma Level	2	7.42942	0.0735	1.8328	0.197651	5.95934	0.0724996	3.37747	0.200841	9.75378	0.0785443	9.3241	0.0797712	8.47724	0.0751962	7.5988	0.0763559	7.52282	0.0726443	7.08795	0.0901635	7.39195	0.0751443	7.63834	0.077977	6.76597	0.0726129	6.77844	0.0803962	6.76173	0.0803039	6.81154	0.0860039	6.78684	0.0826945	6.06215	0.0750385	6.68722	0.0799847	5.36091	0.0735079	5.90489	0.074625	6.17349	0.0794443	5.91908	0.077452	5.85359	0.0790828
Absolute Errs	TRUE	7.29395	0.071	1.91338	0.186365	4.88752	0.0801223	3.34275	0.201586	9.70256	0.0788335	9.27946	0.0800299	8.38323	0.0756528	7.5625	0.0768581	7.47377	0.0729335	7.04693	0.090544	7.32234	0.0754335	7.5521	0.0783423	6.74374	0.0727453	6.74034	0.0808528	6.71243	0.0806387	6.76542	0.0863387	6.65526	0.0841709	6.03863	0.0752211	6.6403	0.0802282	5.27823	0.0736007	5.88107	0.0748229	6.13759	0.0797335	5.89946	0.0776194	5.82304	0.0795546
Symbol Type	1	6.89655	0.088	2	0.175816	4.12267	0.088807	3.30313	0.20214	9.64411	0.0790484	9.22852	0.0802222	8.27598	0.0759921	7.52109	0.0772313	7.41781	0.0731484	7.00014	0.0908268	7.24293	0.0756484	7.4537	0.0786137	6.71837	0.0728437	6.69687	0.0811921	6.65618	0.0808876	6.71279	0.0865876	6.50514	0.0852679	6.01179	0.0753569	6.58678	0.0804091	5.18391	0.0736697	5.85389	0.0749699	6.09665	0.0799484	5.87707	0.0777438	5.78818	0.0799052
Inverse Plot	TRUE	7.06714	0.0735	2.09336	0.165954	3.54967	0.0987156	3.26014	0.202482	9.5807	0.0791807	9.17325	0.0803406	8.15961	0.0762011	7.47615	0.0774612	7.35709	0.0732807	6.94936	0.0910009	7.15675	0.0757807	7.34693	0.0787809	6.69085	0.0729043	6.64971	0.0814011	6.59515	0.0810408	6.65569	0.0867408	6.34224	0.0859435	5.98267	0.0754404	6.5287	0.0805206	5.08156	0.0737122	5.82441	0.0750605	6.05221	0.0800807	5.85277	0.0778204	5.75036	0.0801211
Color Plot	TRUE	7.23589	0.0759	2.19427	0.15673	3.10458	0.110036	3.21543	0.202597	9.51475	0.0792254	9.11577	0.0803806	8.03858	0.0762716	7.42942	0.0775388	7.29395	0.0733254	6.89655	0.0910597	7.06714	0.0758254	7.23589	0.0788373	6.66223	0.0729248	6.60066	0.0814716	6.53168	0.0810925	6.59631	0.0867925	6.17284	0.0861716	5.95238	0.0754686	6.4683	0.0805582	4.97512	0.0737266	5.79374	0.075091	6.00601	0.0801254	5.82751	0.0778463	5.71102	0.080194
3D plot	FALSE	6.66223	0.07186	2.30366	0.148103	2.74902	0.122987	3.17073	0.202482	9.4488	0.0791807	9.05829	0.0803406	7.91756	0.0762011	7.38269	0.0774612	7.2308	0.0732807	6.84375	0.0910009	6.97752	0.0757807	7.12485	0.0787809	6.6336	0.0729043	6.55161	0.0814011	6.46821	0.0810408	6.53692	0.0867408	6.00344	0.0859435	5.9221	0.0754404	6.40791	0.0805206	4.86869	0.0737122	5.76308	0.0750605	5.9598	0.0800807	5.80224	0.0778204	5.67169	0.0801211
Linear	FALSE	6.60066	0.0778	2.42264	0.140031	2.45857	0.137821	3.12774	0.20214	9.38538	0.0790484	9.00302	0.0802222	7.80119	0.0759921	7.33775	0.0772313	7.17008	0.0731484	6.79297	0.0908268	6.89135	0.0756484	7.01808	0.0786137	6.60608	0.0728437	6.50445	0.0811921	6.40717	0.0808876	6.47982	0.0865876	5.84054	0.0852679	5.89297	0.0753569	6.34983	0.0804091	4.76634	0.0736697	5.73359	0.0749699	5.91537	0.0799484	5.77795	0.0777438	5.63386	0.0799052
Data Range	C4:F60	6.53168	0.0784	2.55251	0.132475	2.21696	0.154833	3.08812	0.201586	9.32694	0.0788335	8.95208	0.0800299	7.69394	0.0756528	7.29634	0.0768581	7.11412	0.0729335	6.74617	0.090544	6.81193	0.0754335	6.91968	0.0783423	6.58071	0.0727453	6.46098	0.0808528	6.35093	0.0806387	6.4272	0.0863387	5.69042	0.0841709	5.86613	0.0752211	6.29631	0.0802282	4.67202	0.0736007	5.70642	0.0748229	5.87442	0.0797335	5.75555	0.0776194	5.59901	0.0795546
Filled Symbols	TRUE	6.59631	0.0841	2.69483	0.125402	2.01291	0.174366	3.0534	0.200841	9.27571	0.0785443	8.90744	0.0797712	7.59993	0.0751962	7.26004	0.0763559	7.06508	0.0726443	6.70515	0.0901635	6.74232	0.0751443	6.83344	0.077977	6.55848	0.0726129	6.42288	0.0803962	6.30163	0.0803039	6.38107	0.0860039	5.55884	0.0826945	5.84261	0.0750385	6.24939	0.0799847	4.58934	0.0735079	5.6826	0.074625	5.83853	0.0794443	5.73593	0.077452	5.56845	0.0790828
ConcAge	FALSE	6.17284	0.0743	2.85146	0.118779	1.83837	0.196819	3.0249	0.199932	9.23367	0.0781919	8.8708	0.0794559	7.52279	0.0746398	7.23025	0.0757438	7.02482	0.0722919	6.67149	0.0896999	6.68519	0.0747919	6.76265	0.0775319	6.54023	0.0724516	6.39162	0.0798398	6.26116	0.0798959	6.34321	0.0855959	5.45085	0.0808955	5.8233	0.0748159	6.21089	0.0796879	4.52149	0.0733948	5.66305	0.0743839	5.80907	0.0790919	5.71982	0.0772479	5.54338	0.0785078
ConcSwap	FALSE	5.95238	0.074	3.02463	0.112574	1.68745	0.222656	3.00372	0.198895	9.20244	0.0777899	8.84357	0.0790962	7.46546	0.0740051	7.20811	0.0750456	6.99491	0.0718899	6.64648	0.0891709	6.64275	0.0743899	6.71006	0.0770241	6.52667	0.0722675	6.36838	0.0792051	6.2311	0.0794304	6.31509	0.0851304	5.37061	0.0788431	5.80896	0.074562	6.18228	0.0793494	4.47107	0.0732657	5.64853	0.0741089	5.78718	0.0786899	5.70786	0.0770152	5.52475	0.0778519
1st Symbol-row	1	6.4683	0.0786	3.21711	0.10676	IsoLine	IsoLine	2.99068	0.19777	9.1832	0.0773537	8.8268	0.0787059	7.43016	0.0733163	7.19448	0.0742879	6.97649	0.0714537	6.63107	0.0885969	6.61661	0.0739537	6.67767	0.076473	6.51832	0.0720677	6.35407	0.0785163	6.21259	0.0789253	6.29776	0.0846253	5.32119	0.076616	5.80012	0.0742865	6.16466	0.078982	4.44003	0.0731256	5.63958	0.0738104	5.7737	0.0782537	5.70049	0.0767626	5.51327	0.0771402
		4.97512	0.07298	3.43229	0.101311			2.98628	0.1966	9.1767	0.0769	8.82114	0.0783	7.41824	0.0726	7.18988	0.0735	6.97027	0.071	6.62587	0.088	6.60778	0.0735	6.66673	0.0759	6.5155	0.07186	6.34924	0.0778	6.20633	0.0784	6.29192	0.0841	5.30451	0.0743	5.79714	0.074	6.15872	0.0786	4.42954	0.07298	5.63656	0.0735	5.76915	0.0778	5.698	0.0765	5.5094	0.0764
		5.79374	0.0735	3.6744	0.0962022			2.99068	0.19543	9.1832	0.0764463	8.8268	0.0778941	7.43016	0.0718837	7.19448	0.0727121	6.97649	0.0705463	6.63107	0.0874031	6.61661	0.0730463	6.67767	0.075327	6.51832	0.0716523	6.35407	0.0770837	6.21259	0.0778747	6.29776	0.0835747	5.32119	0.071984	5.80012	0.0737135	6.16466	0.078218	4.44003	0.0728344	5.63958	0.0731896	5.7737	0.0773463	5.70049	0.0762374	5.51327	0.0756598
		6.00601	0.0778	3.9488	0.0914107			3.00372	0.194305	9.20244	0.0760101	8.84357	0.0775038	7.46546	0.0711949	7.20811	0.0719544	6.99491	0.0701101	6.64648	0.0868291	6.64275	0.0726101	6.71006	0.0747759	6.52667	0.0714525	6.36838	0.0763949	6.2311	0.0773696	6.31509	0.0830696	5.37061	0.0697569	5.80896	0.073438	6.18228	0.0778506	4.47107	0.0726943	5.64853	0.0728911	5.78718	0.0769101	5.70786	0.0759848	5.52475	0.0749481
		5.82751	0.0765	4.26237	0.0869154			3.0249	0.193268	9.23367	0.0756081	8.8708	0.0771441	7.52279	0.0705602	7.23025	0.0712562	7.02482	0.0697081	6.67149	0.0863001	6.68519	0.0722081	6.76265	0.0742681	6.54023	0.0712684	6.39162	0.0757602	6.26116	0.0769041	6.34321	0.0826041	5.45085	0.0677045	5.8233	0.0731841	6.21089	0.0775121	4.52149	0.0725652	5.66305	0.0726161	5.80907	0.0765081	5.71982	0.0757521	5.54338	0.0742922
		5.71102	0.0764	4.62412	0.0826968			3.0534	0.192359	9.27571	0.0752557	8.90744	0.0768288	7.59993	0.0700038	7.26004	0.0706441	7.06508	0.0693557	6.70515	0.0858365	6.74232	0.0718557	6.83344	0.073823	6.55848	0.0711071	6.42288	0.0752038	6.30163	0.0764961	6.38107	0.0821961	5.55884	0.0659055	5.84261	0.0729615	6.24939	0.0772153	4.58934	0.0724521	5.6826	0.072375	5.83853	0.0761557	5.73593	0.075548	5.56845	0.0737172
		5.61482	0.0757	5.04601	0.0787364			3.08812	0.191614	9.32694	0.0749665	8.95208	0.0765701	7.69394	0.0695472	7.29634	0.0701419	7.11412	0.0690665	6.74617	0.085456	6.81193	0.0715665	6.91968	0.0734577	6.58071	0.0709747	6.46098	0.0747472	6.35093	0.0761613	6.4272	0.0818613	5.69042	0.0644291	5.86613	0.0727789	6.29631	0.0769718	4.67202	0.0723593	5.70642	0.0721771	5.87442	0.0758665	5.75555	0.0753806	5.59901	0.0732454
		5.68182	0.0784	5.54433	0.0750173			3.12774	0.19106	9.38538	0.0747516	9.00302	0.0763778	7.80119	0.0692079	7.33775	0.0697687	7.17008	0.0688516	6.79297	0.0851732	6.89135	0.0713516	7.01808	0.0731863	6.60608	0.0708763	6.50445	0.0744079	6.40717	0.0759124	6.47982	0.0816124	5.84054	0.0633321	5.89297	0.0726431	6.34983	0.0767909	4.76634	0.0722903	5.73359	0.0720301	5.91537	0.0756516	5.77795	0.0752562	5.63386	0.0728948
		5.60538	0.0804	6.14186	0.0715235			3.17073	0.190718	9.4488	0.0746193	9.05829	0.0762594	7.91756	0.0689989	7.38269	0.0695388	7.2308	0.0687193	6.84375	0.0849991	6.97752	0.0712193	7.12485	0.0730191	6.6336	0.0708157	6.55161	0.0741989	6.46821	0.0757592	6.53692	0.0814592	6.00344	0.0626565	5.9221	0.0725596	6.40791	0.0766794	4.86869	0.0722478	5.76308	0.0719395	5.9598	0.0755193	5.80224	0.0751796	5.67169	0.0726789
		4.94805	0.08156	6.8714	0.0682403			3.21543	0.190603	9.51475	0.0745746	9.11577	0.0762194	8.03858	0.0689284	7.42942	0.0694612	7.29395	0.0686746	6.89655	0.0849403	7.06714	0.0711746	7.23589	0.0729627	6.66223	0.0707952	6.60066	0.0741284	6.53168	0.0757075	6.59631	0.0814075	6.17284	0.0624284	5.95238	0.0725314	6.4683	0.0766418	4.97512	0.0722334	5.79374	0.071909	6.00601	0.0754746	5.82751	0.0751537	5.71102	0.072606
		5.78035	0.0908	7.78202	0.0651539			3.26014	0.190718	9.5807	0.0746193	9.17325	0.0762594	8.15961	0.0689989	7.47615	0.0695388	7.35709	0.0687193	6.94936	0.0849991	7.15675	0.0712193	7.34693	0.0730191	6.69085	0.0708157	6.64971	0.0741989	6.59515	0.0757592	6.65569	0.0814592	6.34224	0.0626565	5.98267	0.0725596	6.5287	0.0766794	5.08156	0.0722478	5.82441	0.0719395	6.05221	0.0755193	5.85277	0.0751796	5.75036	0.0726789
		5.54939	0.0879	8.95054	0.0622515			3.30313	0.19106	9.64411	0.0747516	9.22852	0.0763778	8.27598	0.0692079	7.52109	0.0697687	7.41781	0.0688516	7.00014	0.0851732	7.24293	0.0713516	7.4537	0.0731863	6.71837	0.0708763	6.69687	0.0744079	6.65618	0.0759124	6.71279	0.0816124	6.50514	0.0633321	6.01179	0.0726431	6.58678	0.0767909	5.18391	0.0722903	5.85389	0.0720301	6.09665	0.0756516	5.87707	0.0752562	5.78818	0.0728948
		4.83092	0.0878	10.5044	0.059521			3.34275	0.191614	9.70256	0.0749665	9.27946	0.0765701	8.38323	0.0695472	7.5625	0.0701419	7.47377	0.0690665	7.04693	0.085456	7.32234	0.0715665	7.5521	0.0734577	6.74374	0.0709747	6.74034	0.0747472	6.71243	0.0761613	6.76542	0.0818613	6.65526	0.0644291	6.03863	0.0727789	6.6403	0.0769718	5.27823	0.0723593	5.88107	0.0721771	6.13759	0.0758665	5.89946	0.0753806	5.82304	0.0732454
		5.26039	0.095	12.6715	0.0569515			3.37747	0.192359	9.75378	0.0752557	9.3241	0.0768288	8.47724	0.0700038	7.5988	0.0706441	7.52282	0.0693557	7.08795	0.0858365	7.39195	0.0718557	7.63834	0.073823	6.76597	0.0711071	6.77844	0.0752038	6.76173	0.0764961	6.81154	0.0821961	6.78684	0.0659055	6.06215	0.0729615	6.68722	0.0772153	5.36091	0.0724521	5.90489	0.072375	6.17349	0.0761557	5.91908	0.075548	5.85359	0.0737172
		5.52486	0.0944	15.9039	0.0545325			3.40597	0.193268	9.79582	0.0756081	9.36074	0.0771441	8.55438	0.0705602	7.62859	0.0712562	7.56307	0.0697081	7.12161	0.0863001	7.44908	0.0722081	7.70913	0.0742681	6.78422	0.0712684	6.8097	0.0757602	6.80219	0.0769041	6.8494	0.0826041	6.89483	0.0677045	6.08146	0.0731841	6.72572	0.0775121	5.42876	0.0725652	5.92443	0.0726161	6.20294	0.0765081	5.93519	0.0757521	5.87867	0.0742922
		4.363	0.1019	21.2417	0.0522543			3.42715	0.194305	9.82706	0.0760101	9.38797	0.0775038	8.61171	0.0711949	7.65073	0.0719544	7.59298	0.0701101	7.14663	0.0868291	7.49153	0.0726101	7.76172	0.0747759	6.79778	0.0714525	6.83294	0.0763949	6.83226	0.0773696	6.87753	0.0830696	6.97507	0.0697569	6.0958	0.073438	6.75433	0.0778506	5.47917	0.0726943	5.93896	0.0728911	6.22483	0.0769101	5.94716	0.0759848	5.8973	0.0749481
		4.45236	0.0918	31.7347	0.0501079			3.44019	0.19543	9.8463	0.0764463	9.40474	0.0778941	8.64701	0.0718837	7.66436	0.0727121	7.6114	0.0705463	7.16203	0.0874031	7.51767	0.0730463	7.79411	0.075327	6.80613	0.0716523	6.84725	0.0770837	6.85077	0.0778747	6.89485	0.0835747	7.02449	0.071984	6.10464	0.0737135	6.77195	0.078218	5.51022	0.0728344	5.9479	0.0731896	6.23831	0.0773463	5.95453	0.0762374	5.90877	0.0756598
		6.06061	0.0918	35	0.0498883			3.44459	0.1966	9.85279	0.0769	9.4104	0.0783	8.65893	0.0726	7.66896	0.0735	7.61762	0.071	7.16723	0.088	7.5265	0.0735	7.80505	0.0759	6.80895	0.07186	6.85208	0.0778	6.85702	0.0784	6.9007	0.0841	7.04117	0.0743	6.10762	0.074	6.77789	0.0786	5.5207	0.07298	5.95092	0.0735	6.24286	0.0778	5.95701	0.0765	5.91265	0.0764
		3.81971	0.0903	IsoLine	IsoLine			ErrEll	ErrEll	ErrEll	ErrEll	ErrEll	ErrEll	ErrEll	ErrEll	ErrEll	ErrEll	ErrEll	ErrEll	ErrEll	ErrEll	ErrEll	ErrEll	ErrEll	ErrEll	ErrEll	ErrEll	ErrEll	ErrEll	ErrEll	ErrEll	ErrEll	ErrEll	ErrEll	ErrEll	ErrEll	ErrEll	ErrEll	ErrEll	ErrEll	ErrEll	ErrEll	ErrEll	ErrEll	ErrEll	ErrEll	ErrEll	ErrEll	ErrEll
		4.74834	0.0974
		5.1573	0.0952
		4.57038	0.0966
		4.22119	0.0989
		4.40723	0.0965
		3.98724	0.0971
		3.84025	0.0984
		3.93701	0.107
		4.5045	0.0985
		3.93082	0.1023
		3.72856	0.1001
		3.63108	0.0999
		3.7037	0.1004
		4.99002	0.1027
		3.64033	0.0999
		3.53232	0.102
		3.80084	0.1061
		3.18066	0.1055
		3.36247	0.1114
		3.38868	0.1114
		2.57865	0.1462
		2.7248	0.1812
		1.97394	0.1892
		IsoLine	IsoLine
[truncated: 72 more columns]

## Sheet: PlotDat3
		6.05694	0.0792	1.6071	0.24	31.7347	0.0501079	6.37801	0.0792	5.95366	0.0798	5.7205	0.0797	6.38352	0.0912	5.3359	0.07792	5.13087	0.0791	4.85906	0.0795	5.185	0.0853	5.15603	0.0874	4.65886	0.0922	4.62154	0.0867	4.73068	0.0914	4.3777	0.0929	4.10289	0.09486	3.98855	0.1011	3.9682	0.1006	4.66198	0.0982	4.20954	0.098	3.9788	0.0977	4.0684	0.0997	4.03263	0.0991
		5.64653	0.0798	1.62168	0.236498	15.6212	0.0547005	6.37184	0.0796775	5.94776	0.0803492	5.71662	0.0800581	6.37004	0.0928475	5.33371	0.0781421	5.12874	0.0794581	4.85663	0.0799059	5.18164	0.0855865	5.15156	0.0878298	4.65672	0.0927253	4.61956	0.0869865	4.72704	0.0916865	4.3717	0.0935685	4.10101	0.0950916	3.98689	0.101506	3.96616	0.101006	4.65417	0.0986775	4.20491	0.0983581	3.9753	0.0980343	4.0659	0.10001	4.02905	0.0995059
		5.51876	0.0797	1.68745	0.222656	10.2518	0.059901	6.35357	0.0801367	5.93028	0.0808772	5.70514	0.0804025	6.33011	0.0944317	5.32723	0.0783556	5.12244	0.0798025	4.84943	0.0802962	5.17168	0.085862	5.13834	0.088243	4.65038	0.0932304	4.61371	0.087262	4.71627	0.091962	4.3539	0.0942114	4.09543	0.0953143	3.98194	0.101896	3.96015	0.101396	4.63103	0.0991367	4.19118	0.0987025	3.96493	0.0983557	4.05851	0.100309	4.01844	0.0998962
		5.68182	0.0912	1.75767	0.209729	7.56836	0.0657994	6.3239	0.0805599	5.9019	0.0813639	5.6865	0.0807199	6.26526	0.0958916	5.31669	0.0785524	5.1122	0.0801199	4.83775	0.0806559	5.15551	0.0861159	5.11687	0.0886239	4.6401	0.0936959	4.60422	0.0875159	4.69877	0.0922159	4.32501	0.0948039	4.08636	0.0955195	3.97391	0.102256	3.95038	0.101756	4.59345	0.0995599	4.16888	0.0990199	3.94808	0.0986519	4.04651	0.100584	4.0012	0.100256
		5.22193	0.07792	1.8328	0.197651	5.95934	0.0724996	6.28397	0.0809308	5.8637	0.0817904	5.66141	0.0809981	6.178	0.0971713	5.30252	0.0787248	5.09842	0.0803981	4.82202	0.0809712	5.13375	0.0863385	5.08798	0.0889577	4.62625	0.0941039	4.59143	0.0877385	4.67522	0.0924385	4.28613	0.0953231	4.07416	0.0956994	3.96311	0.102571	3.93724	0.102071	4.54287	0.0999308	4.13887	0.0992981	3.92541	0.0989116	4.03037	0.100825	3.97801	0.100571
		5.02008	0.0791	1.91338	0.186365	4.88752	0.0801223	6.23532	0.0812352	5.81716	0.0821405	5.63084	0.0812264	6.07166	0.0982215	5.28525	0.0788664	5.08163	0.0806264	4.80286	0.0812299	5.10723	0.0865211	5.05277	0.0892317	4.60938	0.0944387	4.57586	0.0879211	4.64653	0.0926211	4.23875	0.0957493	4.0593	0.0958471	3.94994	0.10283	3.92122	0.10233	4.48125	0.100235	4.10231	0.0995264	3.89778	0.0991247	4.01069	0.101023	3.94976	0.10083
		4.73261	0.0795	2	0.175816	4.12267	0.088807	6.17981	0.0814614	5.76406	0.0824006	5.59596	0.0813961	5.95035	0.0990019	5.26555	0.0789716	5.06248	0.0807961	4.781	0.0814222	5.07698	0.0866569	5.0126	0.0894353	4.59013	0.0946876	4.55809	0.0880569	4.61379	0.0927569	4.18469	0.096066	4.04234	0.0959568	3.93492	0.103022	3.90294	0.102522	4.41094	0.100461	4.06059	0.0996961	3.86627	0.099283	3.98825	0.10117	3.91752	0.101022
		5.01002	0.0853	2.09336	0.165954	3.54967	0.0987156	6.11957	0.0816007	5.70645	0.0825608	5.55812	0.0815005	5.81871	0.0994825	5.24417	0.0790363	5.04169	0.0809005	4.75728	0.0815406	5.04416	0.0867404	4.96901	0.0895606	4.56924	0.0948408	4.53881	0.0881404	4.57827	0.0928404	4.12604	0.096261	4.02394	0.0960243	3.91863	0.103141	3.88312	0.102641	4.33466	0.100601	4.01533	0.0998005	3.83207	0.0993805	3.96389	0.10126	3.88253	0.101141
		4.92368	0.0874	2.19427	0.15673	3.10458	0.110036	6.05694	0.0816477	5.64653	0.0826149	5.51876	0.0815358	5.68182	0.0996447	5.22193	0.0790582	5.02008	0.0809358	4.73261	0.0815806	5.01002	0.0867686	4.92368	0.089603	4.54752	0.0948925	4.51875	0.0881686	4.54133	0.0928686	4.06504	0.0963268	4.00481	0.0960472	3.90168	0.103181	3.8625	0.102681	4.25532	0.100648	3.96825	0.0998358	3.79651	0.0994134	3.93856	0.101291	3.84615	0.101181
		4.54752	0.0922	2.30366	0.148103	2.74902	0.122987	5.9943	0.0816007	5.58661	0.0825608	5.47941	0.0815005	5.54492	0.0994825	5.1997	0.0790363	4.99847	0.0809005	4.70794	0.0815406	4.97588	0.0867404	4.87835	0.0895606	4.5258	0.0948408	4.4987	0.0881404	4.50438	0.0928404	4.00404	0.096261	3.98567	0.0960243	3.88473	0.103141	3.84187	0.102641	4.17598	0.100601	3.92118	0.0998005	3.76094	0.0993805	3.91323	0.10126	3.80977	0.101141
		4.51875	0.0867	2.42264	0.140031	2.45857	0.137821	5.93406	0.0814614	5.52899	0.0824006	5.44156	0.0813961	5.41329	0.0990019	5.17832	0.0789716	4.97768	0.0807961	4.68422	0.0814222	4.94306	0.0866569	4.83477	0.0894353	4.50492	0.0946876	4.47942	0.0880569	4.46886	0.0927569	3.94539	0.096066	3.96727	0.0959568	3.86843	0.103022	3.82205	0.102522	4.0997	0.100461	3.87592	0.0996961	3.72675	0.099283	3.88887	0.10117	3.77479	0.101022
		4.54133	0.0914	2.55251	0.132475	2.21696	0.154833	5.87855	0.0812352	5.47589	0.0821405	5.40669	0.0812264	5.29197	0.0982215	5.15861	0.0788664	4.95853	0.0806264	4.66236	0.0812299	4.91281	0.0865211	4.7946	0.0892317	4.48567	0.0944387	4.46165	0.0879211	4.43613	0.0926211	3.89134	0.0957493	3.95031	0.0958471	3.85341	0.10283	3.80377	0.10233	4.02939	0.100235	3.8342	0.0995264	3.69523	0.0991247	3.86642	0.101023	3.74255	0.10083
		4.06504	0.0929	2.69483	0.125402	2.01291	0.174366	5.8299	0.0809308	5.42935	0.0817904	5.37612	0.0809981	5.18564	0.0971713	5.14134	0.0787248	4.94174	0.0803981	4.64319	0.0809712	4.88629	0.0863385	4.75939	0.0889577	4.46879	0.0941039	4.44607	0.0877385	4.40743	0.0924385	3.84396	0.0953231	3.93545	0.0956994	3.84025	0.102571	3.78775	0.102071	3.96776	0.0999308	3.79764	0.0992981	3.66761	0.0989116	3.84675	0.100825	3.71429	0.100571
		4.00481	0.09486	2.85146	0.118779	1.83837	0.196819	5.78997	0.0805599	5.39115	0.0813639	5.35103	0.0807199	5.09837	0.0958916	5.12717	0.0785524	4.92796	0.0801199	4.62747	0.0806559	4.86453	0.0861159	4.73049	0.0886239	4.45495	0.0936959	4.43329	0.0875159	4.38388	0.0922159	3.80507	0.0948039	3.92325	0.0955195	3.82944	0.102256	3.77461	0.101756	3.91719	0.0995599	3.76763	0.0990199	3.64493	0.0986519	3.8306	0.100584	3.6911	0.100256
		3.90168	0.1011	3.02463	0.112574	1.68745	0.222656	5.7603	0.0801367	5.36277	0.0808772	5.33239	0.0804025	5.03353	0.0944317	5.11664	0.0783556	4.91772	0.0798025	4.61578	0.0802962	4.84836	0.085862	4.70902	0.088243	4.44466	0.0932304	4.42379	0.087262	4.36638	0.091962	3.77618	0.0942114	3.91419	0.0953143	3.82141	0.101896	3.76484	0.101396	3.87961	0.0991367	3.74533	0.0987025	3.62809	0.0983557	3.8186	0.100309	3.67387	0.0998962
		3.8625	0.1006	3.21711	0.10676	IsoLine	IsoLine	5.74203	0.0796775	5.34529	0.0803492	5.32091	0.0800581	4.9936	0.0928475	5.11015	0.0781421	4.91142	0.0794581	4.60859	0.0799059	4.8384	0.0855865	4.6958	0.0878298	4.43832	0.0927253	4.41794	0.0869865	4.35561	0.0916865	3.75839	0.0935685	3.9086	0.0950916	3.81647	0.101506	3.75883	0.101006	3.85647	0.0986775	3.7316	0.0983581	3.61772	0.0980343	3.81121	0.10001	3.66326	0.0995059
		4.25532	0.0982	3.43229	0.101311			5.73586	0.0792	5.33939	0.0798	5.31703	0.0797	4.98011	0.0912	5.10796	0.07792	4.90929	0.0791	4.60616	0.0795	4.83504	0.0853	4.69134	0.0874	4.43618	0.0922	4.41597	0.0867	4.35197	0.0914	3.75238	0.0929	3.90672	0.09486	3.8148	0.1011	3.75679	0.1006	3.84865	0.0982	3.72696	0.098	3.61421	0.0977	3.80872	0.0997	3.65968	0.0991
		3.96825	0.098	3.6744	0.0962022			5.74203	0.0787225	5.34529	0.0792508	5.32091	0.0793419	4.9936	0.0895525	5.11015	0.0776979	4.91142	0.0787419	4.60859	0.0790941	4.8384	0.0850135	4.6958	0.0869702	4.43832	0.0916747	4.41794	0.0864135	4.35561	0.0911135	3.75839	0.0922315	3.9086	0.0946284	3.81647	0.100694	3.75883	0.100194	3.85647	0.0977225	3.7316	0.0976419	3.61772	0.0973657	3.81121	0.0993896	3.66326	0.0986941
		3.79651	0.0977	3.9488	0.0914107			5.7603	0.0782633	5.36277	0.0787228	5.33239	0.0789975	5.03353	0.0879683	5.11664	0.0774844	4.91772	0.0783975	4.61578	0.0787038	4.84836	0.084738	4.70902	0.086557	4.44466	0.0911696	4.42379	0.086138	4.36638	0.090838	3.77618	0.0915886	3.91419	0.0944057	3.82141	0.100304	3.76484	0.0998038	3.87961	0.0972633	3.74533	0.0972975	3.62809	0.0970443	3.8186	0.0990911	3.67387	0.0983038
		3.93856	0.0997	4.26237	0.0869154			5.78997	0.0778401	5.39115	0.0782361	5.35103	0.0786801	5.09837	0.0865084	5.12717	0.0772876	4.92796	0.0780801	4.62747	0.0783441	4.86453	0.0844841	4.73049	0.0861761	4.45495	0.0907041	4.43329	0.0858841	4.38388	0.0905841	3.80507	0.0909961	3.92325	0.0942005	3.82944	0.0999441	3.77461	0.0994441	3.91719	0.0968401	3.76763	0.0969801	3.64493	0.0967481	3.8306	0.0988161	3.6911	0.0979441
		3.84615	0.0991	4.62412	0.0826968			5.8299	0.0774692	5.42935	0.0778096	5.37612	0.0784019	5.18564	0.0852287	5.14134	0.0771152	4.94174	0.0778019	4.64319	0.0780288	4.88629	0.0842615	4.75939	0.0858423	4.46879	0.0902961	4.44607	0.0856615	4.40743	0.0903615	3.84396	0.0904769	3.93545	0.0940206	3.84025	0.0996288	3.78775	0.0991288	3.96776	0.0964692	3.79764	0.0967019	3.66761	0.0964884	3.84675	0.098575	3.71429	0.0976288
		3.72856	0.1033	5.04601	0.0787364			5.87855	0.0771648	5.47589	0.0774595	5.40669	0.0781736	5.29197	0.0841785	5.15861	0.0769736	4.95853	0.0775736	4.66236	0.0777701	4.91281	0.0840789	4.7946	0.0855683	4.48567	0.0899613	4.46165	0.0854789	4.43613	0.0901789	3.89134	0.0900507	3.95031	0.0938729	3.85341	0.0993701	3.80377	0.0988701	4.02939	0.0961648	3.8342	0.0964736	3.69523	0.0962753	3.86642	0.0983771	3.74255	0.0973701
		3.89105	0.1011	5.54433	0.0750173			5.93406	0.0769386	5.52899	0.0771994	5.44156	0.0780039	5.41329	0.0833981	5.17832	0.0768684	4.97768	0.0774039	4.68422	0.0775778	4.94306	0.0839431	4.83477	0.0853647	4.50492	0.0897124	4.47942	0.0853431	4.46886	0.0900431	3.94539	0.089734	3.96727	0.0937632	3.86843	0.0991778	3.82205	0.0986778	4.0997	0.0959386	3.87592	0.0963039	3.72675	0.096117	3.88887	0.0982301	3.77479	0.0971778
		3.8432	0.10006	6.14186	0.0715235			5.9943	0.0767993	5.58661	0.0770392	5.47941	0.0778995	5.54492	0.0829175	5.1997	0.0768037	4.99847	0.0772995	4.70794	0.0774594	4.97588	0.0838596	4.87835	0.0852394	4.5258	0.0895592	4.4987	0.0852596	4.50438	0.0899596	4.00404	0.089539	3.98567	0.0936957	3.88473	0.0990594	3.84187	0.0985594	4.17598	0.0957993	3.92118	0.0961995	3.76094	0.0960195	3.91323	0.0981395	3.80977	0.0970594
		4.49843	0.0925	6.8714	0.0682403			6.05694	0.0767523	5.64653	0.0769851	5.51876	0.0778642	5.68182	0.0827553	5.22193	0.0767818	5.02008	0.0772642	4.73261	0.0774194	5.01002	0.0838314	4.92368	0.085197	4.54752	0.0895075	4.51875	0.0852314	4.54133	0.0899314	4.06504	0.0894732	4.00481	0.0936728	3.90168	0.0990194	3.8625	0.0985194	4.25532	0.0957523	3.96825	0.0961642	3.79651	0.0959866	3.93856	0.098109	3.84615	0.0970194
		3.99361	0.1013	7.78202	0.0651539			6.11957	0.0767993	5.70645	0.0770392	5.55812	0.0778995	5.81871	0.0829175	5.24417	0.0768037	5.04169	0.0772995	4.75728	0.0774594	5.04416	0.0838596	4.96901	0.0852394	4.56924	0.0895592	4.53881	0.0852596	4.57827	0.0899596	4.12604	0.089539	4.02394	0.0936957	3.91863	0.0990594	3.88312	0.0985594	4.33466	0.0957993	4.01533	0.0961995	3.83207	0.0960195	3.96389	0.0981395	3.88253	0.0970594
		3.98883	0.1009	8.95054	0.0622515			6.17981	0.0769386	5.76406	0.0771994	5.59596	0.0780039	5.95035	0.0833981	5.26555	0.0768684	5.06248	0.0774039	4.781	0.0775778	5.07698	0.0839431	5.0126	0.0853647	4.59013	0.0897124	4.55809	0.0853431	4.61379	0.0900431	4.18469	0.089734	4.04234	0.0937632	3.93492	0.0991778	3.90294	0.0986778	4.41094	0.0959386	4.06059	0.0963039	3.86627	0.096117	3.98825	0.0982301	3.91752	0.0971778
		4.29185	0.0969	10.5044	0.059521			6.23532	0.0771648	5.81716	0.0774595	5.63084	0.0781736	6.07166	0.0841785	5.28525	0.0769736	5.08163	0.0775736	4.80286	0.0777701	5.10723	0.0840789	5.05277	0.0855683	4.60938	0.0899613	4.57586	0.0854789	4.64653	0.0901789	4.23875	0.0900507	4.0593	0.0938729	3.94994	0.0993701	3.92122	0.0988701	4.48125	0.0961648	4.10231	0.0964736	3.89778	0.0962753	4.01069	0.0983771	3.94976	0.0973701
		4.29738	0.09732	12.6715	0.0569515			6.28397	0.0774692	5.8637	0.0778096	5.66141	0.0784019	6.178	0.0852287	5.30252	0.0771152	5.09842	0.0778019	4.82202	0.0780288	5.13375	0.0842615	5.08798	0.0858423	4.62625	0.0902961	4.59143	0.0856615	4.67522	0.0903615	4.28613	0.0904769	4.07416	0.0940206	3.96311	0.0996288	3.93724	0.0991288	4.54287	0.0964692	4.13887	0.0967019	3.92541	0.0964884	4.03037	0.098575	3.97801	0.0976288
		4.3554	0.1002	15.9039	0.0545325			6.3239	0.0778401	5.9019	0.0782361	5.6865	0.0786801	6.26526	0.0865084	5.31669	0.0772876	5.1122	0.0780801	4.83775	0.0783441	5.15551	0.0844841	5.11687	0.0861761	4.6401	0.0907041	4.60422	0.0858841	4.69877	0.0905841	4.32501	0.0909961	4.08636	0.0942005	3.97391	0.0999441	3.95038	0.0994441	4.59345	0.0968401	4.16888	0.0969801	3.94808	0.0967481	4.04651	0.0988161	4.0012	0.0979441
		4.82625	0.0902	21.2417	0.0522543			6.35357	0.0782633	5.93028	0.0787228	5.70514	0.0789975	6.33011	0.0879683	5.32723	0.0774844	5.12244	0.0783975	4.84943	0.0787038	5.17168	0.084738	5.13834	0.086557	4.65038	0.0911696	4.61371	0.086138	4.71627	0.090838	4.3539	0.0915886	4.09543	0.0944057	3.98194	0.100304	3.96015	0.0998038	4.63103	0.0972633	4.19118	0.0972975	3.96493	0.0970443	4.05851	0.0990911	4.01844	0.0983038
		3.56761	0.1127	31.7347	0.0501079			6.37184	0.0787225	5.94776	0.0792508	5.71662	0.0793419	6.37004	0.0895525	5.33371	0.0776979	5.12874	0.0787419	4.85663	0.0790941	5.18164	0.0850135	5.15156	0.0869702	4.65672	0.0916747	4.61956	0.0864135	4.72704	0.0911135	4.3717	0.0922315	4.10101	0.0946284	3.98689	0.100694	3.96616	0.100194	4.65417	0.0977225	4.20491	0.0976419	3.9753	0.0973657	4.0659	0.0993896	4.02905	0.0986941
		5.5991	0.0879	35	0.0498883			6.37801	0.0792	5.95366	0.0798	5.7205	0.0797	6.38352	0.0912	5.3359	0.07792	5.13087	0.0791	4.85906	0.0795	5.185	0.0853	5.15603	0.0874	4.65886	0.0922	4.62154	0.0867	4.73068	0.0914	4.3777	0.0929	4.10289	0.09486	3.98855	0.1011	3.9682	0.1006	4.66198	0.0982	4.20954	0.098	3.9788	0.0977	4.0684	0.0997	4.03263	0.0991
		6.64894	0.0769	IsoLine	IsoLine
		4.12711	0.1024
		3.61925	0.1138
		4.58505	0.0989
		4.7619	0.0926
		4.28633	0.10011
		2.46002	0.1742
		6.19579	0.0847
		4.65116	0.1034
		5.07614	0.1002
		9.38086	0.0721
		6.48088	0.0907
		7.0373	0.1149
		8.1367	0.0976
		3.11526	0.0975
		3.61272	0.0997
		3.4965	0.0988
		3.32557	0.10045
		3.29489	0.09961
		3.47343	0.1015
		3.18471	0.10078
		3.75375	0.10474
		3.23102	0.10635
		2.88767	0.1214
		2.90698	0.1263
		7.83085	0.0697
		3.89105	0.133
		IsoLine	IsoLine
[truncated: 78 more columns]

## Sheet: PlotDat4
Source sheet	All U-Pb data	6.05694	0.0792	1.6071	0.24	31.7347	0.0501079	6.37801	0.0792	5.95366	0.0798	5.7205	0.0797	6.38352	0.0912	5.3359	0.07792	5.13087	0.0791	4.85906	0.0795	5.185	0.0853	5.15603	0.0874	4.65886	0.0922	4.62154	0.0867	4.73068	0.0914	4.3777	0.0929	4.10289	0.09486	3.98855	0.1011	3.9682	0.1006	4.66198	0.0982	4.20954	0.098	3.9788	0.0977	4.0684	0.0997	4.03263	0.0991
Plot name	Concordia4	5.64653	0.0798	1.62168	0.236498	15.6212	0.0547005	6.37184	0.0796775	5.94776	0.0803492	5.71662	0.0800581	6.37004	0.0928475	5.33371	0.0781421	5.12874	0.0794581	4.85663	0.0799059	5.18164	0.0855865	5.15156	0.0878298	4.65672	0.0927253	4.61956	0.0869865	4.72704	0.0916865	4.3717	0.0935685	4.10101	0.0950916	3.98689	0.101506	3.96616	0.101006	4.65417	0.0986775	4.20491	0.0983581	3.9753	0.0980343	4.0659	0.10001	4.02905	0.0995059
Plot Type	1	5.51876	0.0797	1.68745	0.222656	10.2518	0.059901	6.35357	0.0801367	5.93028	0.0808772	5.70514	0.0804025	6.33011	0.0944317	5.32723	0.0783556	5.12244	0.0798025	4.84943	0.0802962	5.17168	0.085862	5.13834	0.088243	4.65038	0.0932304	4.61371	0.087262	4.71627	0.091962	4.3539	0.0942114	4.09543	0.0953143	3.98194	0.101896	3.96015	0.101396	4.63103	0.0991367	4.19118	0.0987025	3.96493	0.0983557	4.05851	0.100309	4.01844	0.0998962
1st free col	129	5.68182	0.0912	1.75767	0.209729	7.56836	0.0657994	6.3239	0.0805599	5.9019	0.0813639	5.6865	0.0807199	6.26526	0.0958916	5.31669	0.0785524	5.1122	0.0801199	4.83775	0.0806559	5.15551	0.0861159	5.11687	0.0886239	4.6401	0.0936959	4.60422	0.0875159	4.69877	0.0922159	4.32501	0.0948039	4.08636	0.0955195	3.97391	0.102256	3.95038	0.101756	4.59345	0.0995599	4.16888	0.0990199	3.94808	0.0986519	4.04651	0.100584	4.0012	0.100256
Sigma Level	2	5.22193	0.07792	1.8328	0.197651	5.95934	0.0724996	6.28397	0.0809308	5.8637	0.0817904	5.66141	0.0809981	6.178	0.0971713	5.30252	0.0787248	5.09842	0.0803981	4.82202	0.0809712	5.13375	0.0863385	5.08798	0.0889577	4.62625	0.0941039	4.59143	0.0877385	4.67522	0.0924385	4.28613	0.0953231	4.07416	0.0956994	3.96311	0.102571	3.93724	0.102071	4.54287	0.0999308	4.13887	0.0992981	3.92541	0.0989116	4.03037	0.100825	3.97801	0.100571
Absolute Errs	TRUE	5.02008	0.0791	1.91338	0.186365	4.88752	0.0801223	6.23532	0.0812352	5.81716	0.0821405	5.63084	0.0812264	6.07166	0.0982215	5.28525	0.0788664	5.08163	0.0806264	4.80286	0.0812299	5.10723	0.0865211	5.05277	0.0892317	4.60938	0.0944387	4.57586	0.0879211	4.64653	0.0926211	4.23875	0.0957493	4.0593	0.0958471	3.94994	0.10283	3.92122	0.10233	4.48125	0.100235	4.10231	0.0995264	3.89778	0.0991247	4.01069	0.101023	3.94976	0.10083
Symbol Type	1	4.73261	0.0795	2	0.175816	4.12267	0.088807	6.17981	0.0814614	5.76406	0.0824006	5.59596	0.0813961	5.95035	0.0990019	5.26555	0.0789716	5.06248	0.0807961	4.781	0.0814222	5.07698	0.0866569	5.0126	0.0894353	4.59013	0.0946876	4.55809	0.0880569	4.61379	0.0927569	4.18469	0.096066	4.04234	0.0959568	3.93492	0.103022	3.90294	0.102522	4.41094	0.100461	4.06059	0.0996961	3.86627	0.099283	3.98825	0.10117	3.91752	0.101022
Inverse Plot	TRUE	5.01002	0.0853	2.09336	0.165954	3.54967	0.0987156	6.11957	0.0816007	5.70645	0.0825608	5.55812	0.0815005	5.81871	0.0994825	5.24417	0.0790363	5.04169	0.0809005	4.75728	0.0815406	5.04416	0.0867404	4.96901	0.0895606	4.56924	0.0948408	4.53881	0.0881404	4.57827	0.0928404	4.12604	0.096261	4.02394	0.0960243	3.91863	0.103141	3.88312	0.102641	4.33466	0.100601	4.01533	0.0998005	3.83207	0.0993805	3.96389	0.10126	3.88253	0.101141
Color Plot	TRUE	4.92368	0.0874	2.19427	0.15673	3.10458	0.110036	6.05694	0.0816477	5.64653	0.0826149	5.51876	0.0815358	5.68182	0.0996447	5.22193	0.0790582	5.02008	0.0809358	4.73261	0.0815806	5.01002	0.0867686	4.92368	0.089603	4.54752	0.0948925	4.51875	0.0881686	4.54133	0.0928686	4.06504	0.0963268	4.00481	0.0960472	3.90168	0.103181	3.8625	0.102681	4.25532	0.100648	3.96825	0.0998358	3.79651	0.0994134	3.93856	0.101291	3.84615	0.101181
3D plot	FALSE	4.54752	0.0922	2.30366	0.148103	2.74902	0.122987	5.9943	0.0816007	5.58661	0.0825608	5.47941	0.0815005	5.54492	0.0994825	5.1997	0.0790363	4.99847	0.0809005	4.70794	0.0815406	4.97588	0.0867404	4.87835	0.0895606	4.5258	0.0948408	4.4987	0.0881404	4.50438	0.0928404	4.00404	0.096261	3.98567	0.0960243	3.88473	0.103141	3.84187	0.102641	4.17598	0.100601	3.92118	0.0998005	3.76094	0.0993805	3.91323	0.10126	3.80977	0.101141
Linear	FALSE	4.51875	0.0867	2.42264	0.140031	2.45857	0.137821	5.93406	0.0814614	5.52899	0.0824006	5.44156	0.0813961	5.41329	0.0990019	5.17832	0.0789716	4.97768	0.0807961	4.68422	0.0814222	4.94306	0.0866569	4.83477	0.0894353	4.50492	0.0946876	4.47942	0.0880569	4.46886	0.0927569	3.94539	0.096066	3.96727	0.0959568	3.86843	0.103022	3.82205	0.102522	4.0997	0.100461	3.87592	0.0996961	3.72675	0.099283	3.88887	0.10117	3.77479	0.101022
Data Range	C61:F120	4.54133	0.0914	2.55251	0.132475	2.21696	0.154833	5.87855	0.0812352	5.47589	0.0821405	5.40669	0.0812264	5.29197	0.0982215	5.15861	0.0788664	4.95853	0.0806264	4.66236	0.0812299	4.91281	0.0865211	4.7946	0.0892317	4.48567	0.0944387	4.46165	0.0879211	4.43613	0.0926211	3.89134	0.0957493	3.95031	0.0958471	3.85341	0.10283	3.80377	0.10233	4.02939	0.100235	3.8342	0.0995264	3.69523	0.0991247	3.86642	0.101023	3.74255	0.10083
Filled Symbols	TRUE	4.06504	0.0929	2.69483	0.125402	2.01291	0.174366	5.8299	0.0809308	5.42935	0.0817904	5.37612	0.0809981	5.18564	0.0971713	5.14134	0.0787248	4.94174	0.0803981	4.64319	0.0809712	4.88629	0.0863385	4.75939	0.0889577	4.46879	0.0941039	4.44607	0.0877385	4.40743	0.0924385	3.84396	0.0953231	3.93545	0.0956994	3.84025	0.102571	3.78775	0.102071	3.96776	0.0999308	3.79764	0.0992981	3.66761	0.0989116	3.84675	0.100825	3.71429	0.100571
ConcAge	FALSE	4.00481	0.09486	2.85146	0.118779	1.83837	0.196819	5.78997	0.0805599	5.39115	0.0813639	5.35103	0.0807199	5.09837	0.0958916	5.12717	0.0785524	4.92796	0.0801199	4.62747	0.0806559	4.86453	0.0861159	4.73049	0.0886239	4.45495	0.0936959	4.43329	0.0875159	4.38388	0.0922159	3.80507	0.0948039	3.92325	0.0955195	3.82944	0.102256	3.77461	0.101756	3.91719	0.0995599	3.76763	0.0990199	3.64493	0.0986519	3.8306	0.100584	3.6911	0.100256
ConcSwap	FALSE	3.90168	0.1011	3.02463	0.112574	1.68745	0.222656	5.7603	0.0801367	5.36277	0.0808772	5.33239	0.0804025	5.03353	0.0944317	5.11664	0.0783556	4.91772	0.0798025	4.61578	0.0802962	4.84836	0.085862	4.70902	0.088243	4.44466	0.0932304	4.42379	0.087262	4.36638	0.091962	3.77618	0.0942114	3.91419	0.0953143	3.82141	0.101896	3.76484	0.101396	3.87961	0.0991367	3.74533	0.0987025	3.62809	0.0983557	3.8186	0.100309	3.67387	0.0998962
1st Symbol-row	1	3.8625	0.1006	3.21711	0.10676	IsoLine	IsoLine	5.74203	0.0796775	5.34529	0.0803492	5.32091	0.0800581	4.9936	0.0928475	5.11015	0.0781421	4.91142	0.0794581	4.60859	0.0799059	4.8384	0.0855865	4.6958	0.0878298	4.43832	0.0927253	4.41794	0.0869865	4.35561	0.0916865	3.75839	0.0935685	3.9086	0.0950916	3.81647	0.101506	3.75883	0.101006	3.85647	0.0986775	3.7316	0.0983581	3.61772	0.0980343	3.81121	0.10001	3.66326	0.0995059
		4.25532	0.0982	3.43229	0.101311			5.73586	0.0792	5.33939	0.0798	5.31703	0.0797	4.98011	0.0912	5.10796	0.07792	4.90929	0.0791	4.60616	0.0795	4.83504	0.0853	4.69134	0.0874	4.43618	0.0922	4.41597	0.0867	4.35197	0.0914	3.75238	0.0929	3.90672	0.09486	3.8148	0.1011	3.75679	0.1006	3.84865	0.0982	3.72696	0.098	3.61421	0.0977	3.80872	0.0997	3.65968	0.0991
		3.96825	0.098	3.6744	0.0962022			5.74203	0.0787225	5.34529	0.0792508	5.32091	0.0793419	4.9936	0.0895525	5.11015	0.0776979	4.91142	0.0787419	4.60859	0.0790941	4.8384	0.0850135	4.6958	0.0869702	4.43832	0.0916747	4.41794	0.0864135	4.35561	0.0911135	3.75839	0.0922315	3.9086	0.0946284	3.81647	0.100694	3.75883	0.100194	3.85647	0.0977225	3.7316	0.0976419	3.61772	0.0973657	3.81121	0.0993896	3.66326	0.0986941
		3.79651	0.0977	3.9488	0.0914107			5.7603	0.0782633	5.36277	0.0787228	5.33239	0.0789975	5.03353	0.0879683	5.11664	0.0774844	4.91772	0.0783975	4.61578	0.0787038	4.84836	0.084738	4.70902	0.086557	4.44466	0.0911696	4.42379	0.086138	4.36638	0.090838	3.77618	0.0915886	3.91419	0.0944057	3.82141	0.100304	3.76484	0.0998038	3.87961	0.0972633	3.74533	0.0972975	3.62809	0.0970443	3.8186	0.0990911	3.67387	0.0983038
		3.93856	0.0997	4.26237	0.0869154			5.78997	0.0778401	5.39115	0.0782361	5.35103	0.0786801	5.09837	0.0865084	5.12717	0.0772876	4.92796	0.0780801	4.62747	0.0783441	4.86453	0.0844841	4.73049	0.0861761	4.45495	0.0907041	4.43329	0.0858841	4.38388	0.0905841	3.80507	0.0909961	3.92325	0.0942005	3.82944	0.0999441	3.77461	0.0994441	3.91719	0.0968401	3.76763	0.0969801	3.64493	0.0967481	3.8306	0.0988161	3.6911	0.0979441
		3.84615	0.0991	4.62412	0.0826968			5.8299	0.0774692	5.42935	0.0778096	5.37612	0.0784019	5.18564	0.0852287	5.14134	0.0771152	4.94174	0.0778019	4.64319	0.0780288	4.88629	0.0842615	4.75939	0.0858423	4.46879	0.0902961	4.44607	0.0856615	4.40743	0.0903615	3.84396	0.0904769	3.93545	0.0940206	3.84025	0.0996288	3.78775	0.0991288	3.96776	0.0964692	3.79764	0.0967019	3.66761	0.0964884	3.84675	0.098575	3.71429	0.0976288
		3.72856	0.1033	5.04601	0.0787364			5.87855	0.0771648	5.47589	0.0774595	5.40669	0.0781736	5.29197	0.0841785	5.15861	0.0769736	4.95853	0.0775736	4.66236	0.0777701	4.91281	0.0840789	4.7946	0.0855683	4.48567	0.0899613	4.46165	0.0854789	4.43613	0.0901789	3.89134	0.0900507	3.95031	0.0938729	3.85341	0.0993701	3.80377	0.0988701	4.02939	0.0961648	3.8342	0.0964736	3.69523	0.0962753	3.86642	0.0983771	3.74255	0.0973701
		3.89105	0.1011	5.54433	0.0750173			5.93406	0.0769386	5.52899	0.0771994	5.44156	0.0780039	5.41329	0.0833981	5.17832	0.0768684	4.97768	0.0774039	4.68422	0.0775778	4.94306	0.0839431	4.83477	0.0853647	4.50492	0.0897124	4.47942	0.0853431	4.46886	0.0900431	3.94539	0.089734	3.96727	0.0937632	3.86843	0.0991778	3.82205	0.0986778	4.0997	0.0959386	3.87592	0.0963039	3.72675	0.096117	3.88887	0.0982301	3.77479	0.0971778
		3.8432	0.10006	6.14186	0.0715235			5.9943	0.0767993	5.58661	0.0770392	5.47941	0.0778995	5.54492	0.0829175	5.1997	0.0768037	4.99847	0.0772995	4.70794	0.0774594	4.97588	0.0838596	4.87835	0.0852394	4.5258	0.0895592	4.4987	0.0852596	4.50438	0.0899596	4.00404	0.089539	3.98567	0.0936957	3.88473	0.0990594	3.84187	0.0985594	4.17598	0.0957993	3.92118	0.0961995	3.76094	0.0960195	3.91323	0.0981395	3.80977	0.0970594
		4.49843	0.0925	6.8714	0.0682403			6.05694	0.0767523	5.64653	0.0769851	5.51876	0.0778642	5.68182	0.0827553	5.22193	0.0767818	5.02008	0.0772642	4.73261	0.0774194	5.01002	0.0838314	4.92368	0.085197	4.54752	0.0895075	4.51875	0.0852314	4.54133	0.0899314	4.06504	0.0894732	4.00481	0.0936728	3.90168	0.0990194	3.8625	0.0985194	4.25532	0.0957523	3.96825	0.0961642	3.79651	0.0959866	3.93856	0.098109	3.84615	0.0970194
		3.99361	0.1013	7.78202	0.0651539			6.11957	0.0767993	5.70645	0.0770392	5.55812	0.0778995	5.81871	0.0829175	5.24417	0.0768037	5.04169	0.0772995	4.75728	0.0774594	5.04416	0.0838596	4.96901	0.0852394	4.56924	0.0895592	4.53881	0.0852596	4.57827	0.0899596	4.12604	0.089539	4.02394	0.0936957	3.91863	0.0990594	3.88312	0.0985594	4.33466	0.0957993	4.01533	0.0961995	3.83207	0.0960195	3.96389	0.0981395	3.88253	0.0970594
		3.98883	0.1009	8.95054	0.0622515			6.17981	0.0769386	5.76406	0.0771994	5.59596	0.0780039	5.95035	0.0833981	5.26555	0.0768684	5.06248	0.0774039	4.781	0.0775778	5.07698	0.0839431	5.0126	0.0853647	4.59013	0.0897124	4.55809	0.0853431	4.61379	0.0900431	4.18469	0.089734	4.04234	0.0937632	3.93492	0.0991778	3.90294	0.0986778	4.41094	0.0959386	4.06059	0.0963039	3.86627	0.096117	3.98825	0.0982301	3.91752	0.0971778
		4.29185	0.0969	10.5044	0.059521			6.23532	0.0771648	5.81716	0.0774595	5.63084	0.0781736	6.07166	0.0841785	5.28525	0.0769736	5.08163	0.0775736	4.80286	0.0777701	5.10723	0.0840789	5.05277	0.0855683	4.60938	0.0899613	4.57586	0.0854789	4.64653	0.0901789	4.23875	0.0900507	4.0593	0.0938729	3.94994	0.0993701	3.92122	0.0988701	4.48125	0.0961648	4.10231	0.0964736	3.89778	0.0962753	4.01069	0.0983771	3.94976	0.0973701
		4.29738	0.09732	12.6715	0.0569515			6.28397	0.0774692	5.8637	0.0778096	5.66141	0.0784019	6.178	0.0852287	5.30252	0.0771152	5.09842	0.0778019	4.82202	0.0780288	5.13375	0.0842615	5.08798	0.0858423	4.62625	0.0902961	4.59143	0.0856615	4.67522	0.0903615	4.28613	0.0904769	4.07416	0.0940206	3.96311	0.0996288	3.93724	0.0991288	4.54287	0.0964692	4.13887	0.0967019	3.92541	0.0964884	4.03037	0.098575	3.97801	0.0976288
		4.3554	0.1002	15.9039	0.0545325			6.3239	0.0778401	5.9019	0.0782361	5.6865	0.0786801	6.26526	0.0865084	5.31669	0.0772876	5.1122	0.0780801	4.83775	0.0783441	5.15551	0.0844841	5.11687	0.0861761	4.6401	0.0907041	4.60422	0.0858841	4.69877	0.0905841	4.32501	0.0909961	4.08636	0.0942005	3.97391	0.0999441	3.95038	0.0994441	4.59345	0.0968401	4.16888	0.0969801	3.94808	0.0967481	4.04651	0.0988161	4.0012	0.0979441
		4.82625	0.0902	21.2417	0.0522543			6.35357	0.0782633	5.93028	0.0787228	5.70514	0.0789975	6.33011	0.0879683	5.32723	0.0774844	5.12244	0.0783975	4.84943	0.0787038	5.17168	0.084738	5.13834	0.086557	4.65038	0.0911696	4.61371	0.086138	4.71627	0.090838	4.3539	0.0915886	4.09543	0.0944057	3.98194	0.100304	3.96015	0.0998038	4.63103	0.0972633	4.19118	0.0972975	3.96493	0.0970443	4.05851	0.0990911	4.01844	0.0983038
		3.56761	0.1127	31.7347	0.0501079			6.37184	0.0787225	5.94776	0.0792508	5.71662	0.0793419	6.37004	0.0895525	5.33371	0.0776979	5.12874	0.0787419	4.85663	0.0790941	5.18164	0.0850135	5.15156	0.0869702	4.65672	0.0916747	4.61956	0.0864135	4.72704	0.0911135	4.3717	0.0922315	4.10101	0.0946284	3.98689	0.100694	3.96616	0.100194	4.65417	0.0977225	4.20491	0.0976419	3.9753	0.0973657	4.0659	0.0993896	4.02905	0.0986941
		5.5991	0.0879	35	0.0498883			6.37801	0.0792	5.95366	0.0798	5.7205	0.0797	6.38352	0.0912	5.3359	0.07792	5.13087	0.0791	4.85906	0.0795	5.185	0.0853	5.15603	0.0874	4.65886	0.0922	4.62154	0.0867	4.73068	0.0914	4.3777	0.0929	4.10289	0.09486	3.98855	0.1011	3.9682	0.1006	4.66198	0.0982	4.20954	0.098	3.9788	0.0977	4.0684	0.0997	4.03263	0.0991
		6.64894	0.0769	IsoLine	IsoLine			ErrEll	ErrEll	ErrEll	ErrEll	ErrEll	ErrEll	ErrEll	ErrEll	ErrEll	ErrEll	ErrEll	ErrEll	ErrEll	ErrEll	ErrEll	ErrEll	ErrEll	ErrEll	ErrEll	ErrEll	ErrEll	ErrEll	ErrEll	ErrEll	ErrEll	ErrEll	ErrEll	ErrEll	ErrEll	ErrEll	ErrEll	ErrEll	ErrEll	ErrEll	ErrEll	ErrEll	ErrEll	ErrEll	ErrEll	ErrEll	ErrEll	ErrEll
		4.12711	0.1024
		3.61925	0.1138
		4.58505	0.0989
		4.7619	0.0926
		4.28633	0.10011
		2.46002	0.1742
		6.19579	0.0847
		4.65116	0.1034
		5.07614	0.1002
		9.38086	0.0721
		6.48088	0.0907
		7.0373	0.1149
		8.1367	0.0976
		3.11526	0.0975
		3.61272	0.0997
		3.4965	0.0988
		3.32557	0.10045
		3.29489	0.09961
		3.47343	0.1015
		3.18471	0.10078
		3.75375	0.10474
		3.23102	0.10635
		2.88767	0.1214
		2.90698	0.1263
		7.83085	0.0697
		3.89105	0.133
		IsoLine	IsoLine
[truncated: 78 more columns]

## Sheet: PlotDat5
		3.1348	0.0948	1.6071	0.24	31.7347	0.0501079	3.52194	0.0948	2.89796	0.1148	6.58638	0.0864	8.92555	0.0721	8.05025	0.0712	6.77954	0.0808	7.98019	0.0744	7.44431	0.076	3.78366	0.173	7.97959	0.08	7.55702	0.111	5.21168	0.0966	10.9355	0.0727	4.75734	0.1028	5.56704	0.0933	10.8416	0.102	3.18215	0.1648	7.7237	0.0816	9.35276	0.083	8.71713	0.083	3.33589	0.1715
		2.82247	0.1148	1.62168	0.236498	15.6212	0.0547005	3.5145	0.0951343	2.89651	0.115039	6.57557	0.0883818	8.91014	0.0732222	8.04069	0.071773	6.77081	0.0816118	7.9695	0.0750447	7.43433	0.0763343	3.77234	0.17682	7.96351	0.0808357	7.5374	0.11482	5.20829	0.0973879	10.9127	0.0736789	4.75367	0.103182	5.56282	0.0936581	10.8112	0.105581	3.17889	0.16554	7.7171	0.0822685	9.33898	0.0843848	8.707	0.0841461	3.33055	0.172383
		6.0241	0.0864	1.68745	0.222656	10.2518	0.059901	3.49247	0.0954557	2.89221	0.115268	6.54358	0.0902874	8.86449	0.0743013	8.01239	0.0723241	6.74495	0.0823924	7.93785	0.0756646	7.40479	0.0766557	3.73884	0.180494	7.91589	0.0816392	7.47929	0.118494	5.19825	0.0981456	10.845	0.0746203	4.74279	0.103549	5.55033	0.0940025	10.7211	0.109025	3.16921	0.166252	7.69754	0.0829114	9.29817	0.0857165	8.677	0.0852481	3.31475	0.173233
		8.12348	0.0721	1.75767	0.209729	7.56836	0.0657994	3.4567	0.0957519	2.88524	0.11548	6.49162	0.0920436	8.79038	0.0752958	7.96642	0.0728319	6.70296	0.0831118	7.88644	0.0762359	7.35682	0.0769519	3.68443	0.183879	7.83857	0.0823798	7.38494	0.121879	5.18195	0.0988438	10.7351	0.0754878	4.72513	0.103888	5.53005	0.0943199	10.5749	0.112199	3.15349	0.166908	7.66579	0.0835039	9.2319	0.0869437	8.62829	0.0862637	3.28907	0.174016
		7.55287	0.0712	1.8328	0.197651	5.95934	0.0724996	3.40855	0.0960116	2.87585	0.115665	6.42169	0.0935829	8.69063	0.0761674	7.90457	0.073277	6.64644	0.0837424	7.81726	0.0767366	7.29227	0.0772116	3.61121	0.186847	7.73451	0.0830289	7.25795	0.124847	5.16001	0.0994559	10.5873	0.0762482	4.70136	0.104185	5.50276	0.0945981	10.3781	0.114981	3.13233	0.167483	7.62305	0.0840231	9.14271	0.0880194	8.56274	0.087154	3.25453	0.174702
		6.32511	0.0808	1.91338	0.186365	4.88752	0.0801223	3.34988	0.0962247	2.86441	0.115818	6.33648	0.0948462	8.56908	0.0768828	7.8292	0.0736423	6.57758	0.0842599	7.73296	0.0771476	7.2136	0.0774247	3.52199	0.189282	7.60772	0.0835616	7.10322	0.127282	5.13327	0.0999581	10.4071	0.0768722	4.6724	0.104428	5.46951	0.0948264	10.1383	0.117264	3.10655	0.167955	7.57098	0.0844493	9.03403	0.0889022	8.48286	0.0878845	3.21243	0.175265
		7.42391	0.0744	2	0.175816	4.12267	0.088807	3.28295	0.096383	2.85136	0.115931	6.23927	0.0957849	8.43042	0.0774143	7.74321	0.0739137	6.49901	0.0846444	7.63679	0.0774529	7.12386	0.077583	3.4202	0.191091	7.46306	0.0839575	6.92669	0.129091	5.10277	0.100331	10.2016	0.0773359	4.63935	0.104609	5.43157	0.0949961	9.86478	0.118961	3.07714	0.168305	7.51157	0.084766	8.91003	0.0895581	8.39173	0.0884274	3.16441	0.175684
		6.92521	0.076	2.09336	0.165954	3.54967	0.0987156	3.21032	0.0964805	2.83719	0.116	6.13379	0.096363	8.27995	0.0777417	7.6499	0.0740809	6.41377	0.0848812	7.53243	0.077641	7.02648	0.0776805	3.30975	0.192206	7.30609	0.0842012	6.73515	0.130206	5.06967	0.100561	9.97853	0.0776215	4.6035	0.104721	5.39041	0.0951005	9.56795	0.120005	3.04523	0.168521	7.44711	0.084961	8.77549	0.0899621	8.29284	0.0887617	3.1123	0.175941
		3.19489	0.173	2.19427	0.15673	3.10458	0.110036	3.1348	0.0965134	2.82247	0.116024	6.0241	0.0965581	8.12348	0.0778522	7.55287	0.0741373	6.32511	0.0849612	7.42391	0.0777045	6.92521	0.0777134	3.19489	0.192582	7.14286	0.0842836	6.53595	0.130582	5.03525	0.100639	9.74659	0.0777179	4.56621	0.104758	5.34759	0.0951358	9.25926	0.120358	3.01205	0.168594	7.38007	0.0850268	8.63558	0.0900985	8.19001	0.0888746	3.0581	0.176028
		7.14286	0.08	2.30366	0.148103	2.74902	0.122987	3.05927	0.0964805	2.80774	0.116	5.9144	0.096363	7.967	0.0777417	7.45584	0.0740809	6.23646	0.0848812	7.31538	0.077641	6.82394	0.0776805	3.08002	0.192206	6.97962	0.0842012	6.33675	0.130206	5.00083	0.100561	9.51464	0.0776215	4.52892	0.104721	5.30478	0.0951005	8.95057	0.120005	2.97886	0.168521	7.31304	0.084961	8.49566	0.0899621	8.08717	0.0887617	3.00391	0.175941
		6.53595	0.111	2.42264	0.140031	2.45857	0.137821	2.98664	0.096383	2.79358	0.115931	5.80892	0.0957849	7.81654	0.0774143	7.36253	0.0739137	6.15121	0.0846444	7.21102	0.0774529	6.72656	0.077583	2.96958	0.191091	6.82265	0.0839575	6.1452	0.129091	4.96773	0.100331	9.29161	0.0773359	4.49307	0.104609	5.26362	0.0949961	8.65374	0.118961	2.94695	0.168305	7.24857	0.084766	8.36112	0.0895581	7.98829	0.0884274	2.9518	0.175684
		5.03525	0.0966	2.55251	0.132475	2.21696	0.154833	2.91971	0.0962247	2.78053	0.115818	5.71171	0.0948462	7.67787	0.0768828	7.27654	0.0736423	6.07264	0.0842599	7.11485	0.0771476	6.63681	0.0774247	2.86779	0.189282	6.67799	0.0835616	5.96867	0.127282	4.93722	0.0999581	9.08607	0.0768722	4.46002	0.104428	5.22568	0.0948264	8.38018	0.117264	2.91754	0.167955	7.18917	0.0844493	8.23713	0.0889022	7.89716	0.0878845	2.90377	0.175265
		9.74659	0.0727	2.69483	0.125402	2.01291	0.174366	2.86104	0.0960116	2.76909	0.115665	5.6265	0.0935829	7.55633	0.0761674	7.20117	0.073277	6.00378	0.0837424	7.03055	0.0767366	6.55815	0.0772116	2.77857	0.186847	6.5512	0.0830289	5.81394	0.124847	4.91049	0.0994559	8.90591	0.0762482	4.43106	0.104185	5.19242	0.0945981	8.1404	0.114981	2.89177	0.167483	7.13709	0.0840231	8.12845	0.0880194	7.81728	0.087154	2.86168	0.174702
		4.56621	0.1028	2.85146	0.118779	1.83837	0.196819	2.81289	0.0957519	2.7597	0.11548	5.55658	0.0920436	7.45658	0.0752958	7.13932	0.0728319	5.94727	0.0831118	6.96137	0.0762359	6.49359	0.0769519	2.70534	0.183879	6.44714	0.0823798	5.68696	0.121879	4.88855	0.0988438	8.75805	0.0754878	4.40729	0.103888	5.16513	0.0943199	7.94362	0.112199	2.87061	0.166908	7.09436	0.0835039	8.03926	0.0869437	7.75173	0.0862637	2.82713	0.174016
		5.34759	0.0933	3.02463	0.112574	1.68745	0.222656	2.77712	0.0954557	2.75272	0.115268	5.50462	0.0902874	7.38246	0.0743013	7.09335	0.0723241	5.90527	0.0823924	6.90996	0.0756646	6.44562	0.0766557	2.65094	0.180494	6.36982	0.0816392	5.5926	0.118494	4.87224	0.0981456	8.64818	0.0746203	4.38963	0.103549	5.14486	0.0940025	7.7974	0.109025	2.85489	0.166252	7.0626	0.0829114	7.97299	0.0857165	7.70301	0.0852481	2.80146	0.173233
		9.25926	0.102	3.21711	0.10676	IsoLine	IsoLine	2.75509	0.0951343	2.74843	0.115039	5.47262	0.0883818	7.33682	0.0732222	7.06505	0.071773	5.87941	0.0816118	6.87831	0.0750447	6.41608	0.0763343	2.61743	0.17682	6.3222	0.0808357	5.5345	0.11482	4.8622	0.0973879	8.58053	0.0736789	4.37875	0.103182	5.13237	0.0936581	7.70736	0.105581	2.84521	0.16554	7.04305	0.0822685	7.93217	0.0843848	7.67302	0.0841461	2.78566	0.172383
		3.01205	0.1648	3.43229	0.101311			2.74765	0.0948	2.74697	0.1148	5.46181	0.0864	7.3214	0.0721	7.05549	0.0712	5.87068	0.0808	6.86762	0.0744	6.40611	0.076	2.60612	0.173	6.30613	0.08	5.51488	0.111	4.85881	0.0966	8.55768	0.0727	4.37508	0.1028	5.12815	0.0933	7.67695	0.102	2.84194	0.1648	7.03645	0.0816	7.91839	0.083	7.66289	0.083	2.78032	0.1715
		7.38007	0.0816	3.6744	0.0962022			2.75509	0.0944657	2.74843	0.114561	5.47262	0.0844182	7.33682	0.0709778	7.06505	0.070627	5.87941	0.0799882	6.87831	0.0737553	6.41608	0.0756657	2.61743	0.16918	6.3222	0.0791643	5.5345	0.10718	4.8622	0.0958121	8.58053	0.0717211	4.37875	0.102418	5.13237	0.0929419	7.70736	0.0984185	2.84521	0.16406	7.04305	0.0809315	7.93217	0.0816152	7.67302	0.0818539	2.78566	0.170617
		8.63558	0.083	3.9488	0.0914107			2.77712	0.0941443	2.75272	0.114332	5.50462	0.0825126	7.38246	0.0698987	7.09335	0.0700759	5.90527	0.0792076	6.90996	0.0731354	6.44562	0.0753443	2.65094	0.165506	6.36982	0.0783608	5.5926	0.103506	4.87224	0.0950544	8.64818	0.0707797	4.38963	0.102051	5.14486	0.0925975	7.7974	0.0949747	2.85489	0.163348	7.0626	0.0802886	7.97299	0.0802835	7.70301	0.0807519	2.80146	0.169767
		8.19001	0.083	4.26237	0.0869154			2.81289	0.0938481	2.7597	0.11412	5.55658	0.0807564	7.45658	0.0689042	7.13932	0.0695681	5.94727	0.0784882	6.96137	0.0725641	6.49359	0.0750481	2.70534	0.162121	6.44714	0.0776202	5.68696	0.100121	4.88855	0.0943562	8.75805	0.0699122	4.40729	0.101712	5.16513	0.0922801	7.94362	0.0918008	2.87061	0.162692	7.09436	0.0796961	8.03926	0.0790563	7.75173	0.0797363	2.82713	0.168984
		3.0581	0.1715	4.62412	0.0826968			2.86104	0.0935884	2.76909	0.113935	5.6265	0.0792171	7.55633	0.0680326	7.20117	0.069123	6.00378	0.0778576	7.03055	0.0720634	6.55815	0.0747884	2.77857	0.159153	6.5512	0.0769711	5.81394	0.0971535	4.91049	0.0937441	8.90591	0.0691518	4.43106	0.101415	5.19242	0.0920019	8.1404	0.0890189	2.89177	0.162117	7.13709	0.0791769	8.12845	0.0779806	7.81728	0.078846	2.86168	0.168298
		4.38596	0.1403	5.04601	0.0787364			2.91971	0.0933753	2.78053	0.113782	5.71171	0.0779538	7.67787	0.0673172	7.27654	0.0687577	6.07264	0.0773401	7.11485	0.0716524	6.63681	0.0745753	2.86779	0.156718	6.67799	0.0764384	5.96867	0.0947182	4.93722	0.0932419	9.08607	0.0685278	4.46002	0.101172	5.22568	0.0917736	8.38018	0.0867358	2.91754	0.161645	7.18917	0.0787507	8.23713	0.0770978	7.89716	0.0781155	2.90377	0.167735
		3.18471	0.1746	5.54433	0.0750173			2.98664	0.093217	2.79358	0.113669	5.80892	0.0770151	7.81654	0.0667857	7.36253	0.0684863	6.15121	0.0769556	7.21102	0.0713471	6.72656	0.074417	2.96958	0.154909	6.82265	0.0760425	6.1452	0.0929086	4.96773	0.0928687	9.29161	0.0680641	4.49307	0.100991	5.26362	0.0916039	8.65374	0.0850393	2.94695	0.161295	7.24857	0.078434	8.36112	0.0764419	7.98829	0.0775726	2.9518	0.167316
		3.14465	0.1803	6.14186	0.0715235			3.05927	0.0931195	2.80774	0.1136	5.9144	0.076437	7.967	0.0664583	7.45584	0.0683191	6.23646	0.0767188	7.31538	0.071159	6.82394	0.0743195	3.08002	0.153794	6.97962	0.0757988	6.33675	0.0917943	5.00083	0.0926388	9.51464	0.0677785	4.52892	0.100879	5.30478	0.0914995	8.95057	0.0839946	2.97886	0.161079	7.31304	0.078239	8.49566	0.0760379	8.08717	0.0772383	3.00391	0.167059
		7.68049	0.0841	6.8714	0.0682403			3.1348	0.0930866	2.82247	0.113576	6.0241	0.0762419	8.12348	0.0663478	7.55287	0.0682627	6.32511	0.0766388	7.42391	0.0710955	6.92521	0.0742866	3.19489	0.153418	7.14286	0.0757164	6.53595	0.091418	5.03525	0.0925612	9.74659	0.0676821	4.56621	0.100842	5.34759	0.0914642	9.25926	0.0836419	3.01205	0.161006	7.38007	0.0781732	8.63558	0.0759015	8.19001	0.0771254	3.0581	0.166972
		5.71429	0.1183	7.78202	0.0651539			3.21032	0.0931195	2.83719	0.1136	6.13379	0.076437	8.27995	0.0664583	7.6499	0.0683191	6.41377	0.0767188	7.53243	0.071159	7.02648	0.0743195	3.30975	0.153794	7.30609	0.0757988	6.73515	0.0917943	5.06967	0.0926388	9.97853	0.0677785	4.6035	0.100879	5.39041	0.0914995	9.56795	0.0839946	3.04523	0.161079	7.44711	0.078239	8.77549	0.0760379	8.29284	0.0772383	3.1123	0.167059
		9.46074	0.0768	8.95054	0.0622515			3.28295	0.093217	2.85136	0.113669	6.23927	0.0770151	8.43042	0.0667857	7.74321	0.0684863	6.49901	0.0769556	7.63679	0.0713471	7.12386	0.074417	3.4202	0.154909	7.46306	0.0760425	6.92669	0.0929086	5.10277	0.0928687	10.2016	0.0680641	4.63935	0.100991	5.43157	0.0916039	9.86478	0.0850393	3.07714	0.161295	7.51157	0.078434	8.91003	0.0764419	8.39173	0.0775726	3.16441	0.167316
		4.79846	0.178	10.5044	0.059521			3.34988	0.0933753	2.86441	0.113782	6.33648	0.0779538	8.56908	0.0673172	7.8292	0.0687577	6.57758	0.0773401	7.73296	0.0716524	7.2136	0.0745753	3.52199	0.156718	7.60772	0.0764384	7.10322	0.0947182	5.13327	0.0932419	10.4071	0.0685278	4.6724	0.101172	5.46951	0.0917736	10.1383	0.0867358	3.10655	0.161645	7.57098	0.0787507	9.03403	0.0770978	8.48286	0.0781155	3.21243	0.167735
		3.92157	0.1698	12.6715	0.0569515			3.40855	0.0935884	2.87585	0.113935	6.42169	0.0792171	8.69063	0.0680326	7.90457	0.069123	6.64644	0.0778576	7.81726	0.0720634	7.29227	0.0747884	3.61121	0.159153	7.73451	0.0769711	7.25795	0.0971535	5.16001	0.0937441	10.5873	0.0691518	4.70136	0.101415	5.50276	0.0920019	10.3781	0.0890189	3.13233	0.162117	7.62305	0.0791769	9.14271	0.0779806	8.56274	0.078846	3.25453	0.168298
		3.42818	0.1814	15.9039	0.0545325			3.4567	0.0938481	2.88524	0.11412	6.49162	0.0807564	8.79038	0.0689042	7.96642	0.0695681	6.70296	0.0784882	7.88644	0.0725641	7.35682	0.0750481	3.68443	0.162121	7.83857	0.0776202	7.38494	0.100121	5.18195	0.0943562	10.7351	0.0699122	4.72513	0.101712	5.53005	0.0922801	10.5749	0.0918008	3.15349	0.162692	7.66579	0.0796961	9.2319	0.0790563	8.62829	0.0797363	3.28907	0.168984
		8.10373	0.119	21.2417	0.0522543			3.49247	0.0941443	2.89221	0.114332	6.54358	0.0825126	8.86449	0.0698987	8.01239	0.0700759	6.74495	0.0792076	7.93785	0.0731354	7.40479	0.0753443	3.73884	0.165506	7.91589	0.0783608	7.47929	0.103506	5.19825	0.0950544	10.845	0.0707797	4.74279	0.102051	5.55033	0.0925975	10.7211	0.0949747	3.16921	0.163348	7.69754	0.0802886	9.29817	0.0802835	8.677	0.0807519	3.31475	0.169767
		3.81679	0.1853	31.7347	0.0501079			3.5145	0.0944657	2.89651	0.114561	6.57557	0.0844182	8.91014	0.0709778	8.04069	0.070627	6.77081	0.0799882	7.9695	0.0737553	7.43433	0.0756657	3.77234	0.16918	7.96351	0.0791643	7.5374	0.10718	5.20829	0.0958121	10.9127	0.0717211	4.75367	0.102418	5.56282	0.0929419	10.8112	0.0984185	3.17889	0.16406	7.7171	0.0809315	9.33898	0.0816152	8.707	0.0818539	3.33055	0.170617
		4.65116	0.1707	35	0.0498883			3.52194	0.0948	2.89796	0.1148	6.58638	0.0864	8.92555	0.0721	8.05025	0.0712	6.77954	0.0808	7.98019	0.0744	7.44431	0.076	3.78366	0.173	7.97959	0.08	7.55702	0.111	5.21168	0.0966	10.9355	0.0727	4.75734	0.1028	5.56704	0.0933	10.8416	0.102	3.18215	0.1648	7.7237	0.0816	9.35276	0.083	8.71713	0.083	3.33589	0.1715
		9.07441	0.1113	IsoLine	IsoLine			ErrEll	ErrEll	ErrEll	ErrEll	ErrEll	ErrEll	ErrEll	ErrEll	ErrEll	ErrEll
		9.6432	0.0839
		3.58423	0.2423
		6.84931	0.1138
		7.69231	0.1339
		4.99251	0.1641
		6.99301	0.166
		7.63359	0.1401
		8.62069	0.1146
		5.95238	0.21
		3.58423	0.088
		5.88582	0.0752
		6.66667	0.0649
		6.92042	0.0734
		7.29927	0.0778
		8.92857	0.06
		10	0.0623
		IsoLine	IsoLine
[truncated: 58 more columns]

## Sheet: PlotDat6
Source sheet	All U-Pb data	3.1348	0.0948	1.6071	0.24	31.7347	0.0501079	3.52194	0.0948	2.89796	0.1148	6.58638	0.0864	8.92555	0.0721	8.05025	0.0712	6.77954	0.0808	7.98019	0.0744	7.44431	0.076	3.78366	0.173	7.97959	0.08	7.55702	0.111	5.21168	0.0966	10.9355	0.0727	4.75734	0.1028	5.56704	0.0933	10.8416	0.102	3.18215	0.1648	7.7237	0.0816	9.35276	0.083	8.71713	0.083	3.33589	0.1715
Plot name	Concordia6	2.82247	0.1148	1.62168	0.236498	15.6212	0.0547005	3.5145	0.0951343	2.89651	0.115039	6.57557	0.0883818	8.91014	0.0732222	8.04069	0.071773	6.77081	0.0816118	7.9695	0.0750447	7.43433	0.0763343	3.77234	0.17682	7.96351	0.0808357	7.5374	0.11482	5.20829	0.0973879	10.9127	0.0736789	4.75367	0.103182	5.56282	0.0936581	10.8112	0.105581	3.17889	0.16554	7.7171	0.0822685	9.33898	0.0843848	8.707	0.0841461	3.33055	0.172383
Plot Type	1	6.0241	0.0864	1.68745	0.222656	10.2518	0.059901	3.49247	0.0954557	2.89221	0.115268	6.54358	0.0902874	8.86449	0.0743013	8.01239	0.0723241	6.74495	0.0823924	7.93785	0.0756646	7.40479	0.0766557	3.73884	0.180494	7.91589	0.0816392	7.47929	0.118494	5.19825	0.0981456	10.845	0.0746203	4.74279	0.103549	5.55033	0.0940025	10.7211	0.109025	3.16921	0.166252	7.69754	0.0829114	9.29817	0.0857165	8.677	0.0852481	3.31475	0.173233
1st free col	109	8.12348	0.0721	1.75767	0.209729	7.56836	0.0657994	3.4567	0.0957519	2.88524	0.11548	6.49162	0.0920436	8.79038	0.0752958	7.96642	0.0728319	6.70296	0.0831118	7.88644	0.0762359	7.35682	0.0769519	3.68443	0.183879	7.83857	0.0823798	7.38494	0.121879	5.18195	0.0988438	10.7351	0.0754878	4.72513	0.103888	5.53005	0.0943199	10.5749	0.112199	3.15349	0.166908	7.66579	0.0835039	9.2319	0.0869437	8.62829	0.0862637	3.28907	0.174016
Sigma Level	2	7.55287	0.0712	1.8328	0.197651	5.95934	0.0724996	3.40855	0.0960116	2.87585	0.115665	6.42169	0.0935829	8.69063	0.0761674	7.90457	0.073277	6.64644	0.0837424	7.81726	0.0767366	7.29227	0.0772116	3.61121	0.186847	7.73451	0.0830289	7.25795	0.124847	5.16001	0.0994559	10.5873	0.0762482	4.70136	0.104185	5.50276	0.0945981	10.3781	0.114981	3.13233	0.167483	7.62305	0.0840231	9.14271	0.0880194	8.56274	0.087154	3.25453	0.174702
Absolute Errs	TRUE	6.32511	0.0808	1.91338	0.186365	4.88752	0.0801223	3.34988	0.0962247	2.86441	0.115818	6.33648	0.0948462	8.56908	0.0768828	7.8292	0.0736423	6.57758	0.0842599	7.73296	0.0771476	7.2136	0.0774247	3.52199	0.189282	7.60772	0.0835616	7.10322	0.127282	5.13327	0.0999581	10.4071	0.0768722	4.6724	0.104428	5.46951	0.0948264	10.1383	0.117264	3.10655	0.167955	7.57098	0.0844493	9.03403	0.0889022	8.48286	0.0878845	3.21243	0.175265
Symbol Type	1	7.42391	0.0744	2	0.175816	4.12267	0.088807	3.28295	0.096383	2.85136	0.115931	6.23927	0.0957849	8.43042	0.0774143	7.74321	0.0739137	6.49901	0.0846444	7.63679	0.0774529	7.12386	0.077583	3.4202	0.191091	7.46306	0.0839575	6.92669	0.129091	5.10277	0.100331	10.2016	0.0773359	4.63935	0.104609	5.43157	0.0949961	9.86478	0.118961	3.07714	0.168305	7.51157	0.084766	8.91003	0.0895581	8.39173	0.0884274	3.16441	0.175684
Inverse Plot	TRUE	6.92521	0.076	2.09336	0.165954	3.54967	0.0987156	3.21032	0.0964805	2.83719	0.116	6.13379	0.096363	8.27995	0.0777417	7.6499	0.0740809	6.41377	0.0848812	7.53243	0.077641	7.02648	0.0776805	3.30975	0.192206	7.30609	0.0842012	6.73515	0.130206	5.06967	0.100561	9.97853	0.0776215	4.6035	0.104721	5.39041	0.0951005	9.56795	0.120005	3.04523	0.168521	7.44711	0.084961	8.77549	0.0899621	8.29284	0.0887617	3.1123	0.175941
Color Plot	TRUE	3.19489	0.173	2.19427	0.15673	3.10458	0.110036	3.1348	0.0965134	2.82247	0.116024	6.0241	0.0965581	8.12348	0.0778522	7.55287	0.0741373	6.32511	0.0849612	7.42391	0.0777045	6.92521	0.0777134	3.19489	0.192582	7.14286	0.0842836	6.53595	0.130582	5.03525	0.100639	9.74659	0.0777179	4.56621	0.104758	5.34759	0.0951358	9.25926	0.120358	3.01205	0.168594	7.38007	0.0850268	8.63558	0.0900985	8.19001	0.0888746	3.0581	0.176028
3D plot	FALSE	7.14286	0.08	2.30366	0.148103	2.74902	0.122987	3.05927	0.0964805	2.80774	0.116	5.9144	0.096363	7.967	0.0777417	7.45584	0.0740809	6.23646	0.0848812	7.31538	0.077641	6.82394	0.0776805	3.08002	0.192206	6.97962	0.0842012	6.33675	0.130206	5.00083	0.100561	9.51464	0.0776215	4.52892	0.104721	5.30478	0.0951005	8.95057	0.120005	2.97886	0.168521	7.31304	0.084961	8.49566	0.0899621	8.08717	0.0887617	3.00391	0.175941
Linear	FALSE	6.53595	0.111	2.42264	0.140031	2.45857	0.137821	2.98664	0.096383	2.79358	0.115931	5.80892	0.0957849	7.81654	0.0774143	7.36253	0.0739137	6.15121	0.0846444	7.21102	0.0774529	6.72656	0.077583	2.96958	0.191091	6.82265	0.0839575	6.1452	0.129091	4.96773	0.100331	9.29161	0.0773359	4.49307	0.104609	5.26362	0.0949961	8.65374	0.118961	2.94695	0.168305	7.24857	0.084766	8.36112	0.0895581	7.98829	0.0884274	2.9518	0.175684
Data Range	C121:F170	5.03525	0.0966	2.55251	0.132475	2.21696	0.154833	2.91971	0.0962247	2.78053	0.115818	5.71171	0.0948462	7.67787	0.0768828	7.27654	0.0736423	6.07264	0.0842599	7.11485	0.0771476	6.63681	0.0774247	2.86779	0.189282	6.67799	0.0835616	5.96867	0.127282	4.93722	0.0999581	9.08607	0.0768722	4.46002	0.104428	5.22568	0.0948264	8.38018	0.117264	2.91754	0.167955	7.18917	0.0844493	8.23713	0.0889022	7.89716	0.0878845	2.90377	0.175265
Filled Symbols	TRUE	9.74659	0.0727	2.69483	0.125402	2.01291	0.174366	2.86104	0.0960116	2.76909	0.115665	5.6265	0.0935829	7.55633	0.0761674	7.20117	0.073277	6.00378	0.0837424	7.03055	0.0767366	6.55815	0.0772116	2.77857	0.186847	6.5512	0.0830289	5.81394	0.124847	4.91049	0.0994559	8.90591	0.0762482	4.43106	0.104185	5.19242	0.0945981	8.1404	0.114981	2.89177	0.167483	7.13709	0.0840231	8.12845	0.0880194	7.81728	0.087154	2.86168	0.174702
ConcAge	FALSE	4.56621	0.1028	2.85146	0.118779	1.83837	0.196819	2.81289	0.0957519	2.7597	0.11548	5.55658	0.0920436	7.45658	0.0752958	7.13932	0.0728319	5.94727	0.0831118	6.96137	0.0762359	6.49359	0.0769519	2.70534	0.183879	6.44714	0.0823798	5.68696	0.121879	4.88855	0.0988438	8.75805	0.0754878	4.40729	0.103888	5.16513	0.0943199	7.94362	0.112199	2.87061	0.166908	7.09436	0.0835039	8.03926	0.0869437	7.75173	0.0862637	2.82713	0.174016
ConcSwap	FALSE	5.34759	0.0933	3.02463	0.112574	1.68745	0.222656	2.77712	0.0954557	2.75272	0.115268	5.50462	0.0902874	7.38246	0.0743013	7.09335	0.0723241	5.90527	0.0823924	6.90996	0.0756646	6.44562	0.0766557	2.65094	0.180494	6.36982	0.0816392	5.5926	0.118494	4.87224	0.0981456	8.64818	0.0746203	4.38963	0.103549	5.14486	0.0940025	7.7974	0.109025	2.85489	0.166252	7.0626	0.0829114	7.97299	0.0857165	7.70301	0.0852481	2.80146	0.173233
1st Symbol-row	1	9.25926	0.102	3.21711	0.10676	IsoLine	IsoLine	2.75509	0.0951343	2.74843	0.115039	5.47262	0.0883818	7.33682	0.0732222	7.06505	0.071773	5.87941	0.0816118	6.87831	0.0750447	6.41608	0.0763343	2.61743	0.17682	6.3222	0.0808357	5.5345	0.11482	4.8622	0.0973879	8.58053	0.0736789	4.37875	0.103182	5.13237	0.0936581	7.70736	0.105581	2.84521	0.16554	7.04305	0.0822685	7.93217	0.0843848	7.67302	0.0841461	2.78566	0.172383
		3.01205	0.1648	3.43229	0.101311			2.74765	0.0948	2.74697	0.1148	5.46181	0.0864	7.3214	0.0721	7.05549	0.0712	5.87068	0.0808	6.86762	0.0744	6.40611	0.076	2.60612	0.173	6.30613	0.08	5.51488	0.111	4.85881	0.0966	8.55768	0.0727	4.37508	0.1028	5.12815	0.0933	7.67695	0.102	2.84194	0.1648	7.03645	0.0816	7.91839	0.083	7.66289	0.083	2.78032	0.1715
		7.38007	0.0816	3.6744	0.0962022			2.75509	0.0944657	2.74843	0.114561	5.47262	0.0844182	7.33682	0.0709778	7.06505	0.070627	5.87941	0.0799882	6.87831	0.0737553	6.41608	0.0756657	2.61743	0.16918	6.3222	0.0791643	5.5345	0.10718	4.8622	0.0958121	8.58053	0.0717211	4.37875	0.102418	5.13237	0.0929419	7.70736	0.0984185	2.84521	0.16406	7.04305	0.0809315	7.93217	0.0816152	7.67302	0.0818539	2.78566	0.170617
		8.63558	0.083	3.9488	0.0914107			2.77712	0.0941443	2.75272	0.114332	5.50462	0.0825126	7.38246	0.0698987	7.09335	0.0700759	5.90527	0.0792076	6.90996	0.0731354	6.44562	0.0753443	2.65094	0.165506	6.36982	0.0783608	5.5926	0.103506	4.87224	0.0950544	8.64818	0.0707797	4.38963	0.102051	5.14486	0.0925975	7.7974	0.0949747	2.85489	0.163348	7.0626	0.0802886	7.97299	0.0802835	7.70301	0.0807519	2.80146	0.169767
		8.19001	0.083	4.26237	0.0869154			2.81289	0.0938481	2.7597	0.11412	5.55658	0.0807564	7.45658	0.0689042	7.13932	0.0695681	5.94727	0.0784882	6.96137	0.0725641	6.49359	0.0750481	2.70534	0.162121	6.44714	0.0776202	5.68696	0.100121	4.88855	0.0943562	8.75805	0.0699122	4.40729	0.101712	5.16513	0.0922801	7.94362	0.0918008	2.87061	0.162692	7.09436	0.0796961	8.03926	0.0790563	7.75173	0.0797363	2.82713	0.168984
		3.0581	0.1715	4.62412	0.0826968			2.86104	0.0935884	2.76909	0.113935	5.6265	0.0792171	7.55633	0.0680326	7.20117	0.069123	6.00378	0.0778576	7.03055	0.0720634	6.55815	0.0747884	2.77857	0.159153	6.5512	0.0769711	5.81394	0.0971535	4.91049	0.0937441	8.90591	0.0691518	4.43106	0.101415	5.19242	0.0920019	8.1404	0.0890189	2.89177	0.162117	7.13709	0.0791769	8.12845	0.0779806	7.81728	0.078846	2.86168	0.168298
		4.38596	0.1403	5.04601	0.0787364			2.91971	0.0933753	2.78053	0.113782	5.71171	0.0779538	7.67787	0.0673172	7.27654	0.0687577	6.07264	0.0773401	7.11485	0.0716524	6.63681	0.0745753	2.86779	0.156718	6.67799	0.0764384	5.96867	0.0947182	4.93722	0.0932419	9.08607	0.0685278	4.46002	0.101172	5.22568	0.0917736	8.38018	0.0867358	2.91754	0.161645	7.18917	0.0787507	8.23713	0.0770978	7.89716	0.0781155	2.90377	0.167735
		3.18471	0.1746	5.54433	0.0750173			2.98664	0.093217	2.79358	0.113669	5.80892	0.0770151	7.81654	0.0667857	7.36253	0.0684863	6.15121	0.0769556	7.21102	0.0713471	6.72656	0.074417	2.96958	0.154909	6.82265	0.0760425	6.1452	0.0929086	4.96773	0.0928687	9.29161	0.0680641	4.49307	0.100991	5.26362	0.0916039	8.65374	0.0850393	2.94695	0.161295	7.24857	0.078434	8.36112	0.0764419	7.98829	0.0775726	2.9518	0.167316
		3.14465	0.1803	6.14186	0.0715235			3.05927	0.0931195	2.80774	0.1136	5.9144	0.076437	7.967	0.0664583	7.45584	0.0683191	6.23646	0.0767188	7.31538	0.071159	6.82394	0.0743195	3.08002	0.153794	6.97962	0.0757988	6.33675	0.0917943	5.00083	0.0926388	9.51464	0.0677785	4.52892	0.100879	5.30478	0.0914995	8.95057	0.0839946	2.97886	0.161079	7.31304	0.078239	8.49566	0.0760379	8.08717	0.0772383	3.00391	0.167059
		7.68049	0.0841	6.8714	0.0682403			3.1348	0.0930866	2.82247	0.113576	6.0241	0.0762419	8.12348	0.0663478	7.55287	0.0682627	6.32511	0.0766388	7.42391	0.0710955	6.92521	0.0742866	3.19489	0.153418	7.14286	0.0757164	6.53595	0.091418	5.03525	0.0925612	9.74659	0.0676821	4.56621	0.100842	5.34759	0.0914642	9.25926	0.0836419	3.01205	0.161006	7.38007	0.0781732	8.63558	0.0759015	8.19001	0.0771254	3.0581	0.166972
		5.71429	0.1183	7.78202	0.0651539			3.21032	0.0931195	2.83719	0.1136	6.13379	0.076437	8.27995	0.0664583	7.6499	0.0683191	6.41377	0.0767188	7.53243	0.071159	7.02648	0.0743195	3.30975	0.153794	7.30609	0.0757988	6.73515	0.0917943	5.06967	0.0926388	9.97853	0.0677785	4.6035	0.100879	5.39041	0.0914995	9.56795	0.0839946	3.04523	0.161079	7.44711	0.078239	8.77549	0.0760379	8.29284	0.0772383	3.1123	0.167059
		9.46074	0.0768	8.95054	0.0622515			3.28295	0.093217	2.85136	0.113669	6.23927	0.0770151	8.43042	0.0667857	7.74321	0.0684863	6.49901	0.0769556	7.63679	0.0713471	7.12386	0.074417	3.4202	0.154909	7.46306	0.0760425	6.92669	0.0929086	5.10277	0.0928687	10.2016	0.0680641	4.63935	0.100991	5.43157	0.0916039	9.86478	0.0850393	3.07714	0.161295	7.51157	0.078434	8.91003	0.0764419	8.39173	0.0775726	3.16441	0.167316
		4.79846	0.178	10.5044	0.059521			3.34988	0.0933753	2.86441	0.113782	6.33648	0.0779538	8.56908	0.0673172	7.8292	0.0687577	6.57758	0.0773401	7.73296	0.0716524	7.2136	0.0745753	3.52199	0.156718	7.60772	0.0764384	7.10322	0.0947182	5.13327	0.0932419	10.4071	0.0685278	4.6724	0.101172	5.46951	0.0917736	10.1383	0.0867358	3.10655	0.161645	7.57098	0.0787507	9.03403	0.0770978	8.48286	0.0781155	3.21243	0.167735
		3.92157	0.1698	12.6715	0.0569515			3.40855	0.0935884	2.87585	0.113935	6.42169	0.0792171	8.69063	0.0680326	7.90457	0.069123	6.64644	0.0778576	7.81726	0.0720634	7.29227	0.0747884	3.61121	0.159153	7.73451	0.0769711	7.25795	0.0971535	5.16001	0.0937441	10.5873	0.0691518	4.70136	0.101415	5.50276	0.0920019	10.3781	0.0890189	3.13233	0.162117	7.62305	0.0791769	9.14271	0.0779806	8.56274	0.078846	3.25453	0.168298
		3.42818	0.1814	15.9039	0.0545325			3.4567	0.0938481	2.88524	0.11412	6.49162	0.0807564	8.79038	0.0689042	7.96642	0.0695681	6.70296	0.0784882	7.88644	0.0725641	7.35682	0.0750481	3.68443	0.162121	7.83857	0.0776202	7.38494	0.100121	5.18195	0.0943562	10.7351	0.0699122	4.72513	0.101712	5.53005	0.0922801	10.5749	0.0918008	3.15349	0.162692	7.66579	0.0796961	9.2319	0.0790563	8.62829	0.0797363	3.28907	0.168984
		8.10373	0.119	21.2417	0.0522543			3.49247	0.0941443	2.89221	0.114332	6.54358	0.0825126	8.86449	0.0698987	8.01239	0.0700759	6.74495	0.0792076	7.93785	0.0731354	7.40479	0.0753443	3.73884	0.165506	7.91589	0.0783608	7.47929	0.103506	5.19825	0.0950544	10.845	0.0707797	4.74279	0.102051	5.55033	0.0925975	10.7211	0.0949747	3.16921	0.163348	7.69754	0.0802886	9.29817	0.0802835	8.677	0.0807519	3.31475	0.169767
		3.81679	0.1853	31.7347	0.0501079			3.5145	0.0944657	2.89651	0.114561	6.57557	0.0844182	8.91014	0.0709778	8.04069	0.070627	6.77081	0.0799882	7.9695	0.0737553	7.43433	0.0756657	3.77234	0.16918	7.96351	0.0791643	7.5374	0.10718	5.20829	0.0958121	10.9127	0.0717211	4.75367	0.102418	5.56282	0.0929419	10.8112	0.0984185	3.17889	0.16406	7.7171	0.0809315	9.33898	0.0816152	8.707	0.0818539	3.33055	0.170617
		4.65116	0.1707	35	0.0498883			3.52194	0.0948	2.89796	0.1148	6.58638	0.0864	8.92555	0.0721	8.05025	0.0712	6.77954	0.0808	7.98019	0.0744	7.44431	0.076	3.78366	0.173	7.97959	0.08	7.55702	0.111	5.21168	0.0966	10.9355	0.0727	4.75734	0.1028	5.56704	0.0933	10.8416	0.102	3.18215	0.1648	7.7237	0.0816	9.35276	0.083	8.71713	0.083	3.33589	0.1715
		9.07441	0.1113	IsoLine	IsoLine			ErrEll	ErrEll	ErrEll	ErrEll	ErrEll	ErrEll	ErrEll	ErrEll	ErrEll	ErrEll	ErrEll	ErrEll	ErrEll	ErrEll	ErrEll	ErrEll	ErrEll	ErrEll	ErrEll	ErrEll	ErrEll	ErrEll	ErrEll	ErrEll	ErrEll	ErrEll	ErrEll	ErrEll	ErrEll	ErrEll	ErrEll	ErrEll	ErrEll	ErrEll	ErrEll	ErrEll	ErrEll	ErrEll	ErrEll	ErrEll	ErrEll	ErrEll
		9.6432	0.0839
		3.58423	0.2423
		6.84931	0.1138
		7.69231	0.1339
		4.99251	0.1641
		6.99301	0.166
		7.63359	0.1401
		8.62069	0.1146
		5.95238	0.21
		3.58423	0.088
		5.88582	0.0752
		6.66667	0.0649
		6.92042	0.0734
		7.29927	0.0778
		8.92857	0.06
		10	0.0623
		IsoLine	IsoLine
[truncated: 58 more columns]

## Sheet: PlotDat7
		4.31034	0.07448	1.6071	0.24	31.7347	0.0501079	4.56047	0.07448	4.50417	0.07781	5.79925	0.0755	5.55102	0.0757	5.77307	0.0794	5.70154	0.0778	5.33391	0.078	5.26339	0.0753	5.22349	0.079	5.45309	0.0794	5.22604	0.0827	4.99911	0.0797	4.98341	0.0824	4.99979	0.0839	4.87953	0.08404	4.79583	0.0856	4.63369	0.085	4.44336	0.0863	4.3563	0.0853	4.34274	0.0878	4.28369	0.0868
		4.20168	0.07781	1.62168	0.236498	15.6212	0.0547005	4.55566	0.0746495	4.49836	0.0779676	5.79625	0.0762402	5.54833	0.0763447	5.76859	0.0798775	5.69653	0.0780626	5.33191	0.078382	5.26079	0.0758492	5.22145	0.0793104	5.44802	0.0798059	5.22296	0.0833447	4.99692	0.0801775	4.98035	0.0832357	4.9965	0.084282	4.87684	0.084231	4.79377	0.0858865	4.63176	0.0854775	4.4412	0.0865626	4.35446	0.0857537	4.34095	0.0882537	4.28117	0.0871581
		5.64334	0.0755	1.68745	0.222656	10.2518	0.059901	4.54143	0.0748125	4.48115	0.0781191	5.78738	0.0769519	5.54038	0.0769646	5.75534	0.0803367	5.68168	0.0783152	5.32601	0.0787494	5.2531	0.0763772	5.21543	0.0796089	5.43301	0.0801962	5.21384	0.0839646	4.99044	0.0806367	4.97127	0.0840392	4.98676	0.0846494	4.86886	0.0844147	4.78764	0.086162	4.62603	0.0859367	4.4348	0.0868152	4.34902	0.0861899	4.33567	0.0886899	4.27373	0.0875025
		5.41125	0.0757	1.75767	0.209729	7.56836	0.0657994	4.51831	0.0749628	4.45319	0.0782588	5.77297	0.0776078	5.52747	0.0775359	5.73382	0.0807599	5.65758	0.0785479	5.31642	0.0790879	5.2406	0.0768639	5.20566	0.0798839	5.40865	0.0805559	5.19904	0.0845359	4.97991	0.0810599	4.95654	0.0847798	4.97094	0.0849879	4.85591	0.084584	4.7777	0.0864159	4.61674	0.0863599	4.4244	0.0870479	4.3402	0.0865919	4.32709	0.0890919	4.26163	0.0878199
		5.54017	0.0794	1.8328	0.197651	5.95934	0.0724996	4.48721	0.0750944	4.41557	0.0783812	5.75358	0.0781828	5.51008	0.0780366	5.70485	0.0811308	5.62514	0.078752	5.30351	0.0793847	5.22379	0.0772904	5.1925	0.080125	5.37586	0.0808712	5.17912	0.0850366	4.96575	0.0814308	4.9367	0.0854289	4.94965	0.0852847	4.83847	0.0847323	4.76432	0.0866385	4.60422	0.0867308	4.41042	0.087252	4.32831	0.0869443	4.31554	0.0894443	4.24536	0.0880981
		5.4407	0.0778	1.91338	0.186365	4.88752	0.0801223	4.44931	0.0752025	4.36974	0.0784816	5.72996	0.0786546	5.4889	0.0784476	5.66956	0.0814352	5.58561	0.0789194	5.28778	0.0796282	5.20331	0.0776405	5.17647	0.0803229	5.3359	0.0811299	5.15485	0.0854476	4.94848	0.0817352	4.91253	0.0859616	4.9237	0.0855282	4.81723	0.0848541	4.74801	0.0868211	4.58898	0.0870352	4.39337	0.0874194	4.31384	0.0872335	4.30147	0.0897335	4.22553	0.0883264
		5.23013	0.078	2	0.175816	4.12267	0.088807	4.40606	0.0752828	4.31744	0.0785563	5.703	0.0790052	5.46474	0.0787529	5.62929	0.0816614	5.54052	0.0790438	5.26984	0.0798091	5.17994	0.0779006	5.15819	0.0804699	5.29032	0.0813222	5.12715	0.0857529	4.92879	0.0819614	4.88496	0.0863575	4.8941	0.0857091	4.79299	0.0849446	4.72941	0.0869569	4.57159	0.0872614	4.37392	0.0875438	4.29732	0.0874484	4.28542	0.0899484	4.2029	0.0884961
		5.12821	0.0753	2.09336	0.165954	3.54967	0.0987156	4.35914	0.0753323	4.26069	0.0786022	5.67376	0.0792211	5.43852	0.078941	5.5856	0.0818007	5.49158	0.0791204	5.25037	0.0799206	5.15458	0.0780608	5.13834	0.0805605	5.24085	0.0814406	5.09711	0.085941	4.90742	0.0821007	4.85504	0.0866012	4.86199	0.0858206	4.76669	0.0850003	4.70922	0.0870404	4.55272	0.0874007	4.35282	0.0876204	4.2794	0.0875807	4.26801	0.0900807	4.17835	0.0886005
		5.11771	0.079	2.19427	0.15673	3.10458	0.110036	4.31034	0.075349	4.20168	0.0786178	5.64334	0.079294	5.41125	0.0790045	5.54017	0.0818477	5.4407	0.0791463	5.23013	0.0799582	5.12821	0.0781149	5.11771	0.080591	5.18941	0.0814806	5.06586	0.0860045	4.8852	0.0821477	4.82393	0.0866836	4.82859	0.0858582	4.73934	0.0850191	4.68823	0.0870686	4.53309	0.0874477	4.33088	0.0876463	4.26076	0.0876254	4.24989	0.0901254	4.15282	0.0886358
		5.18941	0.0794	2.30366	0.148103	2.74902	0.122987	4.26155	0.0753323	4.14267	0.0786022	5.61292	0.0792211	5.38399	0.078941	5.49473	0.0818007	5.38981	0.0791204	5.20988	0.0799206	5.10183	0.0780608	5.09707	0.0805605	5.13797	0.0814406	5.03461	0.085941	4.86298	0.0821007	4.79281	0.0866012	4.79518	0.0858206	4.71198	0.0850003	4.66724	0.0870404	4.51347	0.0874007	4.30893	0.0876204	4.24212	0.0875807	4.23178	0.0900807	4.12729	0.0886005
		5.06586	0.0827	2.42264	0.140031	2.45857	0.137821	4.21463	0.0752828	4.08592	0.0785563	5.58368	0.0790052	5.35777	0.0787529	5.45104	0.0816614	5.34088	0.0790438	5.19041	0.0798091	5.07647	0.0779006	5.07723	0.0804699	5.08851	0.0813222	5.00456	0.0857529	4.84161	0.0819614	4.76289	0.0863575	4.76307	0.0857091	4.68568	0.0849446	4.64706	0.0869569	4.4946	0.0872614	4.28783	0.0875438	4.2242	0.0874484	4.21437	0.0899484	4.10275	0.0884961
		4.8852	0.0797	2.55251	0.132475	2.21696	0.154833	4.17138	0.0752025	4.03363	0.0784816	5.55672	0.0786546	5.33361	0.0784476	5.41077	0.0814352	5.29578	0.0789194	5.17247	0.0796282	5.0531	0.0776405	5.05894	0.0803229	5.04293	0.0811299	4.97686	0.0854476	4.82191	0.0817352	4.73532	0.0859616	4.73347	0.0855282	4.66145	0.0848541	4.62845	0.0868211	4.4772	0.0870352	4.26839	0.0874194	4.20768	0.0872335	4.19831	0.0897335	4.08012	0.0883264
		4.82393	0.0824	2.69483	0.125402	2.01291	0.174366	4.13348	0.0750944	3.98779	0.0783812	5.5331	0.0781828	5.31243	0.0780366	5.37548	0.0811308	5.25625	0.078752	5.15674	0.0793847	5.03262	0.0772904	5.04291	0.080125	5.00297	0.0808712	4.95259	0.0850366	4.80465	0.0814308	4.71115	0.0854289	4.70752	0.0852847	4.6402	0.0847323	4.61215	0.0866385	4.46196	0.0867308	4.25134	0.087252	4.1932	0.0869443	4.18425	0.0894443	4.06029	0.0880981
		4.82859	0.0839	2.85146	0.118779	1.83837	0.196819	4.10238	0.0749628	3.95017	0.0782588	5.51371	0.0776078	5.29504	0.0775359	5.34651	0.0807599	5.22381	0.0785479	5.14383	0.0790879	5.01581	0.0768639	5.02975	0.0798839	4.97018	0.0805559	4.93267	0.0845359	4.79048	0.0810599	4.69132	0.0847798	4.68623	0.0849879	4.62277	0.084584	4.59877	0.0864159	4.44945	0.0863599	4.23735	0.0870479	4.18132	0.0865919	4.1727	0.0890919	4.04402	0.0878199
		4.73934	0.08404	3.02463	0.112574	1.68745	0.222656	4.07926	0.0748125	3.92222	0.0781191	5.4993	0.0769519	5.28213	0.0769646	5.32499	0.0803367	5.19971	0.0783152	5.13424	0.0787494	5.00331	0.0763772	5.01998	0.0796089	4.94581	0.0801962	4.91787	0.0839646	4.77996	0.0806367	4.67658	0.0840392	4.67041	0.0846494	4.60981	0.0844147	4.58882	0.086162	4.44015	0.0859367	4.22696	0.0868152	4.17249	0.0861899	4.16412	0.0886899	4.03192	0.0875025
		4.68823	0.0856	3.21711	0.10676	IsoLine	IsoLine	4.06503	0.0746495	3.905	0.0779676	5.49043	0.0762402	5.27418	0.0763447	5.31174	0.0798775	5.18487	0.0780626	5.12834	0.078382	4.99562	0.0758492	5.01396	0.0793104	4.93081	0.0798059	4.90875	0.0833447	4.77348	0.0801775	4.6675	0.0832357	4.66067	0.084282	4.60183	0.084231	4.5827	0.0858865	4.43443	0.0854775	4.22056	0.0865626	4.16706	0.0857537	4.15884	0.0882537	4.02448	0.0871581
		4.53309	0.085	3.43229	0.101311			4.06022	0.07448	3.89919	0.07781	5.48743	0.0755	5.27149	0.0757	5.30726	0.0794	5.17985	0.0778	5.12634	0.078	4.99302	0.0753	5.01193	0.079	4.92574	0.0794	4.90567	0.0827	4.77129	0.0797	4.66444	0.0824	4.65738	0.0839	4.59914	0.08404	4.58063	0.0856	4.43249	0.085	4.2184	0.0863	4.16522	0.0853	4.15705	0.0878	4.02196	0.0868
		4.33088	0.0863	3.6744	0.0962022			4.06503	0.0743105	3.905	0.0776524	5.49043	0.0747598	5.27418	0.0750553	5.31174	0.0789225	5.18487	0.0775374	5.12834	0.077618	4.99562	0.0747508	5.01396	0.0786896	4.93081	0.0789941	4.90875	0.0820553	4.77348	0.0792225	4.6675	0.0815643	4.66067	0.083518	4.60183	0.083849	4.5827	0.0853135	4.43443	0.0845225	4.22056	0.0860374	4.16706	0.0848463	4.15884	0.0873463	4.02448	0.0864419
		4.26076	0.0853	3.9488	0.0914107			4.07926	0.0741475	3.92222	0.0775009	5.4993	0.0740481	5.28213	0.0744354	5.32499	0.0784633	5.19971	0.0772848	5.13424	0.0772506	5.00331	0.0742228	5.01998	0.0783911	4.94581	0.0786038	4.91787	0.0814354	4.77996	0.0787633	4.67658	0.0807608	4.67041	0.0831506	4.60981	0.0836653	4.58882	0.085038	4.44015	0.0840633	4.22696	0.0857848	4.17249	0.0844101	4.16412	0.0869101	4.03192	0.0860975
		4.24989	0.0878	4.26237	0.0869154			4.10238	0.0739972	3.95017	0.0773612	5.51371	0.0733922	5.29504	0.0738641	5.34651	0.0780401	5.22381	0.0770521	5.14383	0.0769121	5.01581	0.0737361	5.02975	0.0781161	4.97018	0.0782441	4.93267	0.0808641	4.79048	0.0783401	4.69132	0.0800202	4.68623	0.0828121	4.62277	0.083496	4.59877	0.0847841	4.44945	0.0836401	4.23735	0.0855521	4.18132	0.0840081	4.1727	0.0865081	4.04402	0.0857801
		4.15282	0.0868	4.62412	0.0826968			4.13348	0.0738656	3.98779	0.0772388	5.5331	0.0728172	5.31243	0.0733634	5.37548	0.0776692	5.25625	0.076848	5.15674	0.0766153	5.03262	0.0733096	5.04291	0.077875	5.00297	0.0779288	4.95259	0.0803634	4.80465	0.0779692	4.71115	0.0793711	4.70752	0.0825153	4.6402	0.0833477	4.61215	0.0845615	4.46196	0.0832692	4.25134	0.085348	4.1932	0.0836557	4.18425	0.0861557	4.06029	0.0855019
		4.26803	0.0922	5.04601	0.0787364			4.17138	0.0737575	4.03363	0.0771384	5.55672	0.0723454	5.33361	0.0729524	5.41077	0.0773648	5.29578	0.0766806	5.17247	0.0763718	5.0531	0.0729595	5.05894	0.0776771	5.04293	0.0776701	4.97686	0.0799524	4.82191	0.0776648	4.73532	0.0788384	4.73347	0.0822718	4.66145	0.0832259	4.62845	0.0843789	4.4772	0.0829648	4.26839	0.0851806	4.20768	0.0833665	4.19831	0.0858665	4.08012	0.0852736
		4.01768	0.0908	5.54433	0.0750173			4.21463	0.0736772	4.08592	0.0770637	5.58368	0.0719948	5.35777	0.0726471	5.45104	0.0771386	5.34088	0.0765562	5.19041	0.0761909	5.07647	0.0726994	5.07723	0.0775301	5.08851	0.0774778	5.00456	0.0796471	4.84161	0.0774386	4.76289	0.0784425	4.76307	0.0820909	4.68568	0.0831354	4.64706	0.0842431	4.4946	0.0827386	4.28783	0.0850562	4.2242	0.0831516	4.21437	0.0856516	4.10275	0.0851039
		4.01768	0.0933	6.14186	0.0715235			4.26155	0.0736277	4.14267	0.0770178	5.61292	0.0717789	5.38399	0.072459	5.49473	0.0769993	5.38981	0.0764796	5.20988	0.0760794	5.10183	0.0725392	5.09707	0.0774395	5.13797	0.0773594	5.03461	0.079459	4.86298	0.0772993	4.79281	0.0781988	4.79518	0.0819794	4.71198	0.0830797	4.66724	0.0841596	4.51347	0.0825993	4.30893	0.0849796	4.24212	0.0830193	4.23178	0.0855193	4.12729	0.0849995
		3.66166	0.0925	6.8714	0.0682403			4.31034	0.073611	4.20168	0.0770022	5.64334	0.071706	5.41125	0.0723955	5.54017	0.0769523	5.4407	0.0764537	5.23013	0.0760418	5.12821	0.0724851	5.11771	0.077409	5.18941	0.0773194	5.06586	0.0793955	4.8852	0.0772523	4.82393	0.0781164	4.82859	0.0819418	4.73934	0.0830609	4.68823	0.0841314	4.53309	0.0825523	4.33088	0.0849537	4.26076	0.0829746	4.24989	0.0854746	4.15282	0.0849642
		3.76081	0.0969	7.78202	0.0651539			4.35914	0.0736277	4.26069	0.0770178	5.67376	0.0717789	5.43852	0.072459	5.5856	0.0769993	5.49158	0.0764796	5.25037	0.0760794	5.15458	0.0725392	5.13834	0.0774395	5.24085	0.0773594	5.09711	0.079459	4.90742	0.0772993	4.85504	0.0781988	4.86199	0.0819794	4.76669	0.0830797	4.70922	0.0841596	4.55272	0.0825993	4.35282	0.0849796	4.2794	0.0830193	4.26801	0.0855193	4.17835	0.0849995
		3.58552	0.09739	8.95054	0.0622515			4.40606	0.0736772	4.31744	0.0770637	5.703	0.0719948	5.46474	0.0726471	5.62929	0.0771386	5.54052	0.0765562	5.26984	0.0761909	5.17994	0.0726994	5.15819	0.0775301	5.29032	0.0774778	5.12715	0.0796471	4.92879	0.0774386	4.88496	0.0784425	4.8941	0.0820909	4.79299	0.0831354	4.72941	0.0842431	4.57159	0.0827386	4.37392	0.0850562	4.29732	0.0831516	4.28542	0.0856516	4.2029	0.0851039
		3.52609	0.0991	10.5044	0.059521			4.44931	0.0737575	4.36974	0.0771384	5.72996	0.0723454	5.4889	0.0729524	5.66956	0.0773648	5.58561	0.0766806	5.28778	0.0763718	5.20331	0.0729595	5.17647	0.0776771	5.3359	0.0776701	5.15485	0.0799524	4.94848	0.0776648	4.91253	0.0788384	4.9237	0.0822718	4.81723	0.0832259	4.74801	0.0843789	4.58898	0.0829648	4.39337	0.0851806	4.31384	0.0833665	4.30147	0.0858665	4.22553	0.0852736
		3.53357	0.0999	12.6715	0.0569515			4.48721	0.0738656	4.41557	0.0772388	5.75358	0.0728172	5.51008	0.0733634	5.70485	0.0776692	5.62514	0.076848	5.30351	0.0766153	5.22379	0.0733096	5.1925	0.077875	5.37586	0.0779288	5.17912	0.0803634	4.96575	0.0779692	4.9367	0.0793711	4.94965	0.0825153	4.83847	0.0833477	4.76432	0.0845615	4.60422	0.0832692	4.41042	0.085348	4.32831	0.0836557	4.31554	0.0861557	4.24536	0.0855019
		3.59583	0.1022	15.9039	0.0545325			4.51831	0.0739972	4.45319	0.0773612	5.77297	0.0733922	5.52747	0.0738641	5.73382	0.0780401	5.65758	0.0770521	5.31642	0.0769121	5.2406	0.0737361	5.20566	0.0781161	5.40865	0.0782441	5.19904	0.0808641	4.97991	0.0783401	4.95654	0.0800202	4.97094	0.0828121	4.85591	0.083496	4.7777	0.0847841	4.61674	0.0836401	4.4244	0.0855521	4.3402	0.0840081	4.32709	0.0865081	4.26163	0.0857801
		3.53857	0.10027	21.2417	0.0522543			4.54143	0.0741475	4.48115	0.0775009	5.78738	0.0740481	5.54038	0.0744354	5.75534	0.0784633	5.68168	0.0772848	5.32601	0.0772506	5.2531	0.0742228	5.21543	0.0783911	5.43301	0.0786038	5.21384	0.0814354	4.99044	0.0787633	4.97127	0.0807608	4.98676	0.0831506	4.86886	0.0836653	4.78764	0.085038	4.62603	0.0840633	4.4348	0.0857848	4.34902	0.0844101	4.33567	0.0869101	4.27373	0.0860975
		3.51617	0.101	31.7347	0.0501079			4.55566	0.0743105	4.49836	0.0776524	5.79625	0.0747598	5.54833	0.0750553	5.76859	0.0789225	5.69653	0.0775374	5.33191	0.077618	5.26079	0.0747508	5.22145	0.0786896	5.44802	0.0789941	5.22296	0.0820553	4.99692	0.0792225	4.98035	0.0815643	4.9965	0.083518	4.87684	0.083849	4.79377	0.0853135	4.63176	0.0845225	4.4412	0.0860374	4.35446	0.0848463	4.34095	0.0873463	4.28117	0.0864419
		3.44947	0.0999	35	0.0498883			4.56047	0.07448	4.50417	0.07781	5.79925	0.0755	5.55102	0.0757	5.77307	0.0794	5.70154	0.0778	5.33391	0.078	5.26339	0.0753	5.22349	0.079	5.45309	0.0794	5.22604	0.0827	4.99911	0.0797	4.98341	0.0824	4.99979	0.0839	4.87953	0.08404	4.79583	0.0856	4.63369	0.085	4.44336	0.0863	4.3563	0.0853	4.34274	0.0878	4.28369	0.0868
		3.51124	0.102	IsoLine	IsoLine
		3.58166	0.10168
		3.45304	0.101
		3.45901	0.1038
		3.31675	0.1063
		3.25945	0.1075
		3.2041	0.1074
		3.28084	0.10822
		2.30256	0.1633
		2.079	0.175
		2.04165	0.1832
		5.48546	0.0801
		3.56506	0.11
		4.75059	0.0885
		7.40741	0.0816
		IsoLine	IsoLine
[truncated: 54 more columns]

## Sheet: PlotDat8
Source sheet	All U-Pb data	4.31034	0.07448	1.6071	0.24	31.7347	0.0501079	4.56047	0.07448	4.50417	0.07781	5.79925	0.0755	5.55102	0.0757	5.77307	0.0794	5.70154	0.0778	5.33391	0.078	5.26339	0.0753	5.22349	0.079	5.45309	0.0794	5.22604	0.0827	4.99911	0.0797	4.98341	0.0824	4.99979	0.0839	4.87953	0.08404	4.79583	0.0856	4.63369	0.085	4.44336	0.0863	4.3563	0.0853	4.34274	0.0878	4.28369	0.0868
Plot name	Concordia8	4.20168	0.07781	1.62168	0.236498	15.6212	0.0547005	4.55566	0.0746495	4.49836	0.0779676	5.79625	0.0762402	5.54833	0.0763447	5.76859	0.0798775	5.69653	0.0780626	5.33191	0.078382	5.26079	0.0758492	5.22145	0.0793104	5.44802	0.0798059	5.22296	0.0833447	4.99692	0.0801775	4.98035	0.0832357	4.9965	0.084282	4.87684	0.084231	4.79377	0.0858865	4.63176	0.0854775	4.4412	0.0865626	4.35446	0.0857537	4.34095	0.0882537	4.28117	0.0871581
Plot Type	1	5.64334	0.0755	1.68745	0.222656	10.2518	0.059901	4.54143	0.0748125	4.48115	0.0781191	5.78738	0.0769519	5.54038	0.0769646	5.75534	0.0803367	5.68168	0.0783152	5.32601	0.0787494	5.2531	0.0763772	5.21543	0.0796089	5.43301	0.0801962	5.21384	0.0839646	4.99044	0.0806367	4.97127	0.0840392	4.98676	0.0846494	4.86886	0.0844147	4.78764	0.086162	4.62603	0.0859367	4.4348	0.0868152	4.34902	0.0861899	4.33567	0.0886899	4.27373	0.0875025
1st free col	105	5.41125	0.0757	1.75767	0.209729	7.56836	0.0657994	4.51831	0.0749628	4.45319	0.0782588	5.77297	0.0776078	5.52747	0.0775359	5.73382	0.0807599	5.65758	0.0785479	5.31642	0.0790879	5.2406	0.0768639	5.20566	0.0798839	5.40865	0.0805559	5.19904	0.0845359	4.97991	0.0810599	4.95654	0.0847798	4.97094	0.0849879	4.85591	0.084584	4.7777	0.0864159	4.61674	0.0863599	4.4244	0.0870479	4.3402	0.0865919	4.32709	0.0890919	4.26163	0.0878199
Sigma Level	2	5.54017	0.0794	1.8328	0.197651	5.95934	0.0724996	4.48721	0.0750944	4.41557	0.0783812	5.75358	0.0781828	5.51008	0.0780366	5.70485	0.0811308	5.62514	0.078752	5.30351	0.0793847	5.22379	0.0772904	5.1925	0.080125	5.37586	0.0808712	5.17912	0.0850366	4.96575	0.0814308	4.9367	0.0854289	4.94965	0.0852847	4.83847	0.0847323	4.76432	0.0866385	4.60422	0.0867308	4.41042	0.087252	4.32831	0.0869443	4.31554	0.0894443	4.24536	0.0880981
Absolute Errs	TRUE	5.4407	0.0778	1.91338	0.186365	4.88752	0.0801223	4.44931	0.0752025	4.36974	0.0784816	5.72996	0.0786546	5.4889	0.0784476	5.66956	0.0814352	5.58561	0.0789194	5.28778	0.0796282	5.20331	0.0776405	5.17647	0.0803229	5.3359	0.0811299	5.15485	0.0854476	4.94848	0.0817352	4.91253	0.0859616	4.9237	0.0855282	4.81723	0.0848541	4.74801	0.0868211	4.58898	0.0870352	4.39337	0.0874194	4.31384	0.0872335	4.30147	0.0897335	4.22553	0.0883264
Symbol Type	1	5.23013	0.078	2	0.175816	4.12267	0.088807	4.40606	0.0752828	4.31744	0.0785563	5.703	0.0790052	5.46474	0.0787529	5.62929	0.0816614	5.54052	0.0790438	5.26984	0.0798091	5.17994	0.0779006	5.15819	0.0804699	5.29032	0.0813222	5.12715	0.0857529	4.92879	0.0819614	4.88496	0.0863575	4.8941	0.0857091	4.79299	0.0849446	4.72941	0.0869569	4.57159	0.0872614	4.37392	0.0875438	4.29732	0.0874484	4.28542	0.0899484	4.2029	0.0884961
Inverse Plot	TRUE	5.12821	0.0753	2.09336	0.165954	3.54967	0.0987156	4.35914	0.0753323	4.26069	0.0786022	5.67376	0.0792211	5.43852	0.078941	5.5856	0.0818007	5.49158	0.0791204	5.25037	0.0799206	5.15458	0.0780608	5.13834	0.0805605	5.24085	0.0814406	5.09711	0.085941	4.90742	0.0821007	4.85504	0.0866012	4.86199	0.0858206	4.76669	0.0850003	4.70922	0.0870404	4.55272	0.0874007	4.35282	0.0876204	4.2794	0.0875807	4.26801	0.0900807	4.17835	0.0886005
Color Plot	TRUE	5.11771	0.079	2.19427	0.15673	3.10458	0.110036	4.31034	0.075349	4.20168	0.0786178	5.64334	0.079294	5.41125	0.0790045	5.54017	0.0818477	5.4407	0.0791463	5.23013	0.0799582	5.12821	0.0781149	5.11771	0.080591	5.18941	0.0814806	5.06586	0.0860045	4.8852	0.0821477	4.82393	0.0866836	4.82859	0.0858582	4.73934	0.0850191	4.68823	0.0870686	4.53309	0.0874477	4.33088	0.0876463	4.26076	0.0876254	4.24989	0.0901254	4.15282	0.0886358
3D plot	FALSE	5.18941	0.0794	2.30366	0.148103	2.74902	0.122987	4.26155	0.0753323	4.14267	0.0786022	5.61292	0.0792211	5.38399	0.078941	5.49473	0.0818007	5.38981	0.0791204	5.20988	0.0799206	5.10183	0.0780608	5.09707	0.0805605	5.13797	0.0814406	5.03461	0.085941	4.86298	0.0821007	4.79281	0.0866012	4.79518	0.0858206	4.71198	0.0850003	4.66724	0.0870404	4.51347	0.0874007	4.30893	0.0876204	4.24212	0.0875807	4.23178	0.0900807	4.12729	0.0886005
Linear	FALSE	5.06586	0.0827	2.42264	0.140031	2.45857	0.137821	4.21463	0.0752828	4.08592	0.0785563	5.58368	0.0790052	5.35777	0.0787529	5.45104	0.0816614	5.34088	0.0790438	5.19041	0.0798091	5.07647	0.0779006	5.07723	0.0804699	5.08851	0.0813222	5.00456	0.0857529	4.84161	0.0819614	4.76289	0.0863575	4.76307	0.0857091	4.68568	0.0849446	4.64706	0.0869569	4.4946	0.0872614	4.28783	0.0875438	4.2242	0.0874484	4.21437	0.0899484	4.10275	0.0884961
Data Range	C171:F218	4.8852	0.0797	2.55251	0.132475	2.21696	0.154833	4.17138	0.0752025	4.03363	0.0784816	5.55672	0.0786546	5.33361	0.0784476	5.41077	0.0814352	5.29578	0.0789194	5.17247	0.0796282	5.0531	0.0776405	5.05894	0.0803229	5.04293	0.0811299	4.97686	0.0854476	4.82191	0.0817352	4.73532	0.0859616	4.73347	0.0855282	4.66145	0.0848541	4.62845	0.0868211	4.4772	0.0870352	4.26839	0.0874194	4.20768	0.0872335	4.19831	0.0897335	4.08012	0.0883264
Filled Symbols	TRUE	4.82393	0.0824	2.69483	0.125402	2.01291	0.174366	4.13348	0.0750944	3.98779	0.0783812	5.5331	0.0781828	5.31243	0.0780366	5.37548	0.0811308	5.25625	0.078752	5.15674	0.0793847	5.03262	0.0772904	5.04291	0.080125	5.00297	0.0808712	4.95259	0.0850366	4.80465	0.0814308	4.71115	0.0854289	4.70752	0.0852847	4.6402	0.0847323	4.61215	0.0866385	4.46196	0.0867308	4.25134	0.087252	4.1932	0.0869443	4.18425	0.0894443	4.06029	0.0880981
ConcAge	FALSE	4.82859	0.0839	2.85146	0.118779	1.83837	0.196819	4.10238	0.0749628	3.95017	0.0782588	5.51371	0.0776078	5.29504	0.0775359	5.34651	0.0807599	5.22381	0.0785479	5.14383	0.0790879	5.01581	0.0768639	5.02975	0.0798839	4.97018	0.0805559	4.93267	0.0845359	4.79048	0.0810599	4.69132	0.0847798	4.68623	0.0849879	4.62277	0.084584	4.59877	0.0864159	4.44945	0.0863599	4.23735	0.0870479	4.18132	0.0865919	4.1727	0.0890919	4.04402	0.0878199
ConcSwap	FALSE	4.73934	0.08404	3.02463	0.112574	1.68745	0.222656	4.07926	0.0748125	3.92222	0.0781191	5.4993	0.0769519	5.28213	0.0769646	5.32499	0.0803367	5.19971	0.0783152	5.13424	0.0787494	5.00331	0.0763772	5.01998	0.0796089	4.94581	0.0801962	4.91787	0.0839646	4.77996	0.0806367	4.67658	0.0840392	4.67041	0.0846494	4.60981	0.0844147	4.58882	0.086162	4.44015	0.0859367	4.22696	0.0868152	4.17249	0.0861899	4.16412	0.0886899	4.03192	0.0875025
1st Symbol-row	1	4.68823	0.0856	3.21711	0.10676	IsoLine	IsoLine	4.06503	0.0746495	3.905	0.0779676	5.49043	0.0762402	5.27418	0.0763447	5.31174	0.0798775	5.18487	0.0780626	5.12834	0.078382	4.99562	0.0758492	5.01396	0.0793104	4.93081	0.0798059	4.90875	0.0833447	4.77348	0.0801775	4.6675	0.0832357	4.66067	0.084282	4.60183	0.084231	4.5827	0.0858865	4.43443	0.0854775	4.22056	0.0865626	4.16706	0.0857537	4.15884	0.0882537	4.02448	0.0871581
		4.53309	0.085	3.43229	0.101311			4.06022	0.07448	3.89919	0.07781	5.48743	0.0755	5.27149	0.0757	5.30726	0.0794	5.17985	0.0778	5.12634	0.078	4.99302	0.0753	5.01193	0.079	4.92574	0.0794	4.90567	0.0827	4.77129	0.0797	4.66444	0.0824	4.65738	0.0839	4.59914	0.08404	4.58063	0.0856	4.43249	0.085	4.2184	0.0863	4.16522	0.0853	4.15705	0.0878	4.02196	0.0868
		4.33088	0.0863	3.6744	0.0962022			4.06503	0.0743105	3.905	0.0776524	5.49043	0.0747598	5.27418	0.0750553	5.31174	0.0789225	5.18487	0.0775374	5.12834	0.077618	4.99562	0.0747508	5.01396	0.0786896	4.93081	0.0789941	4.90875	0.0820553	4.77348	0.0792225	4.6675	0.0815643	4.66067	0.083518	4.60183	0.083849	4.5827	0.0853135	4.43443	0.0845225	4.22056	0.0860374	4.16706	0.0848463	4.15884	0.0873463	4.02448	0.0864419
		4.26076	0.0853	3.9488	0.0914107			4.07926	0.0741475	3.92222	0.0775009	5.4993	0.0740481	5.28213	0.0744354	5.32499	0.0784633	5.19971	0.0772848	5.13424	0.0772506	5.00331	0.0742228	5.01998	0.0783911	4.94581	0.0786038	4.91787	0.0814354	4.77996	0.0787633	4.67658	0.0807608	4.67041	0.0831506	4.60981	0.0836653	4.58882	0.085038	4.44015	0.0840633	4.22696	0.0857848	4.17249	0.0844101	4.16412	0.0869101	4.03192	0.0860975
		4.24989	0.0878	4.26237	0.0869154			4.10238	0.0739972	3.95017	0.0773612	5.51371	0.0733922	5.29504	0.0738641	5.34651	0.0780401	5.22381	0.0770521	5.14383	0.0769121	5.01581	0.0737361	5.02975	0.0781161	4.97018	0.0782441	4.93267	0.0808641	4.79048	0.0783401	4.69132	0.0800202	4.68623	0.0828121	4.62277	0.083496	4.59877	0.0847841	4.44945	0.0836401	4.23735	0.0855521	4.18132	0.0840081	4.1727	0.0865081	4.04402	0.0857801
		4.15282	0.0868	4.62412	0.0826968			4.13348	0.0738656	3.98779	0.0772388	5.5331	0.0728172	5.31243	0.0733634	5.37548	0.0776692	5.25625	0.076848	5.15674	0.0766153	5.03262	0.0733096	5.04291	0.077875	5.00297	0.0779288	4.95259	0.0803634	4.80465	0.0779692	4.71115	0.0793711	4.70752	0.0825153	4.6402	0.0833477	4.61215	0.0845615	4.46196	0.0832692	4.25134	0.085348	4.1932	0.0836557	4.18425	0.0861557	4.06029	0.0855019
		4.26803	0.0922	5.04601	0.0787364			4.17138	0.0737575	4.03363	0.0771384	5.55672	0.0723454	5.33361	0.0729524	5.41077	0.0773648	5.29578	0.0766806	5.17247	0.0763718	5.0531	0.0729595	5.05894	0.0776771	5.04293	0.0776701	4.97686	0.0799524	4.82191	0.0776648	4.73532	0.0788384	4.73347	0.0822718	4.66145	0.0832259	4.62845	0.0843789	4.4772	0.0829648	4.26839	0.0851806	4.20768	0.0833665	4.19831	0.0858665	4.08012	0.0852736
		4.01768	0.0908	5.54433	0.0750173			4.21463	0.0736772	4.08592	0.0770637	5.58368	0.0719948	5.35777	0.0726471	5.45104	0.0771386	5.34088	0.0765562	5.19041	0.0761909	5.07647	0.0726994	5.07723	0.0775301	5.08851	0.0774778	5.00456	0.0796471	4.84161	0.0774386	4.76289	0.0784425	4.76307	0.0820909	4.68568	0.0831354	4.64706	0.0842431	4.4946	0.0827386	4.28783	0.0850562	4.2242	0.0831516	4.21437	0.0856516	4.10275	0.0851039
		4.01768	0.0933	6.14186	0.0715235			4.26155	0.0736277	4.14267	0.0770178	5.61292	0.0717789	5.38399	0.072459	5.49473	0.0769993	5.38981	0.0764796	5.20988	0.0760794	5.10183	0.0725392	5.09707	0.0774395	5.13797	0.0773594	5.03461	0.079459	4.86298	0.0772993	4.79281	0.0781988	4.79518	0.0819794	4.71198	0.0830797	4.66724	0.0841596	4.51347	0.0825993	4.30893	0.0849796	4.24212	0.0830193	4.23178	0.0855193	4.12729	0.0849995
		3.66166	0.0925	6.8714	0.0682403			4.31034	0.073611	4.20168	0.0770022	5.64334	0.071706	5.41125	0.0723955	5.54017	0.0769523	5.4407	0.0764537	5.23013	0.0760418	5.12821	0.0724851	5.11771	0.077409	5.18941	0.0773194	5.06586	0.0793955	4.8852	0.0772523	4.82393	0.0781164	4.82859	0.0819418	4.73934	0.0830609	4.68823	0.0841314	4.53309	0.0825523	4.33088	0.0849537	4.26076	0.0829746	4.24989	0.0854746	4.15282	0.0849642
		3.76081	0.0969	7.78202	0.0651539			4.35914	0.0736277	4.26069	0.0770178	5.67376	0.0717789	5.43852	0.072459	5.5856	0.0769993	5.49158	0.0764796	5.25037	0.0760794	5.15458	0.0725392	5.13834	0.0774395	5.24085	0.0773594	5.09711	0.079459	4.90742	0.0772993	4.85504	0.0781988	4.86199	0.0819794	4.76669	0.0830797	4.70922	0.0841596	4.55272	0.0825993	4.35282	0.0849796	4.2794	0.0830193	4.26801	0.0855193	4.17835	0.0849995
		3.58552	0.09739	8.95054	0.0622515			4.40606	0.0736772	4.31744	0.0770637	5.703	0.0719948	5.46474	0.0726471	5.62929	0.0771386	5.54052	0.0765562	5.26984	0.0761909	5.17994	0.0726994	5.15819	0.0775301	5.29032	0.0774778	5.12715	0.0796471	4.92879	0.0774386	4.88496	0.0784425	4.8941	0.0820909	4.79299	0.0831354	4.72941	0.0842431	4.57159	0.0827386	4.37392	0.0850562	4.29732	0.0831516	4.28542	0.0856516	4.2029	0.0851039
		3.52609	0.0991	10.5044	0.059521			4.44931	0.0737575	4.36974	0.0771384	5.72996	0.0723454	5.4889	0.0729524	5.66956	0.0773648	5.58561	0.0766806	5.28778	0.0763718	5.20331	0.0729595	5.17647	0.0776771	5.3359	0.0776701	5.15485	0.0799524	4.94848	0.0776648	4.91253	0.0788384	4.9237	0.0822718	4.81723	0.0832259	4.74801	0.0843789	4.58898	0.0829648	4.39337	0.0851806	4.31384	0.0833665	4.30147	0.0858665	4.22553	0.0852736
		3.53357	0.0999	12.6715	0.0569515			4.48721	0.0738656	4.41557	0.0772388	5.75358	0.0728172	5.51008	0.0733634	5.70485	0.0776692	5.62514	0.076848	5.30351	0.0766153	5.22379	0.0733096	5.1925	0.077875	5.37586	0.0779288	5.17912	0.0803634	4.96575	0.0779692	4.9367	0.0793711	4.94965	0.0825153	4.83847	0.0833477	4.76432	0.0845615	4.60422	0.0832692	4.41042	0.085348	4.32831	0.0836557	4.31554	0.0861557	4.24536	0.0855019
		3.59583	0.1022	15.9039	0.0545325			4.51831	0.0739972	4.45319	0.0773612	5.77297	0.0733922	5.52747	0.0738641	5.73382	0.0780401	5.65758	0.0770521	5.31642	0.0769121	5.2406	0.0737361	5.20566	0.0781161	5.40865	0.0782441	5.19904	0.0808641	4.97991	0.0783401	4.95654	0.0800202	4.97094	0.0828121	4.85591	0.083496	4.7777	0.0847841	4.61674	0.0836401	4.4244	0.0855521	4.3402	0.0840081	4.32709	0.0865081	4.26163	0.0857801
		3.53857	0.10027	21.2417	0.0522543			4.54143	0.0741475	4.48115	0.0775009	5.78738	0.0740481	5.54038	0.0744354	5.75534	0.0784633	5.68168	0.0772848	5.32601	0.0772506	5.2531	0.0742228	5.21543	0.0783911	5.43301	0.0786038	5.21384	0.0814354	4.99044	0.0787633	4.97127	0.0807608	4.98676	0.0831506	4.86886	0.0836653	4.78764	0.085038	4.62603	0.0840633	4.4348	0.0857848	4.34902	0.0844101	4.33567	0.0869101	4.27373	0.0860975
		3.51617	0.101	31.7347	0.0501079			4.55566	0.0743105	4.49836	0.0776524	5.79625	0.0747598	5.54833	0.0750553	5.76859	0.0789225	5.69653	0.0775374	5.33191	0.077618	5.26079	0.0747508	5.22145	0.0786896	5.44802	0.0789941	5.22296	0.0820553	4.99692	0.0792225	4.98035	0.0815643	4.9965	0.083518	4.87684	0.083849	4.79377	0.0853135	4.63176	0.0845225	4.4412	0.0860374	4.35446	0.0848463	4.34095	0.0873463	4.28117	0.0864419
		3.44947	0.0999	35	0.0498883			4.56047	0.07448	4.50417	0.07781	5.79925	0.0755	5.55102	0.0757	5.77307	0.0794	5.70154	0.0778	5.33391	0.078	5.26339	0.0753	5.22349	0.079	5.45309	0.0794	5.22604	0.0827	4.99911	0.0797	4.98341	0.0824	4.99979	0.0839	4.87953	0.08404	4.79583	0.0856	4.63369	0.085	4.44336	0.0863	4.3563	0.0853	4.34274	0.0878	4.28369	0.0868
		3.51124	0.102	IsoLine	IsoLine			ErrEll	ErrEll	ErrEll	ErrEll	ErrEll	ErrEll	ErrEll	ErrEll	ErrEll	ErrEll	ErrEll	ErrEll	ErrEll	ErrEll	ErrEll	ErrEll	ErrEll	ErrEll	ErrEll	ErrEll	ErrEll	ErrEll	ErrEll	ErrEll	ErrEll	ErrEll	ErrEll	ErrEll	ErrEll	ErrEll	ErrEll	ErrEll	ErrEll	ErrEll	ErrEll	ErrEll	ErrEll	ErrEll	ErrEll	ErrEll	ErrEll	ErrEll
		3.58166	0.10168
		3.45304	0.101
		3.45901	0.1038
		3.31675	0.1063
		3.25945	0.1075
		3.2041	0.1074
		3.28084	0.10822
		2.30256	0.1633
		2.079	0.175
		2.04165	0.1832
		5.48546	0.0801
		3.56506	0.11
		4.75059	0.0885
		7.40741	0.0816
		IsoLine	IsoLine
[truncated: 54 more columns]

## Sheet: PlotDat9
		14.1323	0.0553	1.6071	0.24	31.7347	0.0501079	14.45	0.0553	14.2228	0.0583	13.7946	0.0551	13.679	0.0553	13.6472	0.056	13.4442	0.0549	12.8481	0.0585	12.3318	0.0554	6.13469	0.0731	5.94634	0.07384	5.15802	0.0781	4.97426	0.0793	5.5177	0.0778	4.80155	0.0811	4.75872	0.0932	4.43188	0.103	4.29922	0.0877	4.27595	0.0877	4.2376	0.0863	4.39164	0.1063	3.87242	0.0919
		13.8696	0.0583	1.62168	0.236498	15.6212	0.0547005	14.4439	0.0555626	14.216	0.0589685	13.7878	0.0557208	13.6731	0.0556104	13.6401	0.0564059	13.4288	0.0551388	12.8429	0.0590969	12.3244	0.0560208	6.13214	0.0734343	5.94379	0.0740525	5.15546	0.0783626	4.97209	0.0795626	5.50495	0.0780626	4.79963	0.0813388	4.75268	0.0937492	4.42994	0.103263	4.29731	0.0881059	4.27399	0.0881537	4.23548	0.086873	4.38411	0.106825	3.87077	0.0924014
		13.4409	0.0551	1.68745	0.222656	10.2518	0.059901	14.4259	0.0558152	14.1959	0.0596114	13.7677	0.0563177	13.6556	0.0559089	13.6192	0.0567962	13.3832	0.0553684	12.8274	0.0596709	12.3025	0.0566177	6.12462	0.0737557	5.93626	0.0742568	5.1479	0.0786152	4.96567	0.0798152	5.46721	0.0783152	4.79393	0.0815684	4.7348	0.0942772	4.4242	0.103515	4.29166	0.0884962	4.26816	0.0885899	4.22919	0.0874241	4.36183	0.10733	3.86588	0.0928835
		13.3726	0.0553	1.75767	0.209729	7.56836	0.0657994	14.3965	0.0560479	14.1633	0.0602039	13.735	0.0568679	13.6273	0.0561839	13.5853	0.0571559	13.3091	0.0555799	12.8024	0.0601999	12.267	0.0571679	6.11239	0.0740519	5.92402	0.0744452	5.13562	0.0788479	4.95524	0.0800479	5.40591	0.0785479	4.78468	0.0817799	4.70576	0.0947639	4.41486	0.103748	4.28249	0.0888559	4.25871	0.0889919	4.21898	0.0879319	4.32564	0.107796	3.85793	0.0933279
		13.2802	0.056	1.8328	0.197651	5.95934	0.0724996	14.357	0.056252	14.1193	0.0607231	13.691	0.0573501	13.5892	0.056425	13.5397	0.0574712	13.2093	0.0557654	12.7687	0.0606635	12.2192	0.0576501	6.09594	0.0743116	5.90756	0.0746102	5.11909	0.079052	4.94121	0.080252	5.32341	0.078752	4.77223	0.0819654	4.66667	0.0951904	4.4023	0.103952	4.27014	0.0891712	4.24598	0.0893443	4.20524	0.088377	4.27693	0.108204	3.84724	0.0937174
		12.6422	0.0549	1.91338	0.186365	4.88752	0.0801223	14.3088	0.0564194	14.0658	0.0611493	13.6374	0.0577458	13.5428	0.0566229	13.4841	0.0577299	13.0878	0.0559176	12.7276	0.061044	12.161	0.0580458	6.07589	0.0745247	5.8875	0.0747457	5.09896	0.0792194	4.92412	0.0804194	5.2229	0.0789194	4.75707	0.0821176	4.61905	0.0955405	4.38699	0.104119	4.25509	0.0894299	4.23047	0.0896335	4.1885	0.0887423	4.21758	0.108539	3.83421	0.094037
		12.577	0.0585	2	0.175816	4.12267	0.088807	14.2539	0.0565438	14.0048	0.061466	13.5762	0.0580399	13.4898	0.0567699	13.4206	0.0579222	12.9491	0.0560307	12.6807	0.0613268	12.0945	0.0583399	6.05302	0.074683	5.86461	0.0748463	5.07598	0.0793438	4.90462	0.0805438	5.10821	0.0790438	4.73976	0.0822307	4.56471	0.0958006	4.36953	0.104244	4.23792	0.0896222	4.21278	0.0898484	4.1694	0.0890137	4.14987	0.108788	3.81935	0.0942745
		11.9474	0.0554	2.09336	0.165954	3.54967	0.0987156	14.1943	0.0566204	13.9385	0.061661	13.5099	0.0582209	13.4323	0.0568605	13.3518	0.0580406	12.7987	0.0561004	12.6299	0.0615009	12.0224	0.0585209	6.02821	0.0747805	5.83978	0.0749083	5.05105	0.0794204	4.88346	0.0806204	4.98378	0.0791204	4.72098	0.0823004	4.50576	0.0959608	4.35058	0.10432	4.21929	0.0897406	4.19359	0.0899807	4.14867	0.0891809	4.07641	0.108941	3.80322	0.0944207
		6.0024	0.0731	2.19427	0.15673	3.10458	0.110036	14.1323	0.0566463	13.8696	0.0617268	13.4409	0.0582821	13.3726	0.056891	13.2802	0.0580806	12.6422	0.0561239	12.577	0.0615597	11.9474	0.0585821	6.0024	0.0748134	5.81395	0.0749292	5.02513	0.0794463	4.86145	0.0806463	4.85437	0.0791463	4.70146	0.0823239	4.44444	0.0960149	4.33088	0.104346	4.19992	0.0897806	4.17362	0.0900254	4.12711	0.0892373	4	0.108993	3.78645	0.0944701
		5.81395	0.07384	2.30366	0.148103	2.74902	0.122987	14.0703	0.0566204	13.8007	0.061661	13.3718	0.0582209	13.3128	0.0568605	13.2086	0.0580406	12.4858	0.0561004	12.5242	0.0615009	11.8725	0.0585209	5.97659	0.0747805	5.78813	0.0749083	4.9992	0.0794204	4.83944	0.0806204	4.72496	0.0791204	4.68193	0.0823004	4.38313	0.0959608	4.31117	0.10432	4.18054	0.0897406	4.15366	0.0899807	4.10556	0.0891809	3.92359	0.108941	3.76967	0.0944207
		5.02513	0.0781	2.42264	0.140031	2.45857	0.137821	14.0107	0.0565438	13.7345	0.061466	13.3055	0.0580399	13.2553	0.0567699	13.1398	0.0579222	12.3353	0.0560307	12.4733	0.0613268	11.8004	0.0583399	5.95178	0.074683	5.76329	0.0748463	4.97427	0.0793438	4.81828	0.0805438	4.60052	0.0790438	4.66315	0.0822307	4.32417	0.0958006	4.29223	0.104244	4.16191	0.0896222	4.13446	0.0898484	4.08483	0.0890137	3.85013	0.108788	3.75354	0.0942745
		4.86145	0.0793	2.55251	0.132475	2.21696	0.154833	13.9557	0.0564194	13.6734	0.0611493	13.2443	0.0577458	13.2023	0.0566229	13.0763	0.0577299	12.1967	0.0559176	12.4265	0.061044	11.7339	0.0580458	5.92891	0.0745247	5.74041	0.0747457	4.9513	0.0792194	4.79878	0.0804194	4.48584	0.0789194	4.64585	0.0821176	4.26984	0.0955405	4.27476	0.104119	4.14474	0.0894299	4.11677	0.0896335	4.06573	0.0887423	3.78242	0.108539	3.73868	0.094037
		4.85437	0.0778	2.69483	0.125402	2.01291	0.174366	13.9076	0.056252	13.6199	0.0607231	13.1907	0.0573501	13.1559	0.056425	13.0207	0.0574712	12.0751	0.0557654	12.3854	0.0606635	11.6757	0.0576501	5.90886	0.0743116	5.72034	0.0746102	4.93116	0.079052	4.78168	0.080252	4.38532	0.078752	4.63068	0.0819654	4.22222	0.0951904	4.25946	0.103952	4.1297	0.0891712	4.10126	0.0893443	4.04899	0.088377	3.72307	0.108204	3.72565	0.0937174
		4.70146	0.0811	2.85146	0.118779	1.83837	0.196819	13.8681	0.0560479	13.576	0.0602039	13.1467	0.0568679	13.1178	0.0561839	12.9751	0.0571559	11.9754	0.0555799	12.3517	0.0601999	11.6279	0.0571679	5.89241	0.0740519	5.70388	0.0744452	4.91463	0.0788479	4.76765	0.0800479	4.30283	0.0785479	4.61823	0.0817799	4.18313	0.0947639	4.2469	0.103748	4.11735	0.0888559	4.08854	0.0889919	4.03525	0.0879319	3.67436	0.107796	3.71496	0.0933279
		4.44444	0.0932	3.02463	0.112574	1.68745	0.222656	13.8387	0.0558152	13.5434	0.0596114	13.114	0.0563177	13.0895	0.0559089	12.9412	0.0567962	11.9013	0.0553684	12.3266	0.0596709	11.5924	0.0566177	5.88019	0.0737557	5.69165	0.0742568	4.90235	0.0786152	4.75723	0.0798152	4.24153	0.0783152	4.60898	0.0815684	4.15409	0.0942772	4.23756	0.103515	4.10817	0.0884962	4.07908	0.0885899	4.02504	0.0874241	3.63817	0.10733	3.70701	0.0928835
		4.33088	0.103	3.21711	0.10676	IsoLine	IsoLine	13.8206	0.0555626	13.5233	0.0589685	13.0939	0.0557208	13.072	0.0556104	12.9203	0.0564059	11.8557	0.0551388	12.3112	0.0590969	11.5705	0.0560208	5.87266	0.0734343	5.68411	0.0740525	4.89479	0.0783626	4.75081	0.0795626	4.20378	0.0780626	4.60329	0.0813388	4.1362	0.0937492	4.23182	0.103263	4.10252	0.0881059	4.07326	0.0881537	4.01875	0.086873	3.61589	0.106825	3.70212	0.0924014
		4.19992	0.0877	3.43229	0.101311			13.8145	0.0553	13.5165	0.0583	13.0871	0.0551	13.0662	0.0553	12.9133	0.056	11.8402	0.0549	12.306	0.0585	11.5631	0.0554	5.87012	0.0731	5.68157	0.07384	4.89223	0.0781	4.74864	0.0793	4.19104	0.0778	4.60136	0.0811	4.13017	0.0932	4.22987	0.103	4.10061	0.0877	4.07129	0.0877	4.01663	0.0863	3.60836	0.1063	3.70047	0.0919
		4.17362	0.0877	3.6744	0.0962022			13.8206	0.0550374	13.5233	0.0576315	13.0939	0.0544792	13.072	0.0549896	12.9203	0.0555941	11.8557	0.0546612	12.3112	0.0579031	11.5705	0.0547792	5.87266	0.0727657	5.68411	0.0736275	4.89479	0.0778374	4.75081	0.0790374	4.20378	0.0775374	4.60329	0.0808612	4.1362	0.0926508	4.23182	0.102737	4.10252	0.0872941	4.07326	0.0872463	4.01875	0.085727	3.61589	0.105775	3.70212	0.0913986
		4.12711	0.0863	3.9488	0.0914107			13.8387	0.0547848	13.5434	0.0569886	13.114	0.0538823	13.0895	0.0546911	12.9412	0.0552038	11.9013	0.0544316	12.3266	0.0573291	11.5924	0.0541823	5.88019	0.0724443	5.69165	0.0734232	4.90235	0.0775848	4.75723	0.0787848	4.24153	0.0772848	4.60898	0.0806316	4.15409	0.0921228	4.23756	0.102485	4.10817	0.0869038	4.07908	0.0868101	4.02504	0.0851759	3.63817	0.10527	3.70701	0.0909165
		4	0.1063	4.26237	0.0869154			13.8681	0.0545521	13.576	0.0563961	13.1467	0.0533321	13.1178	0.0544161	12.9751	0.0548441	11.9754	0.0542201	12.3517	0.0568001	11.6279	0.0536321	5.89241	0.0721481	5.70388	0.0732348	4.91463	0.0773521	4.76765	0.0785521	4.30283	0.0770521	4.61823	0.0804201	4.18313	0.0916361	4.2469	0.102252	4.11735	0.0865441	4.08854	0.0864081	4.03525	0.0846681	3.67436	0.104804	3.71496	0.0904721
		3.78645	0.0919	4.62412	0.0826968			13.9076	0.054348	13.6199	0.0558769	13.1907	0.0528499	13.1559	0.054175	13.0207	0.0545288	12.0751	0.0540346	12.3854	0.0563365	11.6757	0.0531499	5.90886	0.0718884	5.72034	0.0730698	4.93116	0.077148	4.78168	0.078348	4.38532	0.076848	4.63068	0.0802346	4.22222	0.0912096	4.25946	0.102048	4.1297	0.0862288	4.10126	0.0860557	4.04899	0.084223	3.72307	0.104396	3.72565	0.0900826
		3.78358	0.0962	5.04601	0.0787364			13.9557	0.0541806	13.6734	0.0554507	13.2443	0.0524542	13.2023	0.0539771	13.0763	0.0542701	12.1967	0.0538824	12.4265	0.055956	11.7339	0.0527542	5.92891	0.0716753	5.74041	0.0729343	4.9513	0.0769806	4.79878	0.0781806	4.48584	0.0766806	4.64585	0.0800824	4.26984	0.0908595	4.27476	0.101881	4.14474	0.0859701	4.11677	0.0857665	4.06573	0.0838577	3.78242	0.104061	3.73868	0.089763
		3.5461	0.09181	5.54433	0.0750173			14.0107	0.0540562	13.7345	0.055134	13.3055	0.0521601	13.2553	0.0538301	13.1398	0.0540778	12.3353	0.0537693	12.4733	0.0556732	11.8004	0.0524601	5.95178	0.071517	5.76329	0.0728337	4.97427	0.0768562	4.81828	0.0780562	4.60052	0.0765562	4.66315	0.0799693	4.32417	0.0905994	4.29223	0.101756	4.16191	0.0857778	4.13446	0.0855516	4.08483	0.0835863	3.85013	0.103812	3.75354	0.0895255
		3.52983	0.1012	6.14186	0.0715235			14.0703	0.0539796	13.8007	0.054939	13.3718	0.0519791	13.3128	0.0537395	13.2086	0.0539594	12.4858	0.0536996	12.5242	0.0554991	11.8725	0.0522791	5.97659	0.0714195	5.78813	0.0727717	4.9992	0.0767796	4.83944	0.0779796	4.72496	0.0764796	4.68193	0.0798996	4.38313	0.0904392	4.31117	0.10168	4.18054	0.0856594	4.15366	0.0854193	4.10556	0.0834191	3.92359	0.103659	3.76967	0.0893793
		3.51741	0.0984	6.8714	0.0682403			14.1323	0.0539537	13.8696	0.0548732	13.4409	0.0519179	13.3726	0.053709	13.2802	0.0539194	12.6422	0.0536761	12.577	0.0554403	11.9474	0.0522179	6.0024	0.0713866	5.81395	0.0727508	5.02513	0.0767537	4.86145	0.0779537	4.85437	0.0764537	4.70146	0.0798761	4.44444	0.0903851	4.33088	0.101654	4.19992	0.0856194	4.17362	0.0853746	4.12711	0.0833627	4	0.103607	3.78645	0.0893299
		3.50018	0.1042	7.78202	0.0651539			14.1943	0.0539796	13.9385	0.054939	13.5099	0.0519791	13.4323	0.0537395	13.3518	0.0539594	12.7987	0.0536996	12.6299	0.0554991	12.0224	0.0522791	6.02821	0.0714195	5.83978	0.0727717	5.05105	0.0767796	4.88346	0.0779796	4.98378	0.0764796	4.72098	0.0798996	4.50576	0.0904392	4.35058	0.10168	4.21929	0.0856594	4.19359	0.0854193	4.14867	0.0834191	4.07641	0.103659	3.80322	0.0893793
		3.45782	0.1024	8.95054	0.0622515			14.2539	0.0540562	14.0048	0.055134	13.5762	0.0521601	13.4898	0.0538301	13.4206	0.0540778	12.9491	0.0537693	12.6807	0.0556732	12.0945	0.0524601	6.05302	0.071517	5.86461	0.0728337	5.07598	0.0768562	4.90462	0.0780562	5.10821	0.0765562	4.73976	0.0799693	4.56471	0.0905994	4.36953	0.101756	4.23792	0.0857778	4.21278	0.0855516	4.1694	0.0835863	4.14987	0.103812	3.81935	0.0895255
		3.24254	0.1038	10.5044	0.059521			14.3088	0.0541806	14.0658	0.0554507	13.6374	0.0524542	13.5428	0.0539771	13.4841	0.0542701	13.0878	0.0538824	12.7276	0.055956	12.161	0.0527542	6.07589	0.0716753	5.8875	0.0729343	5.09896	0.0769806	4.92412	0.0781806	5.2229	0.0766806	4.75707	0.0800824	4.61905	0.0908595	4.38699	0.101881	4.25509	0.0859701	4.23047	0.0857665	4.1885	0.0838577	4.21758	0.104061	3.83421	0.089763
		2.91971	0.1157	12.6715	0.0569515			14.357	0.054348	14.1193	0.0558769	13.691	0.0528499	13.5892	0.054175	13.5397	0.0545288	13.2093	0.0540346	12.7687	0.0563365	12.2192	0.0531499	6.09594	0.0718884	5.90756	0.0730698	5.11909	0.077148	4.94121	0.078348	5.32341	0.076848	4.77223	0.0802346	4.66667	0.0912096	4.4023	0.102048	4.27014	0.0862288	4.24598	0.0860557	4.20524	0.084223	4.27693	0.104396	3.84724	0.0900826
		2.69469	0.1235	15.9039	0.0545325			14.3965	0.0545521	14.1633	0.0563961	13.735	0.0533321	13.6273	0.0544161	13.5853	0.0548441	13.3091	0.0542201	12.8024	0.0568001	12.267	0.0536321	6.11239	0.0721481	5.92402	0.0732348	5.13562	0.0773521	4.95524	0.0785521	5.40591	0.0770521	4.78468	0.0804201	4.70576	0.0916361	4.41486	0.102252	4.28249	0.0865441	4.25871	0.0864081	4.21898	0.0846681	4.32564	0.104804	3.85793	0.0904721
		IsoLine	IsoLine	21.2417	0.0522543			14.4259	0.0547848	14.1959	0.0569886	13.7677	0.0538823	13.6556	0.0546911	13.6192	0.0552038	13.3832	0.0544316	12.8274	0.0573291	12.3025	0.0541823	6.12462	0.0724443	5.93626	0.0734232	5.1479	0.0775848	4.96567	0.0787848	5.46721	0.0772848	4.79393	0.0806316	4.7348	0.0921228	4.4242	0.102485	4.29166	0.0869038	4.26816	0.0868101	4.22919	0.0851759	4.36183	0.10527	3.86588	0.0909165
				31.7347	0.0501079			14.4439	0.0550374	14.216	0.0576315	13.7878	0.0544792	13.6731	0.0549896	13.6401	0.0555941	13.4288	0.0546612	12.8429	0.0579031	12.3244	0.0547792	6.13214	0.0727657	5.94379	0.0736275	5.15546	0.0778374	4.97209	0.0790374	5.50495	0.0775374	4.79963	0.0808612	4.75268	0.0926508	4.42994	0.102737	4.29731	0.0872941	4.27399	0.0872463	4.23548	0.085727	4.38411	0.105775	3.87077	0.0913986
				35	0.0498883			14.45	0.0553	14.2228	0.0583	13.7946	0.0551	13.679	0.0553	13.6472	0.056	13.4442	0.0549	12.8481	0.0585	12.3318	0.0554	6.13469	0.0731	5.94634	0.07384	5.15802	0.0781	4.97426	0.0793	5.5177	0.0778	4.80155	0.0811	4.75872	0.0932	4.43188	0.103	4.29922	0.0877	4.27595	0.0877	4.2376	0.0863	4.39164	0.1063	3.87242	0.0919
				IsoLine	IsoLine
[truncated: 18 more columns]

## Sheet: PlotDat10
Source sheet	All U-Pb data	14.1323	0.0553	1.6071	0.24	31.7347	0.0501079	14.45	0.0553	14.2228	0.0583	13.7946	0.0551	13.679	0.0553	13.6472	0.056	13.4442	0.0549	12.8481	0.0585	12.3318	0.0554	6.13469	0.0731	5.94634	0.07384	5.15802	0.0781	4.97426	0.0793	5.5177	0.0778	4.80155	0.0811	4.75872	0.0932	4.43188	0.103	4.29922	0.0877	4.27595	0.0877	4.2376	0.0863	4.39164	0.1063	3.87242	0.0919
Plot name	Concordia10	13.8696	0.0583	1.62168	0.236498	15.6212	0.0547005	14.4439	0.0555626	14.216	0.0589685	13.7878	0.0557208	13.6731	0.0556104	13.6401	0.0564059	13.4288	0.0551388	12.8429	0.0590969	12.3244	0.0560208	6.13214	0.0734343	5.94379	0.0740525	5.15546	0.0783626	4.97209	0.0795626	5.50495	0.0780626	4.79963	0.0813388	4.75268	0.0937492	4.42994	0.103263	4.29731	0.0881059	4.27399	0.0881537	4.23548	0.086873	4.38411	0.106825	3.87077	0.0924014
Plot Type	1	13.4409	0.0551	1.68745	0.222656	10.2518	0.059901	14.4259	0.0558152	14.1959	0.0596114	13.7677	0.0563177	13.6556	0.0559089	13.6192	0.0567962	13.3832	0.0553684	12.8274	0.0596709	12.3025	0.0566177	6.12462	0.0737557	5.93626	0.0742568	5.1479	0.0786152	4.96567	0.0798152	5.46721	0.0783152	4.79393	0.0815684	4.7348	0.0942772	4.4242	0.103515	4.29166	0.0884962	4.26816	0.0885899	4.22919	0.0874241	4.36183	0.10733	3.86588	0.0928835
1st free col	69	13.3726	0.0553	1.75767	0.209729	7.56836	0.0657994	14.3965	0.0560479	14.1633	0.0602039	13.735	0.0568679	13.6273	0.0561839	13.5853	0.0571559	13.3091	0.0555799	12.8024	0.0601999	12.267	0.0571679	6.11239	0.0740519	5.92402	0.0744452	5.13562	0.0788479	4.95524	0.0800479	5.40591	0.0785479	4.78468	0.0817799	4.70576	0.0947639	4.41486	0.103748	4.28249	0.0888559	4.25871	0.0889919	4.21898	0.0879319	4.32564	0.107796	3.85793	0.0933279
Sigma Level	2	13.2802	0.056	1.8328	0.197651	5.95934	0.0724996	14.357	0.056252	14.1193	0.0607231	13.691	0.0573501	13.5892	0.056425	13.5397	0.0574712	13.2093	0.0557654	12.7687	0.0606635	12.2192	0.0576501	6.09594	0.0743116	5.90756	0.0746102	5.11909	0.079052	4.94121	0.080252	5.32341	0.078752	4.77223	0.0819654	4.66667	0.0951904	4.4023	0.103952	4.27014	0.0891712	4.24598	0.0893443	4.20524	0.088377	4.27693	0.108204	3.84724	0.0937174
Absolute Errs	TRUE	12.6422	0.0549	1.91338	0.186365	4.88752	0.0801223	14.3088	0.0564194	14.0658	0.0611493	13.6374	0.0577458	13.5428	0.0566229	13.4841	0.0577299	13.0878	0.0559176	12.7276	0.061044	12.161	0.0580458	6.07589	0.0745247	5.8875	0.0747457	5.09896	0.0792194	4.92412	0.0804194	5.2229	0.0789194	4.75707	0.0821176	4.61905	0.0955405	4.38699	0.104119	4.25509	0.0894299	4.23047	0.0896335	4.1885	0.0887423	4.21758	0.108539	3.83421	0.094037
Symbol Type	1	12.577	0.0585	2	0.175816	4.12267	0.088807	14.2539	0.0565438	14.0048	0.061466	13.5762	0.0580399	13.4898	0.0567699	13.4206	0.0579222	12.9491	0.0560307	12.6807	0.0613268	12.0945	0.0583399	6.05302	0.074683	5.86461	0.0748463	5.07598	0.0793438	4.90462	0.0805438	5.10821	0.0790438	4.73976	0.0822307	4.56471	0.0958006	4.36953	0.104244	4.23792	0.0896222	4.21278	0.0898484	4.1694	0.0890137	4.14987	0.108788	3.81935	0.0942745
Inverse Plot	TRUE	11.9474	0.0554	2.09336	0.165954	3.54967	0.0987156	14.1943	0.0566204	13.9385	0.061661	13.5099	0.0582209	13.4323	0.0568605	13.3518	0.0580406	12.7987	0.0561004	12.6299	0.0615009	12.0224	0.0585209	6.02821	0.0747805	5.83978	0.0749083	5.05105	0.0794204	4.88346	0.0806204	4.98378	0.0791204	4.72098	0.0823004	4.50576	0.0959608	4.35058	0.10432	4.21929	0.0897406	4.19359	0.0899807	4.14867	0.0891809	4.07641	0.108941	3.80322	0.0944207
Color Plot	TRUE	6.0024	0.0731	2.19427	0.15673	3.10458	0.110036	14.1323	0.0566463	13.8696	0.0617268	13.4409	0.0582821	13.3726	0.056891	13.2802	0.0580806	12.6422	0.0561239	12.577	0.0615597	11.9474	0.0585821	6.0024	0.0748134	5.81395	0.0749292	5.02513	0.0794463	4.86145	0.0806463	4.85437	0.0791463	4.70146	0.0823239	4.44444	0.0960149	4.33088	0.104346	4.19992	0.0897806	4.17362	0.0900254	4.12711	0.0892373	4	0.108993	3.78645	0.0944701
3D plot	FALSE	5.81395	0.07384	2.30366	0.148103	2.74902	0.122987	14.0703	0.0566204	13.8007	0.061661	13.3718	0.0582209	13.3128	0.0568605	13.2086	0.0580406	12.4858	0.0561004	12.5242	0.0615009	11.8725	0.0585209	5.97659	0.0747805	5.78813	0.0749083	4.9992	0.0794204	4.83944	0.0806204	4.72496	0.0791204	4.68193	0.0823004	4.38313	0.0959608	4.31117	0.10432	4.18054	0.0897406	4.15366	0.0899807	4.10556	0.0891809	3.92359	0.108941	3.76967	0.0944207
Linear	FALSE	5.02513	0.0781	2.42264	0.140031	2.45857	0.137821	14.0107	0.0565438	13.7345	0.061466	13.3055	0.0580399	13.2553	0.0567699	13.1398	0.0579222	12.3353	0.0560307	12.4733	0.0613268	11.8004	0.0583399	5.95178	0.074683	5.76329	0.0748463	4.97427	0.0793438	4.81828	0.0805438	4.60052	0.0790438	4.66315	0.0822307	4.32417	0.0958006	4.29223	0.104244	4.16191	0.0896222	4.13446	0.0898484	4.08483	0.0890137	3.85013	0.108788	3.75354	0.0942745
Data Range	C219:F248	4.86145	0.0793	2.55251	0.132475	2.21696	0.154833	13.9557	0.0564194	13.6734	0.0611493	13.2443	0.0577458	13.2023	0.0566229	13.0763	0.0577299	12.1967	0.0559176	12.4265	0.061044	11.7339	0.0580458	5.92891	0.0745247	5.74041	0.0747457	4.9513	0.0792194	4.79878	0.0804194	4.48584	0.0789194	4.64585	0.0821176	4.26984	0.0955405	4.27476	0.104119	4.14474	0.0894299	4.11677	0.0896335	4.06573	0.0887423	3.78242	0.108539	3.73868	0.094037
Filled Symbols	TRUE	4.85437	0.0778	2.69483	0.125402	2.01291	0.174366	13.9076	0.056252	13.6199	0.0607231	13.1907	0.0573501	13.1559	0.056425	13.0207	0.0574712	12.0751	0.0557654	12.3854	0.0606635	11.6757	0.0576501	5.90886	0.0743116	5.72034	0.0746102	4.93116	0.079052	4.78168	0.080252	4.38532	0.078752	4.63068	0.0819654	4.22222	0.0951904	4.25946	0.103952	4.1297	0.0891712	4.10126	0.0893443	4.04899	0.088377	3.72307	0.108204	3.72565	0.0937174
ConcAge	FALSE	4.70146	0.0811	2.85146	0.118779	1.83837	0.196819	13.8681	0.0560479	13.576	0.0602039	13.1467	0.0568679	13.1178	0.0561839	12.9751	0.0571559	11.9754	0.0555799	12.3517	0.0601999	11.6279	0.0571679	5.89241	0.0740519	5.70388	0.0744452	4.91463	0.0788479	4.76765	0.0800479	4.30283	0.0785479	4.61823	0.0817799	4.18313	0.0947639	4.2469	0.103748	4.11735	0.0888559	4.08854	0.0889919	4.03525	0.0879319	3.67436	0.107796	3.71496	0.0933279
ConcSwap	FALSE	4.44444	0.0932	3.02463	0.112574	1.68745	0.222656	13.8387	0.0558152	13.5434	0.0596114	13.114	0.0563177	13.0895	0.0559089	12.9412	0.0567962	11.9013	0.0553684	12.3266	0.0596709	11.5924	0.0566177	5.88019	0.0737557	5.69165	0.0742568	4.90235	0.0786152	4.75723	0.0798152	4.24153	0.0783152	4.60898	0.0815684	4.15409	0.0942772	4.23756	0.103515	4.10817	0.0884962	4.07908	0.0885899	4.02504	0.0874241	3.63817	0.10733	3.70701	0.0928835
1st Symbol-row	1	4.33088	0.103	3.21711	0.10676	IsoLine	IsoLine	13.8206	0.0555626	13.5233	0.0589685	13.0939	0.0557208	13.072	0.0556104	12.9203	0.0564059	11.8557	0.0551388	12.3112	0.0590969	11.5705	0.0560208	5.87266	0.0734343	5.68411	0.0740525	4.89479	0.0783626	4.75081	0.0795626	4.20378	0.0780626	4.60329	0.0813388	4.1362	0.0937492	4.23182	0.103263	4.10252	0.0881059	4.07326	0.0881537	4.01875	0.086873	3.61589	0.106825	3.70212	0.0924014
		4.19992	0.0877	3.43229	0.101311			13.8145	0.0553	13.5165	0.0583	13.0871	0.0551	13.0662	0.0553	12.9133	0.056	11.8402	0.0549	12.306	0.0585	11.5631	0.0554	5.87012	0.0731	5.68157	0.07384	4.89223	0.0781	4.74864	0.0793	4.19104	0.0778	4.60136	0.0811	4.13017	0.0932	4.22987	0.103	4.10061	0.0877	4.07129	0.0877	4.01663	0.0863	3.60836	0.1063	3.70047	0.0919
		4.17362	0.0877	3.6744	0.0962022			13.8206	0.0550374	13.5233	0.0576315	13.0939	0.0544792	13.072	0.0549896	12.9203	0.0555941	11.8557	0.0546612	12.3112	0.0579031	11.5705	0.0547792	5.87266	0.0727657	5.68411	0.0736275	4.89479	0.0778374	4.75081	0.0790374	4.20378	0.0775374	4.60329	0.0808612	4.1362	0.0926508	4.23182	0.102737	4.10252	0.0872941	4.07326	0.0872463	4.01875	0.085727	3.61589	0.105775	3.70212	0.0913986
		4.12711	0.0863	3.9488	0.0914107			13.8387	0.0547848	13.5434	0.0569886	13.114	0.0538823	13.0895	0.0546911	12.9412	0.0552038	11.9013	0.0544316	12.3266	0.0573291	11.5924	0.0541823	5.88019	0.0724443	5.69165	0.0734232	4.90235	0.0775848	4.75723	0.0787848	4.24153	0.0772848	4.60898	0.0806316	4.15409	0.0921228	4.23756	0.102485	4.10817	0.0869038	4.07908	0.0868101	4.02504	0.0851759	3.63817	0.10527	3.70701	0.0909165
		4	0.1063	4.26237	0.0869154			13.8681	0.0545521	13.576	0.0563961	13.1467	0.0533321	13.1178	0.0544161	12.9751	0.0548441	11.9754	0.0542201	12.3517	0.0568001	11.6279	0.0536321	5.89241	0.0721481	5.70388	0.0732348	4.91463	0.0773521	4.76765	0.0785521	4.30283	0.0770521	4.61823	0.0804201	4.18313	0.0916361	4.2469	0.102252	4.11735	0.0865441	4.08854	0.0864081	4.03525	0.0846681	3.67436	0.104804	3.71496	0.0904721
		3.78645	0.0919	4.62412	0.0826968			13.9076	0.054348	13.6199	0.0558769	13.1907	0.0528499	13.1559	0.054175	13.0207	0.0545288	12.0751	0.0540346	12.3854	0.0563365	11.6757	0.0531499	5.90886	0.0718884	5.72034	0.0730698	4.93116	0.077148	4.78168	0.078348	4.38532	0.076848	4.63068	0.0802346	4.22222	0.0912096	4.25946	0.102048	4.1297	0.0862288	4.10126	0.0860557	4.04899	0.084223	3.72307	0.104396	3.72565	0.0900826
		3.78358	0.0962	5.04601	0.0787364			13.9557	0.0541806	13.6734	0.0554507	13.2443	0.0524542	13.2023	0.0539771	13.0763	0.0542701	12.1967	0.0538824	12.4265	0.055956	11.7339	0.0527542	5.92891	0.0716753	5.74041	0.0729343	4.9513	0.0769806	4.79878	0.0781806	4.48584	0.0766806	4.64585	0.0800824	4.26984	0.0908595	4.27476	0.101881	4.14474	0.0859701	4.11677	0.0857665	4.06573	0.0838577	3.78242	0.104061	3.73868	0.089763
		3.5461	0.09181	5.54433	0.0750173			14.0107	0.0540562	13.7345	0.055134	13.3055	0.0521601	13.2553	0.0538301	13.1398	0.0540778	12.3353	0.0537693	12.4733	0.0556732	11.8004	0.0524601	5.95178	0.071517	5.76329	0.0728337	4.97427	0.0768562	4.81828	0.0780562	4.60052	0.0765562	4.66315	0.0799693	4.32417	0.0905994	4.29223	0.101756	4.16191	0.0857778	4.13446	0.0855516	4.08483	0.0835863	3.85013	0.103812	3.75354	0.0895255
		3.52983	0.1012	6.14186	0.0715235			14.0703	0.0539796	13.8007	0.054939	13.3718	0.0519791	13.3128	0.0537395	13.2086	0.0539594	12.4858	0.0536996	12.5242	0.0554991	11.8725	0.0522791	5.97659	0.0714195	5.78813	0.0727717	4.9992	0.0767796	4.83944	0.0779796	4.72496	0.0764796	4.68193	0.0798996	4.38313	0.0904392	4.31117	0.10168	4.18054	0.0856594	4.15366	0.0854193	4.10556	0.0834191	3.92359	0.103659	3.76967	0.0893793
		3.51741	0.0984	6.8714	0.0682403			14.1323	0.0539537	13.8696	0.0548732	13.4409	0.0519179	13.3726	0.053709	13.2802	0.0539194	12.6422	0.0536761	12.577	0.0554403	11.9474	0.0522179	6.0024	0.0713866	5.81395	0.0727508	5.02513	0.0767537	4.86145	0.0779537	4.85437	0.0764537	4.70146	0.0798761	4.44444	0.0903851	4.33088	0.101654	4.19992	0.0856194	4.17362	0.0853746	4.12711	0.0833627	4	0.103607	3.78645	0.0893299
		3.50018	0.1042	7.78202	0.0651539			14.1943	0.0539796	13.9385	0.054939	13.5099	0.0519791	13.4323	0.0537395	13.3518	0.0539594	12.7987	0.0536996	12.6299	0.0554991	12.0224	0.0522791	6.02821	0.0714195	5.83978	0.0727717	5.05105	0.0767796	4.88346	0.0779796	4.98378	0.0764796	4.72098	0.0798996	4.50576	0.0904392	4.35058	0.10168	4.21929	0.0856594	4.19359	0.0854193	4.14867	0.0834191	4.07641	0.103659	3.80322	0.0893793
		3.45782	0.1024	8.95054	0.0622515			14.2539	0.0540562	14.0048	0.055134	13.5762	0.0521601	13.4898	0.0538301	13.4206	0.0540778	12.9491	0.0537693	12.6807	0.0556732	12.0945	0.0524601	6.05302	0.071517	5.86461	0.0728337	5.07598	0.0768562	4.90462	0.0780562	5.10821	0.0765562	4.73976	0.0799693	4.56471	0.0905994	4.36953	0.101756	4.23792	0.0857778	4.21278	0.0855516	4.1694	0.0835863	4.14987	0.103812	3.81935	0.0895255
		3.24254	0.1038	10.5044	0.059521			14.3088	0.0541806	14.0658	0.0554507	13.6374	0.0524542	13.5428	0.0539771	13.4841	0.0542701	13.0878	0.0538824	12.7276	0.055956	12.161	0.0527542	6.07589	0.0716753	5.8875	0.0729343	5.09896	0.0769806	4.92412	0.0781806	5.2229	0.0766806	4.75707	0.0800824	4.61905	0.0908595	4.38699	0.101881	4.25509	0.0859701	4.23047	0.0857665	4.1885	0.0838577	4.21758	0.104061	3.83421	0.089763
		2.91971	0.1157	12.6715	0.0569515			14.357	0.054348	14.1193	0.0558769	13.691	0.0528499	13.5892	0.054175	13.5397	0.0545288	13.2093	0.0540346	12.7687	0.0563365	12.2192	0.0531499	6.09594	0.0718884	5.90756	0.0730698	5.11909	0.077148	4.94121	0.078348	5.32341	0.076848	4.77223	0.0802346	4.66667	0.0912096	4.4023	0.102048	4.27014	0.0862288	4.24598	0.0860557	4.20524	0.084223	4.27693	0.104396	3.84724	0.0900826
		2.69469	0.1235	15.9039	0.0545325			14.3965	0.0545521	14.1633	0.0563961	13.735	0.0533321	13.6273	0.0544161	13.5853	0.0548441	13.3091	0.0542201	12.8024	0.0568001	12.267	0.0536321	6.11239	0.0721481	5.92402	0.0732348	5.13562	0.0773521	4.95524	0.0785521	5.40591	0.0770521	4.78468	0.0804201	4.70576	0.0916361	4.41486	0.102252	4.28249	0.0865441	4.25871	0.0864081	4.21898	0.0846681	4.32564	0.104804	3.85793	0.0904721
		IsoLine	IsoLine	21.2417	0.0522543			14.4259	0.0547848	14.1959	0.0569886	13.7677	0.0538823	13.6556	0.0546911	13.6192	0.0552038	13.3832	0.0544316	12.8274	0.0573291	12.3025	0.0541823	6.12462	0.0724443	5.93626	0.0734232	5.1479	0.0775848	4.96567	0.0787848	5.46721	0.0772848	4.79393	0.0806316	4.7348	0.0921228	4.4242	0.102485	4.29166	0.0869038	4.26816	0.0868101	4.22919	0.0851759	4.36183	0.10527	3.86588	0.0909165
				31.7347	0.0501079			14.4439	0.0550374	14.216	0.0576315	13.7878	0.0544792	13.6731	0.0549896	13.6401	0.0555941	13.4288	0.0546612	12.8429	0.0579031	12.3244	0.0547792	6.13214	0.0727657	5.94379	0.0736275	5.15546	0.0778374	4.97209	0.0790374	5.50495	0.0775374	4.79963	0.0808612	4.75268	0.0926508	4.42994	0.102737	4.29731	0.0872941	4.27399	0.0872463	4.23548	0.085727	4.38411	0.105775	3.87077	0.0913986
				35	0.0498883			14.45	0.0553	14.2228	0.0583	13.7946	0.0551	13.679	0.0553	13.6472	0.056	13.4442	0.0549	12.8481	0.0585	12.3318	0.0554	6.13469	0.0731	5.94634	0.07384	5.15802	0.0781	4.97426	0.0793	5.5177	0.0778	4.80155	0.0811	4.75872	0.0932	4.43188	0.103	4.29922	0.0877	4.27595	0.0877	4.2376	0.0863	4.39164	0.1063	3.87242	0.0919
				IsoLine	IsoLine			ErrEll	ErrEll	ErrEll	ErrEll	ErrEll	ErrEll	ErrEll	ErrEll	ErrEll	ErrEll	ErrEll	ErrEll	ErrEll	ErrEll	ErrEll	ErrEll	ErrEll	ErrEll	ErrEll	ErrEll	ErrEll	ErrEll	ErrEll	ErrEll	ErrEll	ErrEll	ErrEll	ErrEll	ErrEll	ErrEll	ErrEll	ErrEll	ErrEll	ErrEll	ErrEll	ErrEll	ErrEll	ErrEll	ErrEll	ErrEll	ErrEll	ErrEll
[truncated: 18 more columns]

## Sheet: PlotDat11
Source sheet	All U-Pb data	6.39132	0.0736602	1.6071	0.24	31.7347	0.0501079	6.83443	0.0736602	6.58629	0.0778636	6.14091	0.0758432	5.81158	0.0748352	5.90488	0.0778118	5.79037	0.0754933	5.72692	0.0779798	6.06203	0.0782449	6.04684	0.0797306	5.59358	0.0807844	5.45091	0.0778127	5.37023	0.0779686	5.16395	0.0786131	5.14563	0.0798003	4.91773	0.0819113	4.83278	0.082711	4.70547	0.0856214	4.99255	0.0857151	4.79717	0.0855555	4.76406	0.0864226	4.47204	0.0860706
Plot name	Concordia11	6.1134	0.0778636	1.62168	0.236498	15.6212	0.0547005	6.82591	0.0740688	6.5772	0.0787845	6.136	0.0762364	5.80851	0.0751263	5.90124	0.078337	5.78757	0.0757475	5.72206	0.0797779	6.05336	0.0787761	6.03691	0.0806642	5.59009	0.0812576	5.44679	0.078109	5.36695	0.078607	5.16077	0.0790454	5.14204	0.0803842	4.9147	0.0823393	4.83054	0.0834667	4.7036	0.0859721	4.98663	0.0864719	4.79398	0.0860072	4.76009	0.0869975	4.46969	0.0864835
Plot Type	1	5.88563	0.0758432	1.68745	0.222656	10.2518	0.059901	6.8007	0.0744617	6.55029	0.07967	6.12148	0.0766145	5.7994	0.0754062	5.89046	0.0788421	5.77928	0.0759918	5.70768	0.0815069	6.02771	0.0792869	6.0075	0.0815619	5.57977	0.0817126	5.43456	0.0783939	5.35722	0.0792209	5.15135	0.0794611	5.13142	0.0809457	4.90569	0.0827508	4.82389	0.0841933	4.69806	0.0863092	4.96907	0.0871996	4.78454	0.0864415	4.74831	0.0875502	4.46271	0.0868804
1st free col	129	5.65156	0.0748352	1.75767	0.209729	7.56836	0.0657994	6.75975	0.0748238	6.50659	0.080486	6.09789	0.076963	5.78462	0.0756642	5.87296	0.0793076	5.76583	0.076217	5.68433	0.0831003	5.98604	0.0797577	5.95974	0.0823892	5.563	0.0821319	5.41471	0.0786565	5.34142	0.0797866	5.13605	0.0798442	5.11417	0.0814631	4.89108	0.0831301	4.81309	0.0848629	4.68908	0.0866199	4.94056	0.0878702	4.76921	0.0868419	4.72918	0.0880596	4.45138	0.0872463
Sigma Level	2	5.71547	0.0778118	1.8328	0.197651	5.95934	0.0724996	6.70464	0.0751412	6.44778	0.0812013	6.06614	0.0772685	5.76471	0.0758903	5.8494	0.0797156	5.74773	0.0764144	5.65291	0.084497	5.92997	0.0801703	5.89548	0.0831144	5.54043	0.0824995	5.388	0.0788867	5.32016	0.0802825	5.11546	0.08018	5.09096	0.0819166	4.8714	0.0834625	4.79856	0.0854499	4.67699	0.0868923	4.9022	0.0884581	4.74859	0.0871927	4.70344	0.0885061	4.43614	0.087567
Absolute Errs	TRUE	5.64478	0.0754933	1.91338	0.186365	4.88752	0.0801223	6.6375	0.0754017	6.37612	0.0817883	6.02746	0.0775191	5.74047	0.0760759	5.8207	0.0800504	5.72566	0.0765764	5.61462	0.0856432	5.86165	0.080509	5.81717	0.0837095	5.51294	0.0828011	5.35545	0.0790755	5.29426	0.0806895	5.09037	0.0804556	5.06267	0.0822888	4.84743	0.0837353	4.78085	0.0859316	4.66225	0.0871158	4.85545	0.0889405	4.72345	0.0874807	4.67207	0.0888726	4.41756	0.0878301
Symbol Type	1	5.47424	0.0779798	2	0.175816	4.12267	0.088807	6.56089	0.0755953	6.29436	0.0822245	5.98332	0.0777054	5.7128	0.0762138	5.78795	0.0802992	5.70049	0.0766968	5.57093	0.0864949	5.78371	0.0807606	5.72782	0.0841517	5.48156	0.0830252	5.31832	0.0792159	5.26471	0.0809919	5.06175	0.0806604	5.0304	0.0825654	4.82009	0.083938	4.76065	0.0862895	4.64544	0.0872819	4.80212	0.089299	4.69478	0.0876947	4.63628	0.0891449	4.39637	0.0880257
Inverse Plot	TRUE	5.61117	0.0782449	2.09336	0.165954	3.54967	0.0987156	6.47777	0.0757145	6.20565	0.0824931	5.93543	0.0778201	5.68278	0.0762987	5.75242	0.0804525	5.67318	0.0767709	5.52353	0.0870194	5.69913	0.0809155	5.63088	0.084424	5.44752	0.0831633	5.27802	0.0793023	5.23264	0.0811781	5.0307	0.0807865	4.99539	0.0827357	4.79041	0.0840629	4.73873	0.0865099	4.6272	0.0873841	4.74424	0.0895197	4.66366	0.0878264	4.59745	0.0893125	4.37338	0.0881461
Color Plot	TRUE	5.53006	0.0797306	2.19427	0.15673	3.10458	0.110036	6.39132	0.0757547	6.1134	0.0825838	5.88563	0.0778588	5.65156	0.0763274	5.71547	0.0805042	5.64478	0.0767959	5.47424	0.0871965	5.61117	0.0809679	5.53006	0.084516	5.41212	0.0832099	5.23612	0.0793315	5.19929	0.081241	4.9984	0.0808291	4.95898	0.0827932	4.75955	0.084105	4.71593	0.0865844	4.60823	0.0874187	4.68406	0.0895943	4.6313	0.0878709	4.55707	0.0893692	4.34946	0.0881868
3D plot	FALSE	5.41212	0.0807844	2.30366	0.148103	2.74902	0.122987	6.30487	0.0757145	6.02114	0.0824931	5.83583	0.0778201	5.62034	0.0762987	5.67851	0.0804525	5.61638	0.0767709	5.42494	0.0870194	5.52321	0.0809155	5.42924	0.084424	5.37672	0.0831633	5.19421	0.0793023	5.16594	0.0811781	4.96611	0.0807865	4.92256	0.0827357	4.72869	0.0840629	4.69314	0.0865099	4.58926	0.0873841	4.62388	0.0895197	4.59894	0.0878264	4.51668	0.0893125	4.32555	0.0881461
Linear	FALSE	5.23612	0.0778127	2.42264	0.140031	2.45857	0.137821	6.22175	0.0755953	5.93243	0.0822245	5.78794	0.0777054	5.59032	0.0762138	5.64298	0.0802992	5.58907	0.0766968	5.37754	0.0864949	5.43864	0.0807606	5.33229	0.0841517	5.34268	0.0830252	5.15392	0.0792159	5.13387	0.0809919	4.93505	0.0806604	4.88755	0.0825654	4.69902	0.083938	4.67122	0.0862895	4.57102	0.0872819	4.56601	0.089299	4.56783	0.0876947	4.47785	0.0891449	4.30256	0.0880257
Data Range	C252:F311	5.19929	0.0779686	2.55251	0.132475	2.21696	0.154833	6.14514	0.0754017	5.85067	0.0817883	5.74381	0.0775191	5.56266	0.0760759	5.61023	0.0800504	5.5639	0.0765764	5.33385	0.0856432	5.36069	0.080509	5.24295	0.0837095	5.31131	0.0828011	5.11678	0.0790755	5.10431	0.0806895	4.90643	0.0804556	4.85528	0.0822888	4.67167	0.0837353	4.65102	0.0859316	4.55421	0.0871158	4.51267	0.0889405	4.53915	0.0874807	4.44206	0.0888726	4.28136	0.0878301
Filled Symbols	TRUE	4.9984	0.0786131	2.69483	0.125402	2.01291	0.174366	6.078	0.0751412	5.77901	0.0812013	5.70512	0.0772685	5.53841	0.0758903	5.58153	0.0797156	5.54184	0.0764144	5.29556	0.084497	5.29237	0.0801703	5.16464	0.0831144	5.28381	0.0824995	5.08424	0.0788867	5.07841	0.0802825	4.88134	0.08018	4.82699	0.0819166	4.6477	0.0834625	4.63331	0.0854499	4.53947	0.0868923	4.46592	0.0884581	4.51402	0.0871927	4.4107	0.0885061	4.26279	0.087567
ConcAge	FALSE	4.95898	0.0798003	2.85146	0.118779	1.83837	0.196819	6.02289	0.0748238	5.7202	0.080486	5.67338	0.076963	5.51851	0.0756642	5.55798	0.0793076	5.52373	0.076217	5.26414	0.0831003	5.2363	0.0797577	5.10037	0.0823892	5.26125	0.0821319	5.05752	0.0786565	5.05715	0.0797866	4.86076	0.0798442	4.80378	0.0814631	4.62803	0.0831301	4.61878	0.0848629	4.52738	0.0866199	4.42756	0.0878702	4.49339	0.0868419	4.38495	0.0880596	4.24755	0.0872463
ConcSwap	FALSE	4.75955	0.0819113	3.02463	0.112574	1.68745	0.222656	5.98194	0.0744617	5.6765	0.07967	5.64978	0.0766145	5.50372	0.0754062	5.54047	0.0788421	5.51028	0.0759918	5.24079	0.0815069	5.19464	0.0792869	5.05261	0.0815619	5.24448	0.0817126	5.03767	0.0783939	5.04135	0.0792209	4.84546	0.0794611	4.78653	0.0809457	4.61341	0.0827508	4.60798	0.0841933	4.51839	0.0863092	4.39905	0.0871996	4.47806	0.0864415	4.36583	0.0875502	4.23622	0.0868804
1st Symbol-row	1	4.71593	0.082711	3.21711	0.10676	IsoLine	IsoLine	5.95673	0.0740688	5.64959	0.0787845	5.63526	0.0762364	5.49462	0.0751263	5.52969	0.078337	5.50199	0.0757475	5.22641	0.0797779	5.16898	0.0787761	5.02321	0.0806642	5.23415	0.0812576	5.02545	0.078109	5.03163	0.078607	4.83604	0.0790454	4.77591	0.0803842	4.60441	0.0823393	4.60133	0.0834667	4.51286	0.0859721	4.38149	0.0864719	4.46862	0.0860072	4.35405	0.0869975	4.22924	0.0864835
		4.60823	0.0856214	3.43229	0.101311			5.94821	0.0736602	5.64051	0.0778636	5.63035	0.0758432	5.49154	0.0748352	5.52605	0.0778118	5.49919	0.0754933	5.22156	0.0779798	5.16032	0.0782449	5.01328	0.0797306	5.23067	0.0807844	5.02132	0.0778127	5.02834	0.0779686	4.83286	0.0786131	4.77233	0.0798003	4.60137	0.0819113	4.59909	0.082711	4.51099	0.0856214	4.37557	0.0857151	4.46544	0.0855555	4.35007	0.0864226	4.22689	0.0860706
		4.68406	0.0857151	3.6744	0.0962022			5.95673	0.0732516	5.64959	0.0769427	5.63526	0.0754499	5.49462	0.074544	5.52969	0.0772865	5.50199	0.0752392	5.22641	0.0761817	5.16898	0.0777137	5.02321	0.0787971	5.23415	0.0803112	5.02545	0.0775164	5.03163	0.0773301	4.83604	0.0781808	4.77591	0.0792164	4.60441	0.0814833	4.60133	0.0819553	4.51286	0.0852708	4.38149	0.0849583	4.46862	0.0851037	4.35405	0.0858478	4.22924	0.0856578
		4.6313	0.0855555	3.9488	0.0914107			5.98194	0.0728586	5.6765	0.0760572	5.64978	0.0750718	5.50372	0.0742641	5.54047	0.0767814	5.51028	0.0749948	5.24079	0.0744527	5.19464	0.0772029	5.05261	0.0778994	5.24448	0.0798563	5.03767	0.0772315	5.04135	0.0767162	4.84546	0.0777651	4.78653	0.078655	4.61341	0.0810718	4.60798	0.0812287	4.51839	0.0849336	4.39905	0.0842306	4.47806	0.0846694	4.36583	0.085295	4.23622	0.0852608
		4.55707	0.0864226	4.26237	0.0869154			6.02289	0.0724965	5.7202	0.0752412	5.67338	0.0747233	5.51851	0.0740061	5.55798	0.0763159	5.52373	0.0747696	5.26414	0.0728593	5.2363	0.0767321	5.10037	0.077072	5.26125	0.0794369	5.05752	0.0769689	5.05715	0.0761505	4.86076	0.0773819	4.80378	0.0781375	4.62803	0.0806925	4.61878	0.0805591	4.52738	0.0846229	4.42756	0.0835599	4.49339	0.084269	4.38495	0.0847856	4.24755	0.084895
		4.34946	0.0860706	4.62412	0.0826968			6.078	0.0721791	5.77901	0.0745259	5.70512	0.0744179	5.53841	0.07378	5.58153	0.0759079	5.54184	0.0745722	5.29556	0.0714626	5.29237	0.0763195	5.16464	0.0763469	5.28381	0.0790694	5.08424	0.0767388	5.07841	0.0756546	4.88134	0.0770461	4.82699	0.077684	4.6477	0.08036	4.63331	0.0799721	4.53947	0.0843506	4.46592	0.082972	4.51402	0.0839182	4.4107	0.0843391	4.26279	0.0845743
		4.34162	0.086208	5.04601	0.0787364			6.14514	0.0719186	5.85067	0.0739389	5.74381	0.0741672	5.56266	0.0735944	5.61023	0.0755731	5.5639	0.0744102	5.33385	0.0703164	5.36069	0.0759809	5.24295	0.0757518	5.31131	0.0787677	5.11678	0.0765499	5.10431	0.0752476	4.90643	0.0767705	4.85528	0.0773118	4.67167	0.0800872	4.65102	0.0794904	4.55421	0.0841271	4.51267	0.0824896	4.53915	0.0836302	4.44206	0.0839727	4.28136	0.0843111
		4.41376	0.0904282	5.54433	0.0750173			6.22175	0.0717251	5.93243	0.0735027	5.78794	0.073981	5.59032	0.0734565	5.64298	0.0753243	5.58907	0.0742899	5.37754	0.0694647	5.43864	0.0757292	5.33229	0.0753095	5.34268	0.0785436	5.15392	0.0764095	5.13387	0.0749452	4.93505	0.0765658	4.88755	0.0770352	4.69902	0.0798845	4.67122	0.0791325	4.57102	0.083961	4.56601	0.0821311	4.56783	0.0834162	4.47785	0.0837004	4.30256	0.0841156
		4.26291	0.0871835	6.14186	0.0715235			6.30487	0.0716059	6.02114	0.0732341	5.83583	0.0738663	5.62034	0.0733716	5.67851	0.0751711	5.61638	0.0742157	5.42494	0.0689402	5.52321	0.0755743	5.42924	0.0750372	5.37672	0.0784056	5.19421	0.0763231	5.16594	0.074759	4.96611	0.0764397	4.92256	0.0768649	4.72869	0.0797597	4.69314	0.0789121	4.58926	0.0838587	4.62388	0.0819104	4.59894	0.0832845	4.51668	0.0835327	4.32555	0.0839952
		4.46012	0.0897751	6.8714	0.0682403			6.39132	0.0715656	6.1134	0.0731434	5.88563	0.0738275	5.65156	0.073343	5.71547	0.0751193	5.64478	0.0741907	5.47424	0.0687631	5.61117	0.075522	5.53006	0.0749453	5.41212	0.078359	5.23612	0.0762939	5.19929	0.0746961	4.9984	0.0763971	4.95898	0.0768074	4.75955	0.0797175	4.71593	0.0788376	4.60823	0.0838242	4.68406	0.0818358	4.6313	0.08324	4.55707	0.0834761	4.34946	0.0839545
		4.22606	0.0919329	7.78202	0.0651539			6.47777	0.0716059	6.20565	0.0732341	5.93543	0.0738663	5.68278	0.0733716	5.75242	0.0751711	5.67318	0.0742157	5.52353	0.0689402	5.69913	0.0755743	5.63088	0.0750372	5.44752	0.0784056	5.27802	0.0763231	5.23264	0.074759	5.0307	0.0764397	4.99539	0.0768649	4.79041	0.0797597	4.73873	0.0789121	4.6272	0.0838587	4.74424	0.0819104	4.66366	0.0832845	4.59745	0.0835327	4.37338	0.0839952
		3.91404	0.0907132	8.95054	0.0622515			6.56089	0.0717251	6.29436	0.0735027	5.98332	0.073981	5.7128	0.0734565	5.78795	0.0753243	5.70049	0.0742899	5.57093	0.0694647	5.78371	0.0757292	5.72782	0.0753095	5.48156	0.0785436	5.31832	0.0764095	5.26471	0.0749452	5.06175	0.0765658	5.0304	0.0770352	4.82009	0.0798845	4.76065	0.0791325	4.64544	0.083961	4.80212	0.0821311	4.69478	0.0834162	4.63628	0.0837004	4.39637	0.0841156
		4.05299	0.0927191	10.5044	0.059521			6.6375	0.0719186	6.37612	0.0739389	6.02746	0.0741672	5.74047	0.0735944	5.8207	0.0755731	5.72566	0.0744102	5.61462	0.0703164	5.86165	0.0759809	5.81717	0.0757518	5.51294	0.0787677	5.35545	0.0765499	5.29426	0.0752476	5.09037	0.0767705	5.06267	0.0773118	4.84743	0.0800872	4.78085	0.0794904	4.66225	0.0841271	4.85545	0.0824896	4.72345	0.0836302	4.67207	0.0839727	4.41756	0.0843111
		4.20291	0.0934249	12.6715	0.0569515			6.70464	0.0721791	6.44778	0.0745259	6.06614	0.0744179	5.76471	0.07378	5.8494	0.0759079	5.74773	0.0745722	5.65291	0.0714626	5.92997	0.0763195	5.89548	0.0763469	5.54043	0.0790694	5.388	0.0767388	5.32016	0.0756546	5.11546	0.0770461	5.09096	0.077684	4.8714	0.08036	4.79856	0.0799721	4.67699	0.0843506	4.9022	0.082972	4.74859	0.0839182	4.70344	0.0843391	4.43614	0.0845743
		3.93169	0.0928377	15.9039	0.0545325			6.75975	0.0724965	6.50659	0.0752412	6.09789	0.0747233	5.78462	0.0740061	5.87296	0.0763159	5.76583	0.0747696	5.68433	0.0728593	5.98604	0.0767321	5.95974	0.077072	5.563	0.0794369	5.41471	0.0769689	5.34142	0.0761505	5.13605	0.0773819	5.11417	0.0781375	4.89108	0.0806925	4.81309	0.0805591	4.68908	0.0846229	4.94056	0.0835599	4.76921	0.084269	4.72918	0.0847856	4.45138	0.084895
		3.89767	0.0952241	21.2417	0.0522543			6.8007	0.0728586	6.55029	0.0760572	6.12148	0.0750718	5.7994	0.0742641	5.89046	0.0767814	5.77928	0.0749948	5.70768	0.0744527	6.02771	0.0772029	6.0075	0.0778994	5.57977	0.0798563	5.43456	0.0772315	5.35722	0.0767162	5.15135	0.0777651	5.13142	0.078655	4.90569	0.0810718	4.82389	0.0812287	4.69806	0.0849336	4.96907	0.0842306	4.78454	0.0846694	4.74831	0.085295	4.46271	0.0852608
		3.84382	0.0928901	31.7347	0.0501079			6.82591	0.0732516	6.5772	0.0769427	6.136	0.0754499	5.80851	0.074544	5.90124	0.0772865	5.78757	0.0752392	5.72206	0.0761817	6.05336	0.0777137	6.03691	0.0787971	5.59009	0.0803112	5.44679	0.0775164	5.36695	0.0773301	5.16077	0.0781808	5.14204	0.0792164	4.9147	0.0814833	4.83054	0.0819553	4.7036	0.0852708	4.98663	0.0849583	4.79398	0.0851037	4.76009	0.0858478	4.46969	0.0856578
		3.71721	0.0941941	35	0.0498883			6.83443	0.0736602	6.58629	0.0778636	6.14091	0.0758432	5.81158	0.0748352	5.90488	0.0778118	5.79037	0.0754933	5.72692	0.0779798	6.06203	0.0782449	6.04684	0.0797306	5.59358	0.0807844	5.45091	0.0778127	5.37023	0.0779686	5.16395	0.0786131	5.14563	0.0798003	4.91773	0.0819113	4.83278	0.082711	4.70547	0.0856214	4.99255	0.0857151	4.79717	0.0855555	4.76406	0.0864226	4.47204	0.0860706
		4.02267	0.0967171	IsoLine	IsoLine			ErrEll	ErrEll	ErrEll	ErrEll	ErrEll	ErrEll	ErrEll	ErrEll	ErrEll	ErrEll	ErrEll	ErrEll	ErrEll	ErrEll	ErrEll	ErrEll	ErrEll	ErrEll	ErrEll	ErrEll	ErrEll	ErrEll	ErrEll	ErrEll	ErrEll	ErrEll	ErrEll	ErrEll	ErrEll	ErrEll	ErrEll	ErrEll	ErrEll	ErrEll	ErrEll	ErrEll	ErrEll	ErrEll	ErrEll	ErrEll	ErrEll	ErrEll
		4.13595	0.0997657
		3.6637	0.101075
		3.70834	0.0996459
		3.76794	0.0999395
		3.62805	0.0978436
		3.67347	0.0984965
		3.90467	0.101603
		3.69555	0.102072
		3.61925	0.100925
		3.51472	0.100724
		3.58189	0.101484
		3.43169	0.100889
		3.46159	0.102205
		3.42868	0.102711
		3.39424	0.102203
		3.65893	0.105067
		3.32515	0.103806
		3.26598	0.105321
		3.26888	0.106775
		3.07546	0.105549
		3.16597	0.110791
		3.15534	0.11371
		3.08907	0.117892
		3.44247	0.142083
		2.5406	0.138241
		1.90282	0.193813
		IsoLine	IsoLine
[truncated: 78 more columns]

[truncated: 8 more sheets: PlotDat12, PlotDat13, PlotDat14, PlotDat15, PlotDat16, PlotDat17, PlotDat18, All U-Pb data]
