# Supplementary material
Source: publisher figshare collection journal article supplement (https://gsapubs.figshare.com/ndownloader/files/23306348)
Supplement: Supplementary file 2 [file 23306348 › 2017392_DR3.xls]

## Sheet: PlotDat1
Source sheet	cleaned (2)	747.595	2.87927
Plot name	Isochron1	653.801	3.12284
Plot Type	14	670.177	5.54521
1st free col	5	668.217	1.81596
Sigma Level	2	702.089	2.56847
Absolute Errs	TRUE	682.357	1.11825
Symbol Type	7	651.609	-0.874498
Inverse Plot	FALSE	683.373	-0.89526
Color Plot	TRUE	669.738	1.9045
3D plot	FALSE	660.289	1.0678
Linear	FALSE	681.004	-0.924369
Data Range	D:D,J:J	685.106	2.41075
Filled Symbols	TRUE	705.086	-0.00390823
ConcAge	FALSE	658.581	-3.08504
ConcSwap	FALSE	699.071	-4.132
1st Symbol-row	1	647.467	1.30366
		676.826	-2.24148
		703.74	-0.918042
		683.29	-2.93373
		698.818	-2.21657
		690.094	0.0550245
		654.343	-2.31962
		672.849	-0.189492
		653.772	-4.72908
		693.758	-3.39282
		691.156	-0.939844
		654.34	-2.34974
		652.61	-2.59787
		663.409	-2.53243
		667.936	-0.950349
		646.894	-4.68216
		680.237	-0.0113514
		709.834	-0.466443
		680.947	-5.56762
		652.753	-4.33928
		654.453	-2.29079
		666.676	-7.14995
		668.547	-2.06221
		670.622	-4.18514
		659.914	-4.54129
		665.267	-4.59754
		646.553	-6.47072
		629.716	-5.60969
		653.734	-6.60602
		672.351	-3.4544
		659.007	-5.60231
		695.507	-1.09125
		673.36	-4.28569
		670.764	-7.21061
		662.979	-4.81582
		677.066	-2.99173
		679.044	-2.60773
		641.239	-2.5051
		651.771	-2.63832
		696.184	-4.3451
		737.648	-4.01121
		664.852	-4.20977
		661.053	-4.15709
		654.989	-2.64271
		669.602	0.288771
		1889.23	-1.10875
		1565.79	9.33798
		1126.13	-0.272138
		1579.74	4.99604
		1171.78	5.19021
		1314.09	9.75936
		2024.39	0.849582
		1494	5.46375
		1576.9	-0.529863
		1313.47	13.3514
		1568.63	3.75301
		1053.09	-1.39492
		1636.1	3.82029
		1099.17	-1.89451
		1564.41	1.17891
		1737.83	2.16479
		1605.45	7.912
		1409.37	7.06658
		1484.88	8.51195
		1135.26	5.2322
		1284.93	-1.18936
		1222.35	0.767796
		1553.18	-2.41006
		1529.95	-1.85573
		1609.43	3.47608
		1566.15	-3.08124
		1256.62	3.36014
		1641.52	-1.72266
		1597.01	7.80329
		1681.21	6.99928
		1583.54	3.24639
		1635.86	1.99874
		1636.75	1.14209
		1116.5	1.3233
		1028.32	4.757
		1599.97	5.84603
		1355.5	6.41293
		1067.6	7.23711
		1626.07	13.4201
		1540.46	-7.54654
		2256.29	1.52341
		1767.58	-5.24547
		1026.77	2.08352
		918.125	7.81484
		1438.1	11.9445
		2723.8	3.88648
		1584.69	3.68149
		1579.99	1.52583
		1203.84	11.5621
		922.183	-0.249536
		1739.22	-3.68843
		1011.54	-0.138036
		820.101	-10.9966
		1522.52	5.30583
		1171.18	7.56754
		977.58	7.31832
		1736.96	-3.44747
		1019.85	8.17732
		1456.43	0.194165
		1046.34	1.92413
		1578.78	1.24058
		851.367	-1.69259
		1591.38	3.9375
		1042.24	5.88487
		1120.38	-4.36274
		1740.06	6.48972
		1092.65	6.13877
		1241.66	0.772699
		2590.29	-10.5465
		1198.85	5.11125
		1138.96	1.81138
		1373.97	3.91311
		1290.26	13.934
		1608.24	1.16268
		1544.65	5.23781
		1123.74	6.27409
		1635.41	-0.166534
		1753.65	7.20322
		1615.73	6.39327
		1764.18	-0.0149519
		1175.21	0.382485
		2457.1	-2.77594
		1665.25	6.05669
		2668.52	3.1356
		1640.63	5.87728
		1276.84	-4.01485
		1615.61	4.01355
		1155.43	9.75288
		1638.21	4.84999
		1159.5	9.73746
		1218.83	2.18782
		1629.88	3.74426
		1130.56	0.582002
		1713.8	2.53389
		1435.84	8.18685
		1578.6	14.0342
		1245.53	8.39052
		1632.52	1.49634
		1423.27	2.29784
		1275	6.43192
		1342.18	0.684304
		1053.56	4.77198
		1443.16	4.30674
		1102.81	4.23883
		1092	-12.0457
		1365.62	0.469306
		1599.03	4.0699
		1518.37	5.64383
		1351.01	7.66079
		1620.78	2.74923
		1161.57	5.87831
		1499.09	4.38244
		1706.16	6.12321
		2019.66	-1.31591
		1376.55	8.28578
		493.568	2.31012
		440.215	5.80574
		1235.47	3.11104
		1646.19	5.79265
		449.282	8.75682
		462.173	4.8883
		1622.41	6.12714
		1645.72	-1.97789
		516.428	-4.4848
		1386.96	3.88785
		1474.67	11.7789
		1436.62	0.706076
		1027.89	5.14632
		467.642	1.26254
		1894.11	3.63721
		1196.16	8.21556
		1145.34	3.27341
		467.492	3.00952
		1602.21	-0.38951
		996.856	2.25058
		1525.39	0.381462
		IsoLine	IsoLine

## Sheet: Hf
Slagstad, T., and Kirkland, C.L., 2017, The use of detrital zircon data in terrane analysis: A nonunique answer to provenance and tectonostratigraphic position in the Scandinavian Caledonides: Lithosphere, https://doi.org/10.1130/L663.1.
GSA Data Repository Item 2017392
Data Repository Supplement DR3: Lu-Hf zircon isotopic data
Sample	spots	Analysis No.	discordance	Age (concordia)	176Hf/177Hf	1 se	176Lu/177Hf	176Yb/177Hf	176Hf/177Hf	epsilon Hf	1 se	T(DM)	T(DM)2	180Hf/177Hf	1 se
85189	84	85189 - 4	-1.77728	1889.23	0.2816	6e-05	0.00139	0.0324	0.28155	-1.10875	2.1	2.33873	2.62597	1.88727	0.000225
85190	138	85190 - 4	3.81051	1565.79	0.28207	0.000105	0.00063	0.01562	0.282051	9.33798	3.675	1.64952	1.70716	1.88658	0.00033
	139	85190 - 5	9.42016	1126.13	0.2821	0.0001	0.0019	0.062	0.28206	-0.272138	3.5	1.66331	1.98155	1.8869	0.000315
	140	85190 - 6	2.02009	1579.74	0.28196	6e-05	0.001335	0.0348	0.28192	4.99604	2.1	1.83441	1.99685	1.88709	0.000245
	141	85190 - 7		1171.78	0.28226	5.5e-05	0.003401	0.09927	0.282185	5.19021	1.925	1.49565	1.66837	1.88702	0.00021
	142	85190 - 8	1.14845	1314.09	0.28225	6e-05	0.0010699	0.04277	0.282223	9.75936	2.1	1.41745	1.48526	1.88712	0.00019
	143	85190 - 9	4.78634	2024.39	0.28155	6e-05	0.000819	0.0219	0.281518	0.849582	2.1	2.37224	2.60556	1.88666	0.000265
	144	85190 - 10	3.2574	1494	0.28204	6e-05	0.001843	0.0491	0.281988	5.46375	2.1	1.74601	1.90053	1.88658	0.00024
	147	85190 - 13	2.60192	1576.9	0.281802	3.85e-05	0.0012	0.0307	0.281766	-0.529863	1.3475	2.04752	2.34751	1.88676	0.000225
	148	85190 - 14	7.85587	1313.47	0.28234	5.5e-05	0.0005998	0.01458	0.282325	13.3514	1.925	1.27554	1.25295	1.88689	0.000225
	149	85190 - 15	7.03855	1568.63	0.281953	4.95e-05	0.00205	0.05391	0.281892	3.75301	1.7325	1.87984	2.06783	1.88704	0.000235
	152	85190 - 18	9.33377	1053.09	0.28208	7.5e-05	0.000295	0.00677	0.282074	-1.39492	2.625	1.62159	1.99618	1.88661	0.000185
	153	85190 - 19	-3.14724	1636.1	0.281892	3.9e-05	0.001324	0.03507	0.281851	3.82029	1.365	1.92883	2.11573	1.88671	0.0002
	157	85190 - 23	3.55393	1099.17	0.28204	5.5e-05	0.000437	0.0118	0.282031	-1.89451	1.925	1.68234	2.06371	1.88657	0.000205
	160	85190 - 26	7.74757	1564.41	0.28192	7.5e-05	0.0033	0.11	0.281822	1.17891	2.625	1.99418	2.22898	1.88749	0.00022
	161	85190 - 27		1737.83	0.28176	6e-05	0.0006278	0.01745	0.281739	2.16479	2.1	2.07447	2.30023	1.88715	0.000285
	163	85190 - 29		1605.45	0.28206	5.5e-05	0.00244	0.0655	0.281986	7.912	1.925	1.74566	1.82958	1.88679	0.000175
	164	85190 - 30	8.51525	1409.37	0.282111	4.45e-05	0.000902	0.0238	0.282087	7.06658	1.5575	1.60444	1.73219	1.88715	0.00019
	166	85190 - 32		1484.88	0.2821	5e-05	0.000725	0.0168	0.28208	8.51195	1.75	1.61221	1.69775	1.88712	0.000235
	167	85190 - 33		1135.26	0.28223	6e-05	0.000974	0.02737	0.282209	5.2322	2.1	1.44177	1.63735	1.88705	0.00024
	168	85190 - 34	7.73444	1284.93	0.28196	6e-05	0.001103	0.0277	0.281933	-1.18936	2.1	1.82319	2.16315	1.88746	0.00027
	170	85190 - 36		1222.35	0.28204	5.5e-05	0.000516	0.01337	0.282028	0.767796	1.925	1.6858	1.99006	1.88667	0.000225
	172	85190 - 38	5.74528	1553.18	0.281767	4.65e-05	0.001316	0.0344	0.281728	-2.41006	1.6275	2.10249	2.44868	1.88682	0.000225
	174	85190 - 40	7.40074	1529.95	0.28179	5.5e-05	0.0010799	0.02701	0.281759	-1.85573	1.925	2.05765	2.39547	1.88681	0.000205
	179	85190 - 45		1609.43	0.28189	7e-05	0.00104	0.0274	0.281858	3.47608	2.45	1.91719	2.11711	1.88686	0.000245
	180	85190 - 46	0.0554475	1566.15	0.28174	6e-05	0.001311	0.0341	0.281701	-3.08124	2.1	2.13973	2.50133	1.88688	0.00018
	184	85190 - 50	7.73235	1256.62	0.2821	6e-05	0.000865	0.0234	0.282079	3.36014	2.1	1.61813	1.85124	1.88698	0.00025
	185	85190 - 51	-0.918933	1641.52	0.28189	6e-05	0.00639	0.241	0.281691	-1.72266	2.1	2.23104	2.47342	1.88714	0.00018
	192	85190 - 58	5.88619	1597.01	0.28207	0.000125	0.002707	0.0716	0.281988	7.80329	4.375	1.74397	1.83005	1.88756	0.00047
	193	85190 - 59	9.01044	1681.21	0.28193	6e-05	0.000574	0.01466	0.281912	6.99928	2.1	1.83923	1.9468	1.88652	0.00024
	194	85190 - 60	6.04201	1583.54	0.28189	0.0001	0.000722	0.01593	0.281868	3.24639	3.5	1.9013	2.11176	1.88665	0.00025
	195	85190 - 61		1635.86	0.28185	5.5e-05	0.00162	0.0412	0.2818	1.99874	1.925	2.00309	2.23196	1.88742	0.000205
	196	85190 - 62		1636.75	0.2818	6e-05	0.000803	0.01981	0.281775	1.14209	2.1	2.02905	2.28731	1.88654	0.000175
	198	85190 - 64	4.4639	1116.5	0.28212	5.5e-05	0.000439	0.01162	0.282111	1.3233	1.925	1.57281	1.8725	1.88682	0.000155
85187	199	85187 - 1	6.23591	1028.32	0.28228	0.000125	0.00086	0.0332	0.282263	4.757	4.375	1.36788	1.58477	1.88643	0.000415
	202	85187 - 4	1.16205	1599.97	0.28196	5.5e-05	0.0009533	0.0247	0.281931	5.84603	1.925	1.81603	1.95801	1.88696	0.00019
	204	85187 - 6	4.66184	1355.5	0.282123	4.7e-05	0.000789	0.0209	0.282103	6.41293	1.645	1.58308	1.73242	1.88649	0.00022
	205	85187 - 7		1067.6	0.28232	6.5e-05	0.0005719	0.01633	0.282308	7.23711	2.275	1.30228	1.45634	1.88658	0.000195
	208	85187 - 10		1626.07	0.28215	0.000135	0.000719	0.0195	0.282128	13.4201	4.725	1.54287	1.49019	1.88653	0.00033
	209	85187 - 11	0.962517	1540.46	0.281618	4.55e-05	0.000903	0.0234	0.281592	-7.54654	1.5925	2.28434	2.764	1.88734	0.00026
	211	85187 - 13	6.47953	2256.29	0.28141	6.5e-05	0.0005119	0.01315	0.281388	1.52341	2.275	2.54272	2.74137	1.88663	0.000275
	212	85187 - 14	6.20747	1767.58	0.281523	4.4e-05	0.0003411	0.00919	0.281512	-5.24547	1.54	2.3795	2.79448	1.88665	0.0002
	214	85187 - 16		1026.77	0.2822	5e-05	0.000574	0.01619	0.282189	2.08352	1.75	1.46812	1.75434	1.88662	0.00021
	215	85187 - 17	8.73866	918.125	0.28243	0.000215	0.000628	0.0161	0.282419	7.81484	7.525	1.15158	1.30321	1.8868	0.0006
	216	85187 - 18	7.08586	1438.1	0.28223	5e-05	0.000876	0.0239	0.282206	11.9445	1.75	1.43805	1.44031	1.88711	0.00019
	220	85187 - 22	1.24214	2723.8	0.28117	5e-05	0.000362	0.0092	0.281151	3.88648	1.75	2.85466	2.9497	1.88677	0.00025
	222	85187 - 24		1584.69	0.28191	6.5e-05	0.001004	0.0243	0.28188	3.68149	2.275	1.8877	2.08483	1.88695	0.00017
	224	85187 - 26	2.33187	1579.99	0.28186	6.5e-05	0.001266	0.033	0.281822	1.52583	2.275	1.97043	2.21891	1.88695	0.00028
	225	85187 - 27	0.724127	1203.84	0.282363	4.65e-05	0.000826	0.02104	0.282344	11.5621	1.6275	1.25107	1.28366	1.88698	0.000245
	230	85187 - 32	4.43044	922.183	0.2822	6.5e-05	0.0006328	0.017078	0.282189	-0.249536	2.275	1.47037	1.82162	1.88651	0.00022
	233	85187 - 35	3.32296	1739.22	0.2816	7.5e-05	0.000802	0.02125	0.281574	-3.68843	2.625	2.30293	2.67386	1.88657	0.000185
	235	85187 - 37		1011.54	0.282147	4.45e-05	0.0005864	0.01594	0.282136	-0.138036	1.5575	1.54167	1.884	1.88675	0.00021
	236	85187 - 38	7.51844	820.101	0.28195	5e-05	5.4e-06	0.000255	0.28195	-10.9966	1.75	1.78543	2.42114	1.88646	0.00022
	237	85187 - 39	4.94456	1522.52	0.28201	3.7e-05	0.001552	0.0388	0.281965	5.30583	1.295	1.77469	1.93272	1.88687	0.000165
	242	85187 - 44	7.20396	1171.18	0.28228	5.5e-05	0.001255	0.0334	0.282252	7.56754	1.925	1.38224	1.51547	1.88707	0.000195
	243	85187 - 45		977.58	0.28239	7.5e-05	0.001215	0.0311	0.282368	7.31832	2.625	1.22596	1.38125	1.88702	0.000345
	245	85187 - 47		1736.96	0.2816	5e-05	0.000553	0.01488	0.281582	-3.44747	1.75	2.2881	2.65682	1.8866	0.000265
	246	85187 - 48	-7.17265	1019.85	0.28238	5e-05	0.0007711	0.02072	0.282365	8.17732	1.75	1.22559	1.35891	1.88676	0.000235
	247	85187 - 49		1456.43	0.28189	6e-05	0.000969	0.02449	0.281863	0.194165	2.1	1.91362	2.2081	1.88689	0.000175
	248	85187 - 50		1046.34	0.28219	7.5e-05	0.000911	0.02615	0.282172	1.92413	2.625	1.49505	1.7797	1.8868	0.000275
	249	85187 - 51	9.6425	1578.78	0.281834	4.85e-05	0.00064	0.01634	0.281815	1.24058	1.6975	1.97394	2.23617	1.8867	0.000195
	253	85187 - 55	4.82402	851.367	0.2822	6e-05	0.0004454	0.01149	0.282193	-1.69259	2.1	1.46321	1.85821	1.88657	0.000245
	254	85187 - 56	1.15771	1591.38	0.2819	7e-05	0.00057	0.01498	0.281883	3.9375	2.45	1.88011	2.07363	1.88665	0.000215
	255	85187 - 57	3.79866	1042.24	0.2823	5.5e-05	0.000694	0.01855	0.282286	5.88487	1.925	1.3342	1.52336	1.88715	0.000145
	257	85187 - 59		1120.38	0.28196	8e-05	0.000572	0.01483	0.281948	-4.36274	2.8	1.79802	2.23666	1.88695	0.000185
85185	258	85185 - 1		1740.06	0.281882	4.25e-05	0.0006756	0.021061	0.28186	6.48972	1.4875	1.90997	2.025	1.88712	0.0002
	260	85185 - 3		1092.65	0.28228	6e-05	0.00089	0.0291	0.282262	6.13877	2.1	1.36896	1.54622	1.88691	0.000175
	262	85185 - 5	1.53433	1241.66	0.282031	4.5e-05	0.00064	0.02088	0.282016	0.772699	1.575	1.70363	2.00472	1.8866	0.00019
	263	85185 - 6	0.318847	2590.29	0.28084	6.5e-05	0.0001559	0.00451	0.280832	-10.5465	2.275	3.2767	3.76456	1.88732	0.00018
	265	85185 - 8		1198.85	0.28218	5e-05	0.000642	0.02052	0.282165	5.11125	1.75	1.49835	1.69443	1.88665	0.000245
	266	85185 - 9		1138.96	0.282123	4.25e-05	0.0005904	0.01859	0.28211	1.81138	1.4875	1.57489	1.85882	1.8871	0.000215
	267	85185 - 10		1373.97	0.282042	4.2e-05	0.000825	0.0258	0.282021	3.91311	1.47	1.69668	1.90685	1.88663	0.000175
	268	85185 - 11		1290.26	0.282377	4.15e-05	0.00085	0.0268	0.282356	13.934	1.4525	1.23232	1.19729	1.88669	0.000185
	270	85185 - 13		1608.24	0.281837	3.7e-05	0.001416	0.0421	0.281794	1.16268	1.295	2.0104	2.26394	1.88691	0.000145
	271	85185 - 14		1544.65	0.281979	4.25e-05	0.001017	0.0323	0.281949	5.23781	1.4875	1.79272	1.95421	1.88669	0.00016
	273	85185 - 16		1123.74	0.28226	4.35e-05	0.000669	0.0215	0.282246	6.27409	1.5225	1.38874	1.56167	1.88714	0.000175
	274	85185 - 17		1635.41	0.28177	5.5e-05	0.000998	0.0292	0.281739	-0.166534	1.925	2.08082	2.36968	1.88668	0.000165
	275	85185 - 18		1753.65	0.28189	5e-05	0.000568	0.01757	0.281871	7.20322	1.75	1.89369	1.98967	1.88679	0.000225
	276	85185 - 19	1.44684	1615.73	0.28196	5e-05	0.0007687	0.02333	0.281936	6.39327	1.75	1.80727	1.93509	1.88672	0.00016
	277	85185 - 20	0.591985	1764.18	0.28171	0.00014	0.001463	0.04355	0.281661	-0.0149519	4.9	2.19018	2.45965	1.88701	0.000425
	278	85185 - 21		1175.21	0.28207	7.5e-05	0.001034	0.0326	0.282047	0.382485	2.625	1.66708	1.978	1.88663	0.000205
	279	85185 - 22	4.60438	2457.1	0.281159	4.75e-05	0.000466	0.0147	0.281137	-2.77594	1.6625	2.87702	3.17008	1.88695	0.00015
	280	85185 - 23		1665.25	0.281937	4.35e-05	0.00132	0.0423	0.281895	6.05669	1.5225	1.86581	1.99498	1.88651	0.00021
	281	85185 - 24	2.33401	2668.52	0.281219	4.65e-05	0.001038	0.03134	0.281166	3.1356	1.6275	2.83828	2.95538	1.88689	0.000175
	282	85185 - 25		1640.63	0.28194	6e-05	0.001093	0.02872	0.281906	5.87728	2.1	1.85049	1.98745	1.88654	0.0002
	283	85185 - 26	2.6217	1276.84	0.281867	4.85e-05	0.000344	0.0075	0.281859	-4.01485	1.6975	1.91402	2.33616	1.88656	0.00015
	284	85185 - 27		1615.61	0.281893	4.85e-05	0.000768	0.02407	0.28187	4.01355	1.6975	1.89945	2.08751	1.88686	0.000185
	285	85185 - 28		1155.43	0.28233	5e-05	0.0002802	0.00737	0.282324	9.75288	1.75	1.2787	1.36275	1.88654	0.00017
	286	85185 - 29	1.66803	1638.21	0.281924	3.9e-05	0.001462	0.0424	0.281879	4.84999	1.365	1.89108	2.05143	1.88689	0.000185
	287	85185 - 30		1159.5	0.282334	2.95e-05	0.0006	0.017	0.282321	9.73746	1.0325	1.28385	1.3669	1.88682	0.000155
	288	85185 - 31		1218.83	0.282077	4.95e-05	0.0002878	0.008766	0.28207	2.18782	1.7325	1.62538	1.89678	1.88694	0.00014
	290	85185 - 33		1629.88	0.28187	5e-05	0.000557	0.0178	0.281853	3.74426	1.75	1.9205	2.11578	1.88638	0.00021
	291	85185 - 34		1130.56	0.2821	4.1e-05	0.0008934	0.02816	0.282081	0.582002	1.435	1.61934	1.93064	1.88627	0.00017
	292	85185 - 35		1713.8	0.28179	6.5e-05	0.000767	0.02477	0.281765	2.53389	2.275	2.04086	2.25806	1.88696	0.000205
	293	85185 - 36		1435.84	0.28212	5e-05	0.000674	0.02118	0.282102	8.18685	1.75	1.58247	1.68071	1.8862	0.00012
	294	85185 - 37		1578.6	0.28221	0.000195	0.001155	0.03438	0.282175	14.0342	6.825	1.4767	1.41376	1.8886	0.0015
	295	85185 - 38	0.565724	1245.53	0.282251	4.7e-05	0.000963	0.0262	0.282228	8.39052	1.645	1.41206	1.52023	1.88666	0.00016
	296	85185 - 39		1632.52	0.281803	4.2e-05	0.000492	0.0158	0.281788	1.49634	1.47	2.00863	2.26144	1.8867	0.000175
	297	85185 - 40	2.63432	1423.27	0.28198	6e-05	0.001349	0.0407	0.281944	2.29784	2.1	1.80712	2.04827	1.88702	0.00024
	298	85185 - 41	1.52837	1275	0.282184	4e-05	0.001228	0.0381	0.282154	6.43192	1.4	1.51603	1.66883	1.88683	0.00021
	299	85185 - 42		1342.18	0.281986	3.7e-05	0.00143	0.0469	0.28195	0.684304	1.295	1.8026	2.08832	1.88676	0.0002
	300	85185 - 43		1053.56	0.28226	6.5e-05	0.0006132	0.01931	0.282248	4.77198	2.275	1.38672	1.6034	1.88675	0.00017
	301	85185 - 44		1443.16	0.28201	6e-05	0.000818	0.02428	0.281988	4.30674	2.1	1.74058	1.93527	1.88673	0.00017
	302	85185 - 45	2.30946	1102.81	0.282215	4.6e-05	0.000642	0.0199	0.282202	4.23883	1.61	1.45	1.67574	1.88678	0.00023
	303	85185 - 46	3.40246	1092	0.281758	4.3e-05	0.0004313	0.01337	0.281749	-12.0457	1.505	2.06665	2.69874	1.88715	0.0002
	304	85185 - 47		1365.62	0.28194	6e-05	0.000434	0.012	0.281929	0.469306	2.1	1.81891	2.12019	1.88705	0.00017
	305	85185 - 48		1599.03	0.28198	5.5e-05	0.003248	0.1076	0.281882	4.0699	1.925	1.90303	2.07107	1.88635	0.00021
	306	85185 - 49	-0.860267	1518.37	0.281997	3.55e-05	0.00068	0.02053	0.281977	5.64383	1.2425	1.75221	1.90785	1.88669	0.00017
	307	85185 - 50		1351.01	0.282156	3.5e-05	0.0005946	0.0187	0.282141	7.66079	1.225	1.52959	1.64884	1.88669	0.00015
	308	85185 - 51		1620.78	0.281861	3.45e-05	0.000991	0.02863	0.281831	2.74923	1.2075	1.95482	2.17235	1.88677	0.000205
85186	311	85186 - 1		1161.57	0.28223	5.5e-05	0.00088	0.0283	0.282211	5.87831	1.925	1.43821	1.61638	1.88677	0.000195
	312	85186 - 2		1499.09	0.28197	5.5e-05	0.0005571	0.01668	0.281954	4.38244	1.925	1.78362	1.97373	1.88685	0.000195
	313	85186 - 3		1706.16	0.281905	4.55e-05	0.001049	0.03315	0.281871	6.12321	1.5925	1.89687	2.02232	1.88699	0.00016
	314	85186 - 4		2019.66	0.281481	4.7e-05	0.0005322	0.01607	0.281461	-1.31591	1.645	2.44809	2.7399	1.88692	0.000245
	315	85186 - 5		1376.55	0.28216	6e-05	0.0006839	0.02028	0.282142	8.28578	2.1	1.52763	1.62845	1.88662	0.00017
	316	85186 - 6		493.568	0.28254	5.5e-05	0.001056	0.0324	0.28253	2.31012	1.925	1.00986	1.32497	1.88695	0.00019
	317	85186 - 7		440.215	0.28267	5.5e-05	0.000932	0.0251	0.282662	5.80574	1.925	0.823661	1.06016	1.88697	0.000245
	318	85186 - 8		1235.47	0.282121	4.75e-05	0.001507	0.0471	0.282086	3.11104	1.6625	1.61625	1.85075	1.88681	0.000195
	321	85186 - 11		1646.19	0.281917	4.4e-05	0.000542	0.0158	0.2819	5.79265	1.54	1.85549	1.99718	1.88687	0.000215
	322	85186 - 12		449.282	0.282745	4.95e-05	0.000592	0.01692	0.28274	8.75682	1.7325	0.71145	0.878057	1.88635	0.000175
	323	85186 - 13		462.173	0.282625	4.5e-05	0.0002678	0.00811	0.282623	4.8883	1.575	0.871715	1.13595	1.88687	0.000175
	324	85186 - 14		1622.41	0.28197	7e-05	0.001474	0.0474	0.281925	6.12714	2.45	1.82717	1.95733	1.88685	0.000195
	325	85186 - 15		1645.72	0.28171	5.5e-05	0.000915	0.02697	0.281681	-1.97789	1.925	2.1588	2.49288	1.88683	0.0002
	326	85186 - 16		516.428	0.282336	4.1e-05	0.0012379	0.03812	0.282324	-4.4848	1.435	1.30281	1.7741	1.88695	0.00016
	328	85186 - 18		1386.96	0.28204	6e-05	0.001083	0.0338	0.282012	3.88785	2.1	1.71101	1.91853	1.88645	0.000235
	329	85186 - 19	-5.39612	1474.67	0.282228	3.2e-05	0.001785	0.0417	0.282178	11.7789	1.12	1.47612	1.47929	1.88688	0.000185
	330	85186 - 20	5.55878	1436.62	0.28193	5e-05	0.00146	0.0455	0.28189	0.706076	1.75	1.88257	2.16014	1.88717	0.00018
	331	85186 - 21		1027.89	0.282288	4.25e-05	0.0006921	0.02264	0.282275	5.14632	1.4875	1.35077	1.55952	1.88683	0.000155
	332	85186 - 22		467.642	0.282524	4.05e-05	0.000817	0.02025	0.282517	1.26254	1.4175	1.0259	1.37148	1.88709	0.000145
	333	85186 - 23		1894.11	0.28172	5.5e-05	0.0010941	0.03228	0.281681	3.63721	1.925	2.15515	2.32684	1.88645	0.00018
	334	85186 - 24		1196.16	0.282274	4.4e-05	0.000854	0.0268	0.282255	8.21556	1.54	1.37601	1.49321	1.88662	0.00017
	335	85186 - 25		1145.34	0.28218	0.000125	0.001504	0.0435	0.282148	3.27341	4.375	1.53286	1.77045	1.88762	0.000405
	336	85186 - 26	-7.23832	467.492	0.2826	6.5e-05	0.00385	0.1188	0.282566	3.00952	2.275	0.999385	1.26005	1.88672	0.000195
	338	85186 - 28		1602.21	0.28182	6e-05	0.002176	0.0675	0.281754	-0.38951	2.1	2.076	2.35818	1.8868	0.000255
	340	85186 - 30		996.856	0.282225	4.75e-05	0.0006665	0.02102	0.282212	2.25058	1.6625	1.43709	1.72044	1.88663	0.000185
	341	85186 - 31		1525.39	0.281861	3.9e-05	0.001258	0.0368	0.281825	0.381462	1.365	1.96862	2.24959	1.88651	0.000165
